# Supplementary material for: Structure-Based Molecular Networking for the Discovery of Anti-HBV Compounds from Saussurea lappa (Decne.) C.B Clarke
Source: MDPI journal article supplement (doi:10.3390/molecules27062023), 2022-03-21
Supplement: s1 [file s1]

## SUPPLEMENTARY MATERIAL

### Structure-Based Molecular Networking for the Discovery of Anti-HBV compounds from *Saussurea lappa* *Saussurea lappa* (Decne.) C.B Clarke

Tao Wu,<sup>1,2</sup> Xin-Jian Yan,<sup>1,2</sup> Tian-Rong Yang,<sup>1,2</sup> Yun-fen Wang,<sup>1</sup> Jing-Yi He,<sup>1</sup> Yang  
Feng,<sup>1</sup> Hao Chen,<sup>1, \*</sup> and Min Xu<sup>1, \*</sup>

<sup>1</sup> Center for Pharmaceutical Sciences, Faculty of Life Science and Technology,  
Kunming University of Science and Technology, Chenggong Campus, Kunming  
650500, P. R. China

<sup>2</sup> These authors contributed equally to this work

\* Correspondence: [chenhao@kust.edu.cn](mailto:chenhao@kust.edu.cn) (H.C.), [xumin@kust.edu.cn](mailto:xumin@kust.edu.cn) (M.X.);

Tel: +86 871 65920253

## Supplementary material

| Content                                                                                              | Page  |
|------------------------------------------------------------------------------------------------------|-------|
| Table S1. The top ten square nodes.                                                                  | 4     |
| Table S2. Classification of medicinal plants.                                                        | 5     |
| Table S3. Classification of Saussurea DC                                                             | 6     |
| Figure S1. <sup>1</sup> H NMR spectrum of compound 1 (CD <sub>3</sub> OD, 600 MHz)                   | 7     |
| Figure S2. <sup>13</sup> C NMR spectrum of compound 1 (CD <sub>3</sub> OD, 150 MHz)                  | 8     |
| Figure S3. ROESY spectrum of compound 1 (CD <sub>3</sub> OD, 600 MHz)                                | 9     |
| Figure S4. <sup>1</sup> H- <sup>1</sup> H COSY spectrum of compound 1 (CD <sub>3</sub> OD, 600 MHz)  | 10    |
| Figure S5. HSQC spectrum of compound 1 (CD <sub>3</sub> OD, 600 MHz)                                 | 11    |
| Figure S6. HMBC spectrum of compound 1 (CD <sub>3</sub> OD, 600 MHz)                                 | 12    |
| Figure S7. HRESI spectrum of compound 1                                                              | 13    |
| Figure S8. CD and UV spectrum of compound 1                                                          | 14    |
| Figure S9. IR spectrum of compound 1                                                                 | 15    |
| Figure S10. $[\alpha]$ 25D of compound 1                                                             | 16    |
| Figure S11. <sup>1</sup> H NMR spectrum of compound 2 (CD <sub>3</sub> OD, 600 MHz)                  | 17    |
| Figure S12. <sup>13</sup> C NMR spectrum of compound 2 (CD <sub>3</sub> OD, 150 MHz)                 | 18    |
| Figure S13. ROESY spectrum of compound 2 (CD <sub>3</sub> OD, 600 MHz)                               | 19    |
| Figure S14. <sup>1</sup> H- <sup>1</sup> H COSY spectrum of compound 2 (CD <sub>3</sub> OD, 600 MHz) | 20    |
| Figure S15. HSQC spectrum of compound 2 (CD <sub>3</sub> OD, 600 MHz)                                | 21    |
| Figure S16. HMBC spectrum of compound 2 (CD <sub>3</sub> OD, 600 MHz)                                | 22    |
| Figure S17. HRESI spectrum of compound 2                                                             | 23    |
| Figure S18. CD and UV spectrum of compound 2                                                         | 24    |
| Figure S19. IR spectrum of compound 2                                                                | 25    |
| Figure S20. $[\alpha]$ 25D of compound 2                                                             | 26    |
| Figure S21. X-ray crystallographic analysis for compound 2                                           | 27-29 |
| Figure S22. <sup>1</sup> H NMR spectrum of compound 3 (CD <sub>3</sub> OD, 600 MHz)                  | 30    |
| Figure S23. <sup>13</sup> C NMR spectrum of compound 3 (CD <sub>3</sub> OD, 150 MHz)                 | 31    |
| Figure S24. ROESY spectrum of compound 3 (CD <sub>3</sub> OD, 600 MHz)                               | 32    |
| Figure S25. <sup>1</sup> H- <sup>1</sup> H COSY spectrum of compound 3 (CD <sub>3</sub> OD, 600 MHz) | 33    |
| Figure S26. HSQC spectrum of compound 3 (CD <sub>3</sub> OD, 600 MHz)                                | 34    |
| Figure S27. HMBC spectrum of compound 3 (CD <sub>3</sub> OD, 600 MHz)                                | 35    |
| Figure S28. HRESI spectrum of compound 3                                                             | 36    |
| Figure S29. CD and UV spectrum of compound 3                                                         | 37    |
| Figure S30. IR spectrum of compound 3                                                                | 38    |
| Figure S31. $[\alpha]$ 25D of compound 3                                                             | 39    |
| Figure S32. <sup>1</sup> H NMR spectrum of compound 4 (CD <sub>3</sub> OD, 600 MHz)                  | 40    |
| Figure S33. <sup>13</sup> C NMR spectrum of compound 4 (CD <sub>3</sub> OD, 150 MHz)                 | 41    |
| Figure S34. ROESY spectrum of compound 4 (CD <sub>3</sub> OD, 600 MHz)                               | 42    |
| Figure S35. <sup>1</sup> H- <sup>1</sup> H COSY spectrum of compound 4 (CD <sub>3</sub> OD, 600 MHz) | 43    |
| Figure S36. HSQC spectrum of compound 4 (CD <sub>3</sub> OD, 600 MHz)                                | 44    |
| Figure S37. HMBC spectrum of compound 4 (CD <sub>3</sub> OD, 600 MHz)                                | 45    |

|                                                                                                   |       |
|---------------------------------------------------------------------------------------------------|-------|
| Figure S38. HRESI spectrum of compound 4                                                          | 46    |
| Figure S39. CD and UV spectrum of compound 4                                                      | 47    |
| Figure S40. IR spectrum of compound 4                                                             | 48    |
| Figure S41. $[\alpha]$ 25D of compound 4                                                          | 49    |
| Figure S42. $^1\text{H}$ NMR spectrum of compound 5 (CD <sub>3</sub> OD, 600 MHz)                 | 50    |
| Figure S43. $^{13}\text{C}$ NMR spectrum of compound 5 (CD <sub>3</sub> OD, 150 MHz)              | 51    |
| Figure S44. ROESY spectrum of compound 5 (CD <sub>3</sub> OD, 600 MHz)                            | 52    |
| Figure S45. $^1\text{H}$ - $^1\text{H}$ COSY spectrum of compound 5 (CD <sub>3</sub> OD, 600 MHz) | 53    |
| Figure S46. HSQC spectrum of compound 5 (CD <sub>3</sub> OD, 600 MHz)                             | 54    |
| Figure S47. HMBC spectrum of compound 5 (CD <sub>3</sub> OD, 600 MHz)                             | 55    |
| Figure S48. HRESI spectrum of compound 5                                                          | 56    |
| Figure S49. CD and UV spectrum of compound 5                                                      | 57    |
| Figure S50. IR spectrum of compound 5                                                             | 58    |
| Figure S51. $[\alpha]$ 25D of compound 5                                                          | 59    |
| Figure S52. $^1\text{H}$ NMR spectrum of compound 6 (CD <sub>3</sub> OD, 600 MHz)                 | 60    |
| Figure S53. $^{13}\text{C}$ NMR spectrum of compound 6 (CD <sub>3</sub> OD, 150 MHz)              | 61    |
| Figure S54. ROESY spectrum of compound 6 (CD <sub>3</sub> OD, 600 MHz)                            | 62    |
| Figure S55. $^1\text{H}$ - $^1\text{H}$ COSY spectrum of compound 6 (CD <sub>3</sub> OD, 600 MHz) | 63    |
| Figure S56. HSQC spectrum of compound 6 (CD <sub>3</sub> OD, 600 MHz)                             | 64    |
| Figure S57. HMBC spectrum of compound 6 (CD <sub>3</sub> OD, 600 MHz)                             | 65    |
| Figure S58. HRESI spectrum of compound 6                                                          | 66    |
| Figure S59. CD and UV spectrum of compound 6                                                      | 67    |
| Figure S60. IR spectrum of compound 6                                                             | 68    |
| Figure S61. $[\alpha]$ 25D of compound 6                                                          | 69    |
| Figure S62. $^1\text{H}$ NMR spectrum of compound 7 (CD <sub>3</sub> OD, 600 MHz)                 | 70    |
| Figure S63. $^{13}\text{C}$ NMR spectrum of compound 7 (CD <sub>3</sub> OD, 150 MHz)              | 71    |
| Figure S64. ROESY spectrum of compound 7 (CD <sub>3</sub> OD, 600 MHz)                            | 72    |
| Figure S65. $^1\text{H}$ - $^1\text{H}$ COSY spectrum of compound 7 (CD <sub>3</sub> OD, 600 MHz) | 73    |
| Figure S66. HSQC spectrum of compound 7 (CD <sub>3</sub> OD, 600 MHz)                             | 74    |
| Figure S67. HMBC spectrum of compound 7 (CD <sub>3</sub> OD, 600 MHz)                             | 75    |
| Figure S68. HRESI spectrum of compound 7                                                          | 76    |
| Figure S69. CD and UV spectrum of compound 7                                                      | 77    |
| Figure S70. IR spectrum of compound 7                                                             | 78    |
| Figure S71. $[\alpha]$ 25D of compound 7                                                          | 79    |
| Figure S72. $^1\text{H}$ NMR spectrum of compound 10 (CD <sub>3</sub> OD, 600 MHz)                | 80    |
| Figure S73. $^{13}\text{C}$ NMR and DEPT spectrum of compound 6 (CD <sub>3</sub> OD, 150 MHz)     | 81    |
| Figure S74. ESI <sup>+</sup> spectrum of compound 10                                              | 82    |
| Figure S75. X-ray crystallographic analysis for compound 10                                       | 83-85 |

**Table S1.** The top ten square nodes.

| Number | Degree | Smiles                                     | Skeleton _types |
|--------|--------|--------------------------------------------|-----------------|
| 45     | 27     | <chem>C(C)(C)C1CC2C(C)(CC1)CCCC2C</chem>   | Eudesmane       |
| 21     | 21     | <chem>C(C)(C)C1CC2C(C)CCC2C(C)CC1</chem>   | Guaiane         |
| 26     | 20     | <chem>C(C)(C)C1C2C(C(C)CC1)CCC(C)C2</chem> | Cadinane        |
| 54     | 18     | <chem>CC1CCCC(C)CCC(C(C)C)CC1</chem>       | Germacane       |
| 40     | 16     | <chem>C(CCCC(C)C1CCC(C)CC1)(C)C</chem>     | Bisabolane      |
| 9      | 16     | <chem>C(C)(C)C1CCC(CCCC)C(C)CC1</chem>     | secoguaiane     |
| 27     | 15     | <chem>C(C)(C)C1C2C(C(C)CC1)CC(C)CC2</chem> | Lasserane       |
| 17     | 15     | <chem>C(C)(C)C1CC2C(C)(CCC2CC)CC1</chem>   | Iphionane       |
| 87     | 14     | <chem>CC(CC1)CC21CC(C(C)C)CCC2C</chem>     | Spiroaxane      |
| 73     | 13     | <chem>CC1C(C)CCC(C)C2C(C(C)CC2)C1</chem>   | Dumortane       |

**Table S2.** Classification of medicinal plants.

| No  | Skeleton      | Skeleton_SMILES                              | Sources_A                       | Sources_B                         | Sources_C                    | Sources_D                      | Sources_E                         |
|-----|---------------|----------------------------------------------|---------------------------------|-----------------------------------|------------------------------|--------------------------------|-----------------------------------|
| 21  | Guaiane       | <chem>C(C)(C)C1CC2C(C)CC2C(C)CC1</chem>      | <i>Saussurea</i> DC             | <i>Artemisia</i> L.               | <i>Mikania</i> Willd         | <i>Glebionis</i> Cass.         | <i>Anthemis</i> L.                |
| 54  | Germacane     | <chem>CC1CCCC(C)CCC(C(C)C)CC1</chem>         | <i>Saussurea</i> DC             | <i>Inula</i> L.                   | <i>Carpesium</i> L.          | <i>Pseudelephantopus</i> Rohr. | <i>Helianthus</i> .               |
| 45  | Eudesmane     | <chem>C(C)(C)C1CC2C(C)(C1)CCCC2C</chem>      | <i>Saussurea</i> DC             | <i>Tugarinovia</i> Iljin          | <i>Inula</i> L.              | <i>Atractylodes</i>            | <i>Tanacetum</i> L.               |
| 40  | Bisabolane    | <chem>C(CCCC(C)C1CCC(C)CC1)(C)C</chem>       | <i>Ligusticum</i> L.            | <i>Eupatorium</i> L.              | <i>Cremanthodium</i> Benth   | <i>Artemisia</i> L.            | <i>Matricaria</i>                 |
| 26  | Cadinane      | <chem>C(C)(C)C1C2C(C(C)C1)CCC(C)C2</chem>    | <i>Pteridium</i>                | <i>Pulicaria</i> Gaertn.          | <i>Eupatorium</i> L.         | <i>Artemisia</i> L.            | <i>Cyperus</i> L.                 |
| 22  | Carotane      | <chem>CC1(CCC2C(C)C)C2C(C)CC1</chem>         | <i>Inula</i> L.                 | <i>Ageratum</i> L.                | <i>Ferula</i> L.             | <i>Sium</i> L.                 | <i>Daucus</i> L.                  |
| 63  | Caryophyllane | <chem>CC1(C)C2C(C(C)CCC(C)CC2)C1</chem>      | <i>Dacrydium pierrei</i> Hickel | <i>Juniperus formosana</i> Hayata | <i>Sindora</i> Miq.          | <i>Gossypium</i> L.            | <i>Pulicaria</i> Gaertn.          |
| 44  | Prezizaane    | <chem>CC(CC1)C2(CC3)C1C(C)(C)C(C)C3C2</chem> | <i>Juniperus</i> L.             | <i>Neocallitropsis</i>            | <i>Vetiveria</i>             | <i>Illicium</i> L.             | <i>Streptomyces</i>               |
| 119 | Patchoulane   | <chem>CC1CCC(C2(C)C)C3(C)C1CC2CC3</chem>     | <i>Pogostemon helferi</i>       | <i>Cyperus</i> L.                 | <i>Croton crassifolius</i> . | <i>Daphne</i> L.               | <i>Agastache</i> Clayt. in Gronov |
| 50  | Eremophila ne | <chem>C(C)(C)C1CC2(C)C(C)CCCC2CC1</chem>     | <i>Senecio</i> L.               | <i>Solidago</i> L. .              | <i>Ligularia</i> Cass.       | <i>Litsea</i>                  | <i>Pedicularis</i> L.             |

**Table S3.** Classification of *Saussurea* DC

| NAME                          | Number of documents | Skeleton_number | Skeleton_types               |
|-------------------------------|---------------------|-----------------|------------------------------|
| <i>Saussurea cauloptera</i>   | 1                   | 2               | Eudesmane、Serpentine         |
| <i>Saussurea deltoidei</i>    | 1                   | 2               | Guaiane、elemane              |
| <i>Saussurea laniceps</i>     | 2                   | 2               | Guaiane、Germacrane           |
| <i>Saussurea lappa</i>        | 4                   | 3               | Eudesmane、Guaiane、Germacrane |
| <i>Saussurea macrota</i>      | 1                   | 2               | Guaiane、Germacrane           |
| <i>Saussurea medusa</i>       | 2                   | 2               | Eudesmane、Cadinene)          |
| <i>Saussurea medusa Maxim</i> | 1                   | 2               | Eudesmane、Amyrane            |
| <i>Saussurea pulchella</i>    | 1                   | 2               | Guaiane、Germacrane           |
| <i>Saussureae Radix</i>       | 1                   | 2               | Eudesmane、Guaian             |

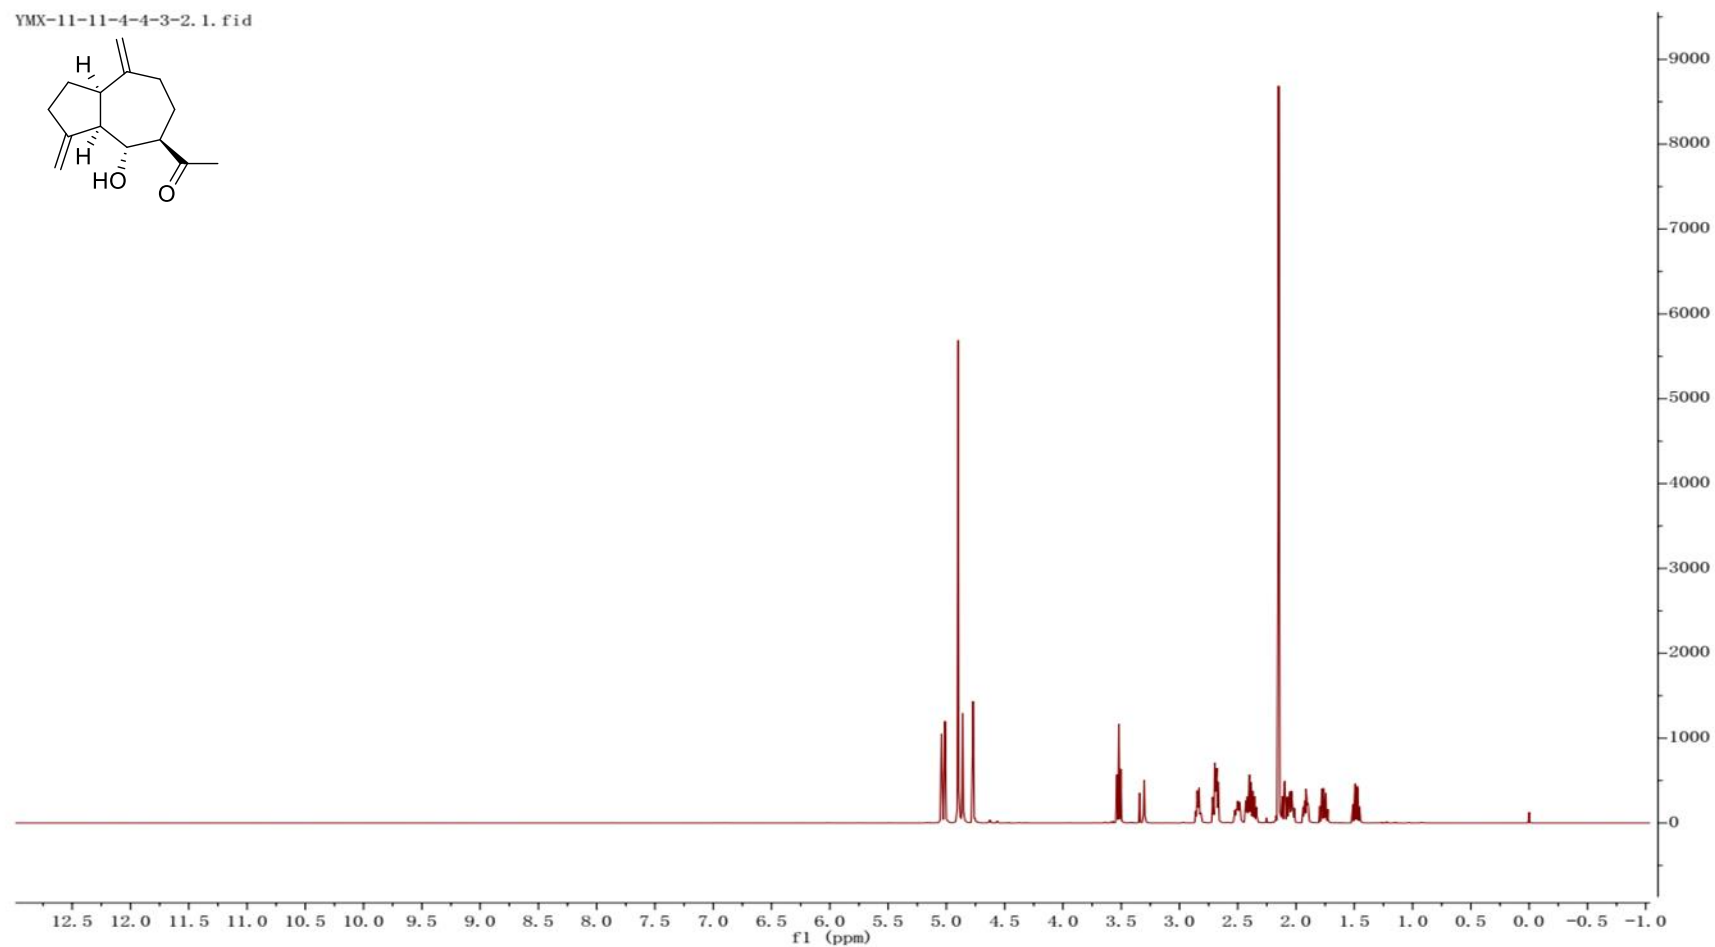

**Figure S1.**  $^1\text{H}$  NMR spectrum of compound **1** ( $\text{CD}_3\text{OD}$ , 600 MHz)

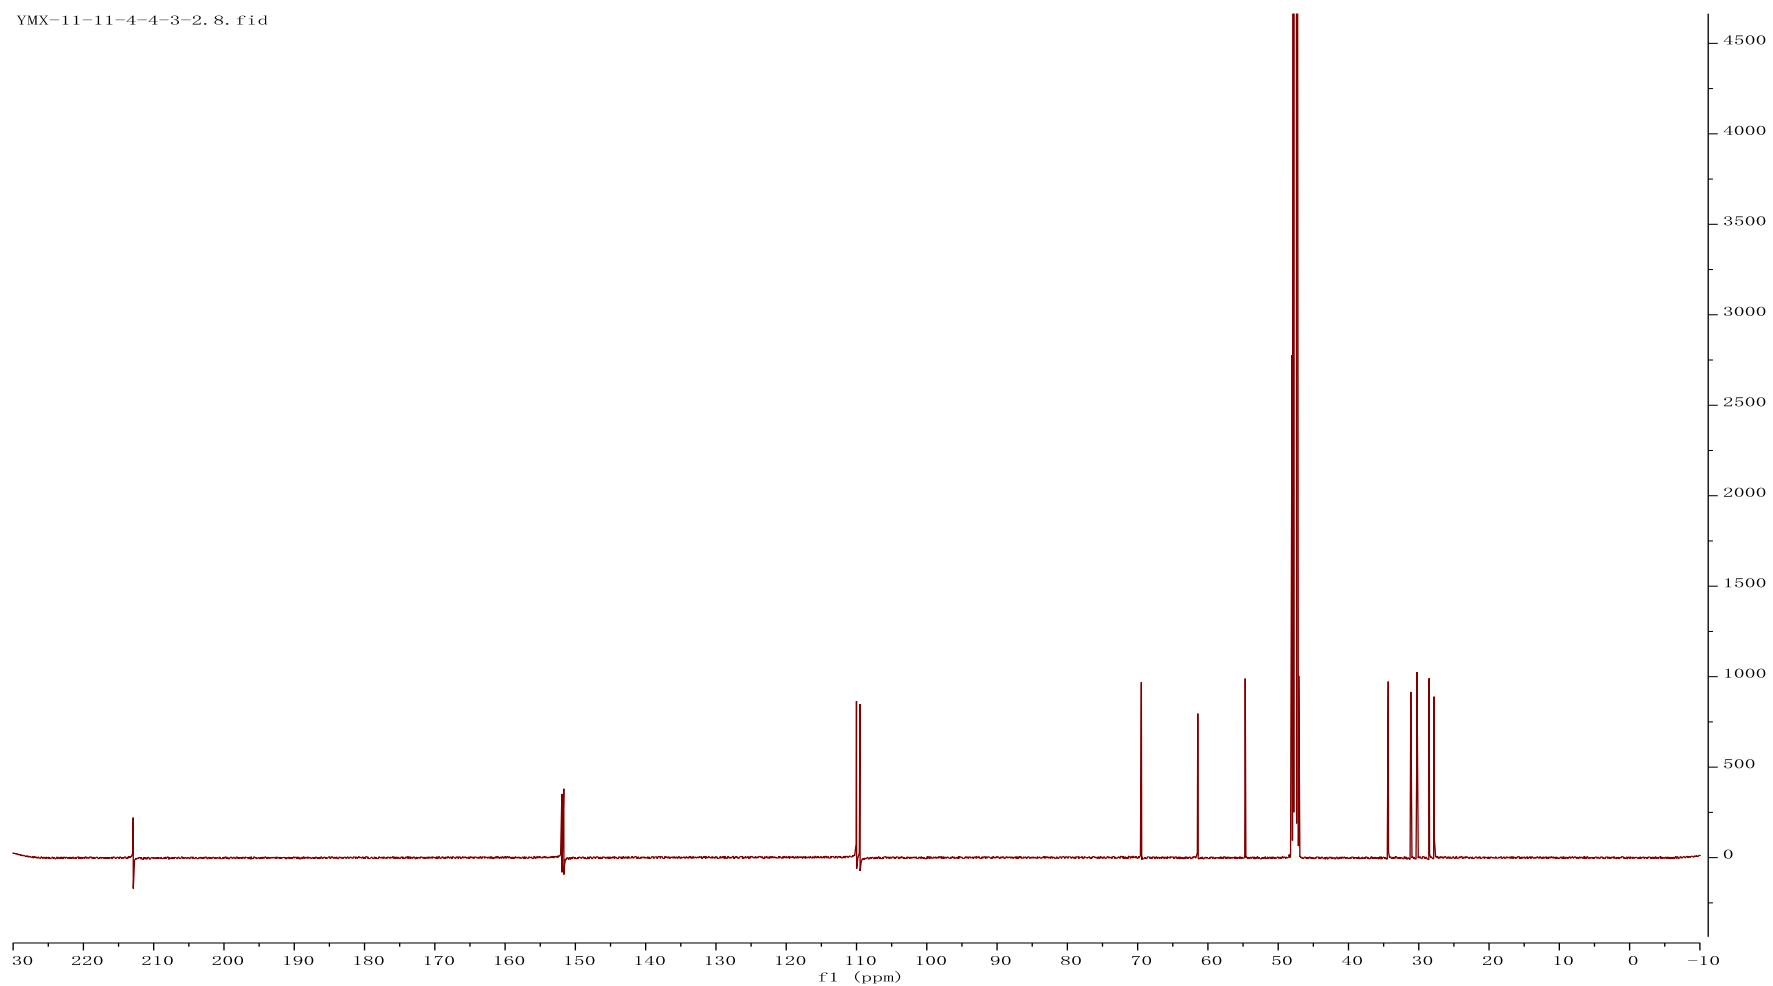

**Figure S2.**  $^{13}\text{C}$  NMR spectrum of compound **1** ( $\text{CD}_3\text{OD}$ , 150 MHz)

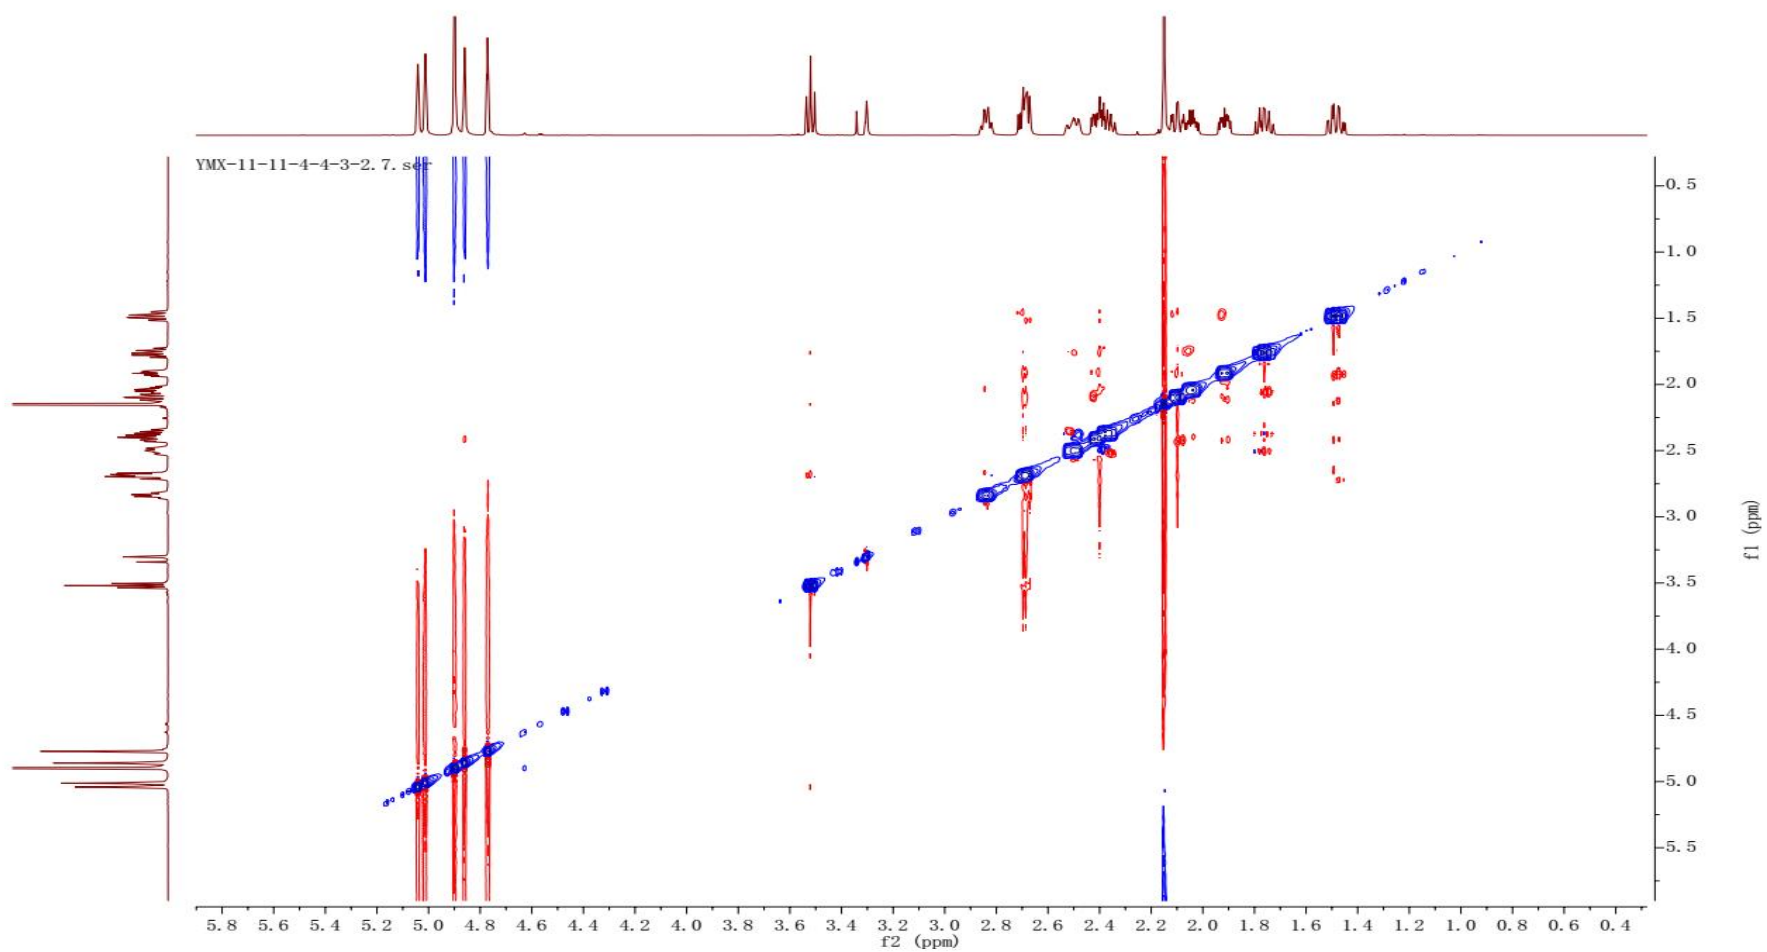

**Figure S3.** ROESY spectrum of compound **1** (CD<sub>3</sub>OD, 600 MHz)

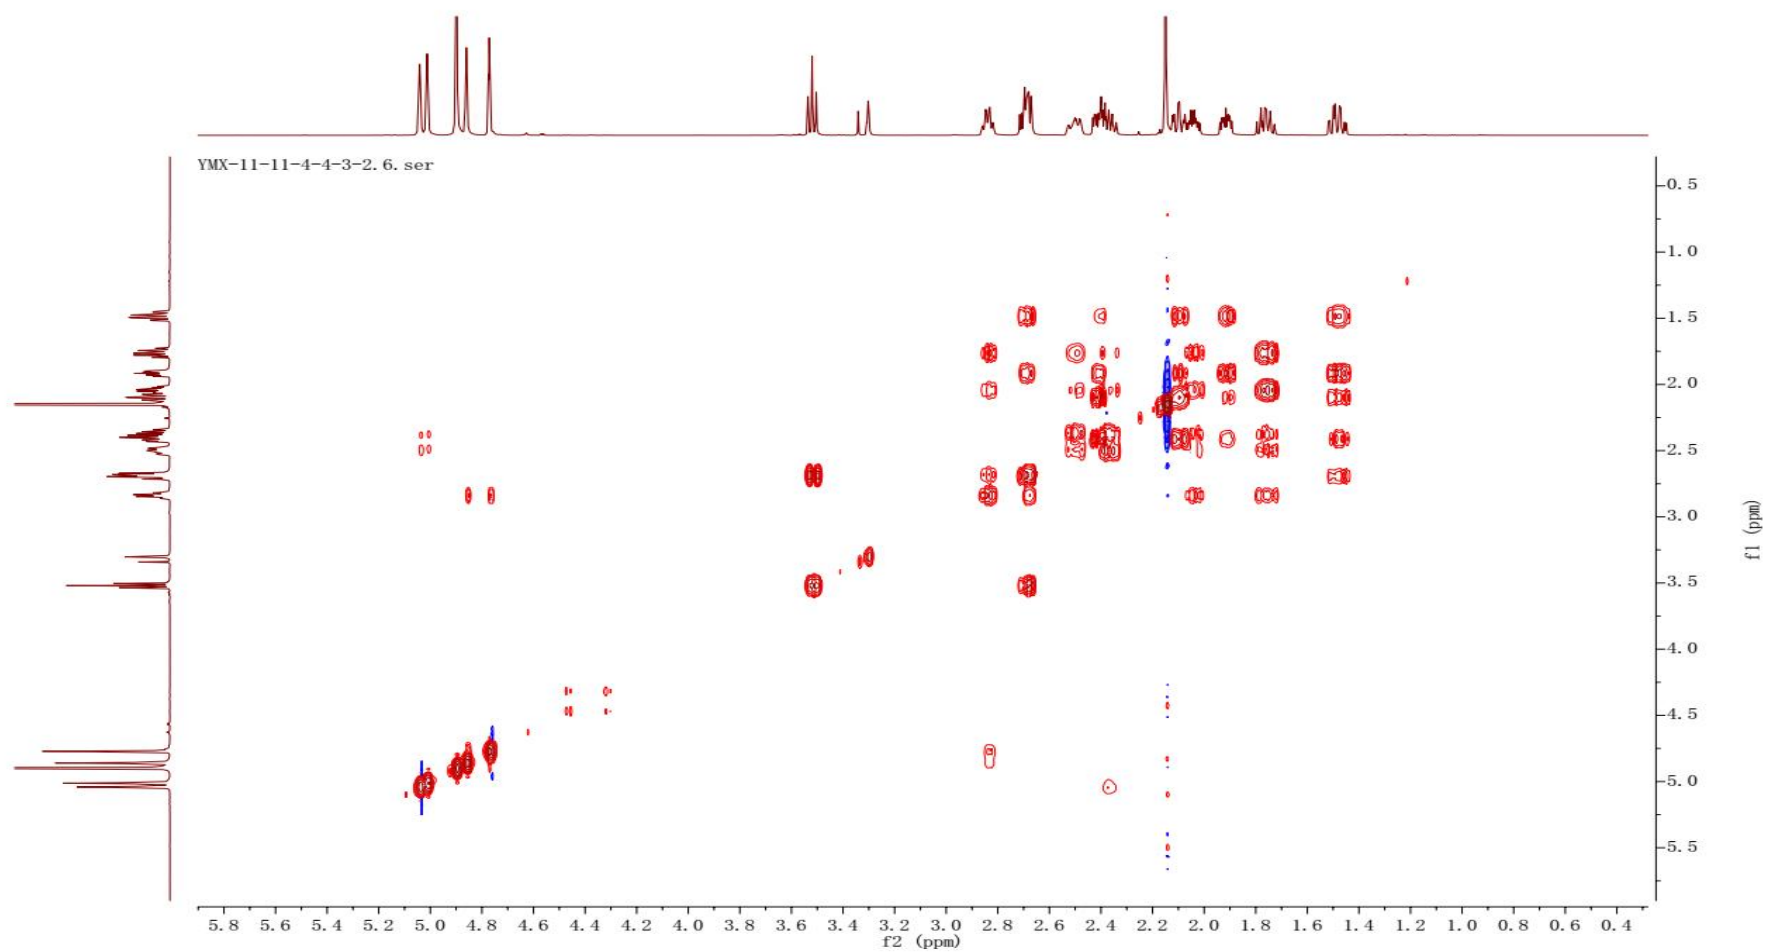

**Figure S4.**  $^1\text{H}$ - $^1\text{H}$  COSY spectrum of compound **1** ( $\text{CD}_3\text{OD}$ , 600 MHz)

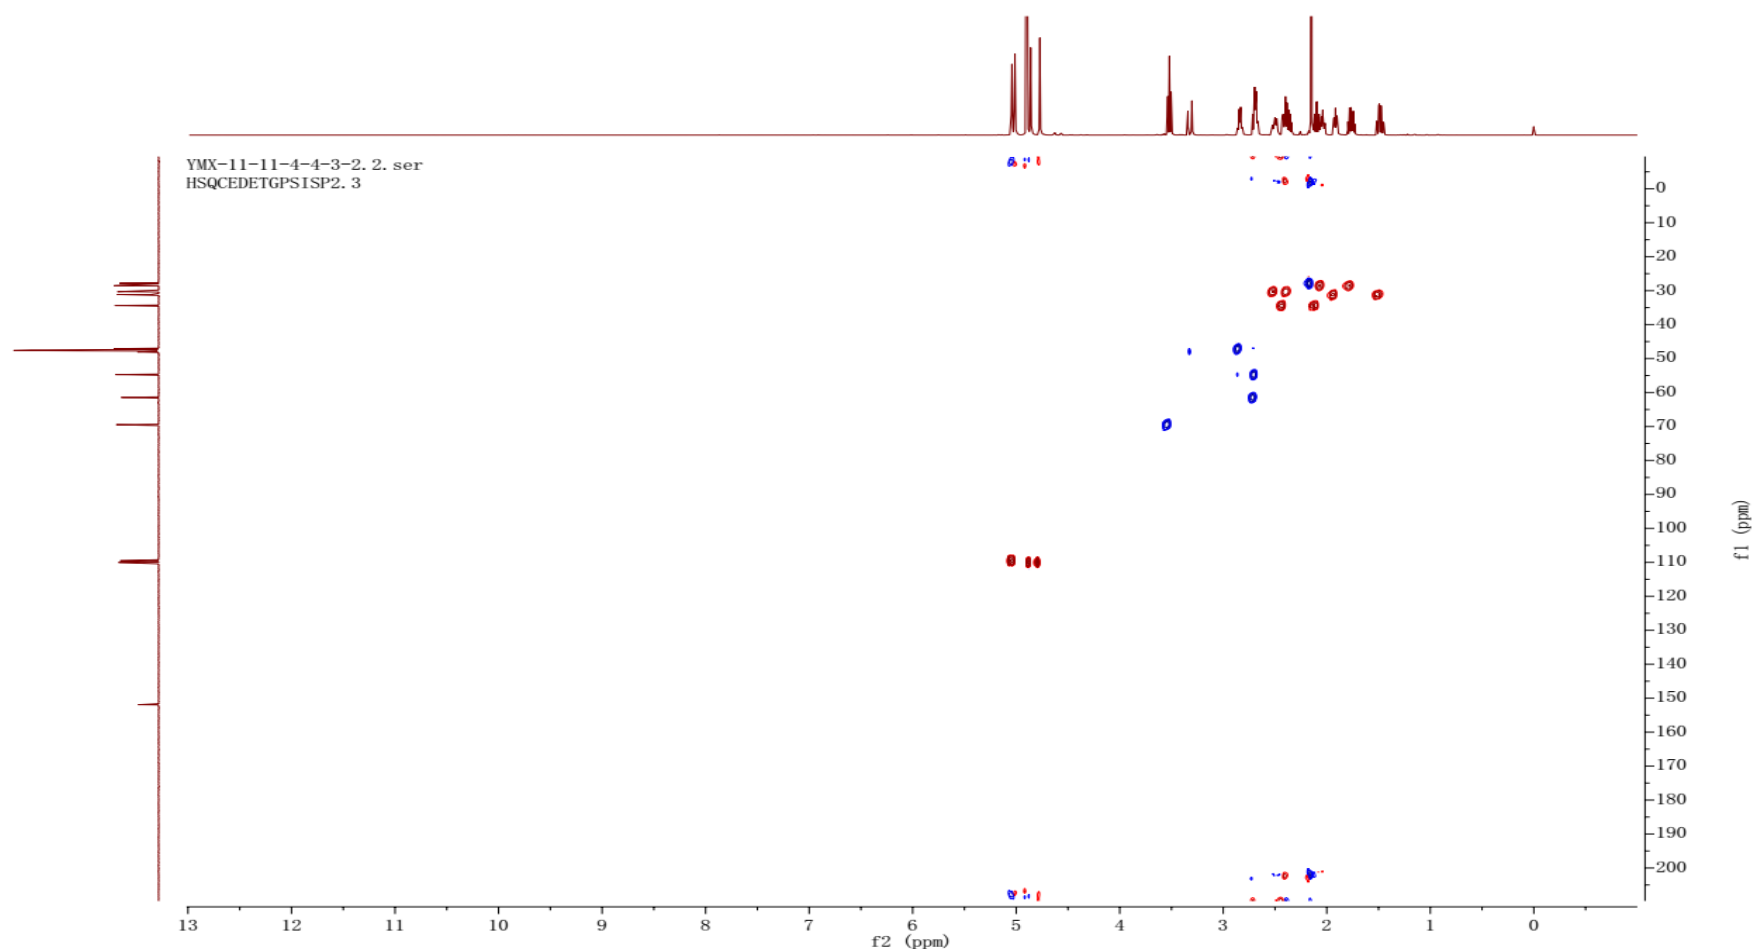

**Figure S5.** HSQC spectrum of compound **1** (CD<sub>3</sub>OD, 600 MHz)

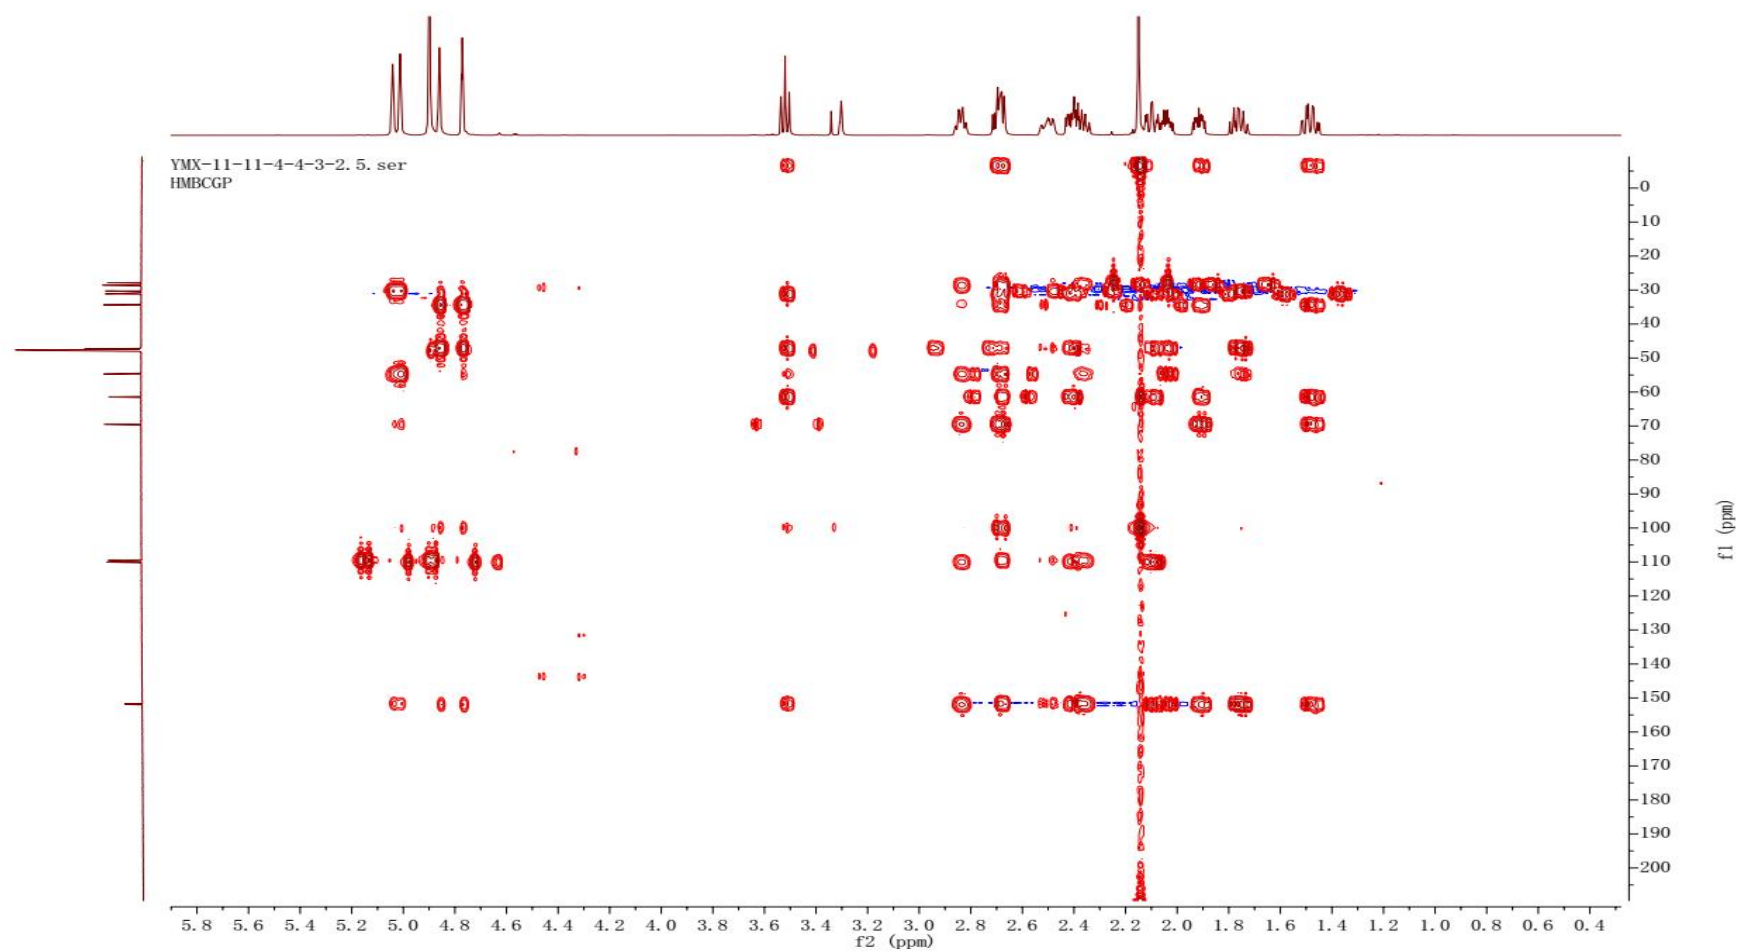

**Figure S6.** HMBC spectrum of compound **1** (CD<sub>3</sub>OD, 600 MHz)

## Qualitative Analysis Report

|                               |                             |                      |                       |
|-------------------------------|-----------------------------|----------------------|-----------------------|
| <b>Data Filename</b>          | YMX-11-11-4-4-3-2.d         | <b>Sample Name</b>   | YMX-11-11-4-4-3-2     |
| <b>Sample Type</b>            | Sample                      | <b>Position</b>      | p1b2                  |
| <b>Instrument Name</b>        | Instrument 1                | <b>User Name</b>     | Q-TOF-HP\Q-TOF        |
| <b>Acq Method</b>             | default20190111-ms.m        | <b>Acquired Time</b> | 1/12/2020 12:37:26 AM |
| <b>IRM Calibration Status</b> | Success                     | <b>DA Method</b>     | 1.m                   |
| <b>Comment</b>                |                             |                      |                       |
| <b>Sample Group</b>           | 6200 series TOF/6500 series | <b>Info.</b>         |                       |
| <b>Acquisition SW</b>         | Q-TOF B.05.01 (B5125.3)     |                      |                       |
| <b>Version</b>                |                             |                      |                       |

### User Chromatograms

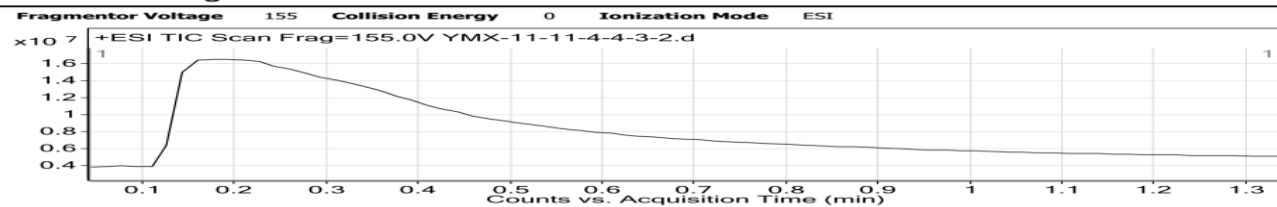

### User Spectra

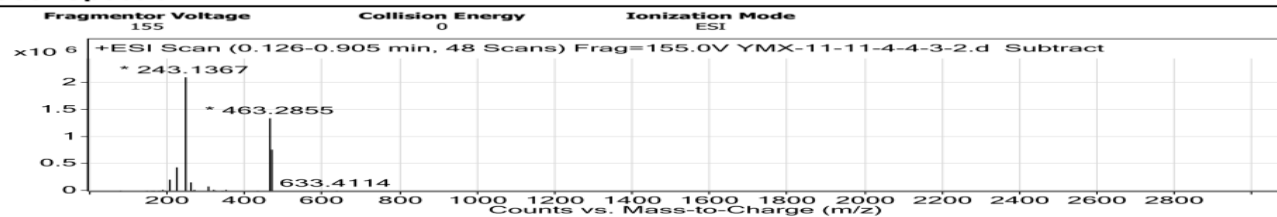

### Peak List

| m/z      | z | Abund      |
|----------|---|------------|
| 203.1421 | 1 | 217932.42  |
| 221.1527 | 1 | 446446.97  |
| 243.1367 | 1 | 2108812    |
| 243.2699 | 1 | 151521.28  |
| 244.1382 | 1 | 518419.28  |
| 259.1082 | 1 | 160975.52  |
| 463.2855 | 1 | 1355956.25 |
| 463.464  | 1 | 123497.32  |

Figure S7. HRESI spectrum of compound 1

YMX-11-11-4-4-3-2

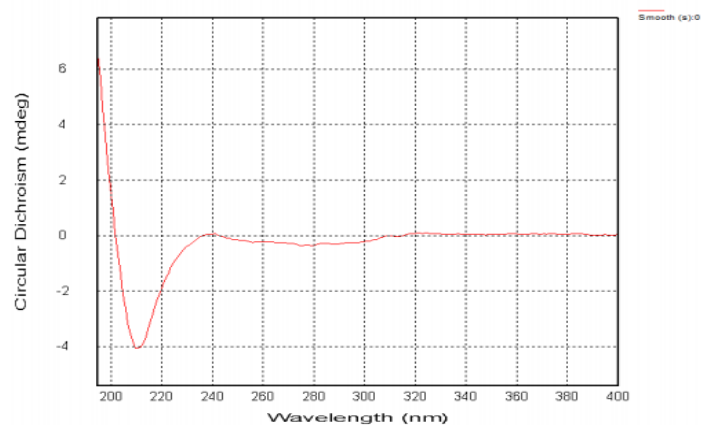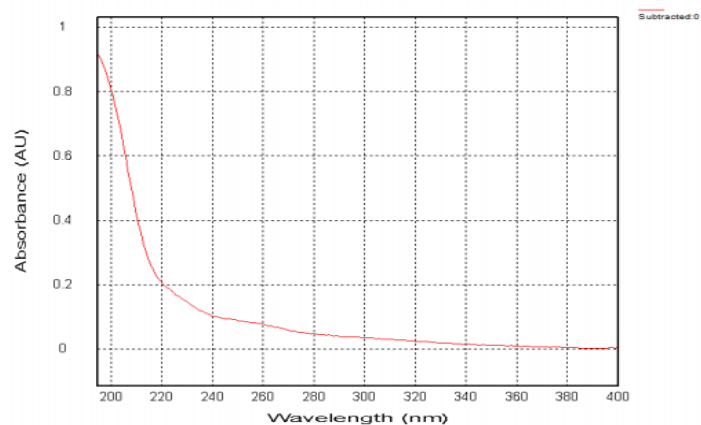

File: YMX-11-11-4-4-3-2 (195-400 nm) 20112718.dsx

ProBinaryX

Attributes :

- Time Stamp : Fri Nov 27 19:51:12 2020

- File ID : {A8234499-FCB9-4b69-BBF6-E4E19927A8D4}

- Is CFR Compliant : false

- Original data has not been modified.

Remarks:

- User: CD

- Date: 2020/11/27

- Instrument: 0547

- DetectorType: LAAPD

- DichOS Calibration Correction Curve: 0547/2

- HV (CDDC channel): 0 v

- Time per point: 1 s

- Description: Sample 1

- Concentration: 0.1680mg/mL MeOH

- Pathlength: 1 mm

- Temperature: 20°C

Settings:

- Time-per-point: 1s (25us x 40000)

- SE

- Wavelength: 195nm - 400nm

- Step Size: 1nm

- Bandwidth: 1nm

**Figure S8.** CD and UV spectrum of compound **1**

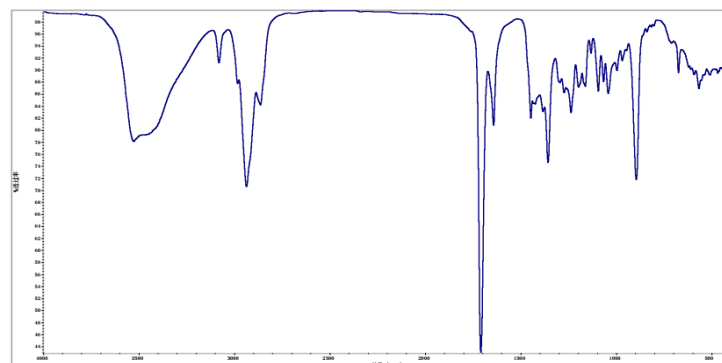

Sample Name: YMX-11-11-4-4-3-2  
KBr压片  
采集时间: 星期三 10月 28 16:21:54 2020 (GMT+08:00)  
仪器型号: NICOLET iS10  
Software version: OMNIC 9.8.372

样品扫描次数: 16  
背景扫描次数: 16  
分辨率: 4.000  
采样增益: 1.0  
扫描速度: 0.4747  
光阑: 80.00

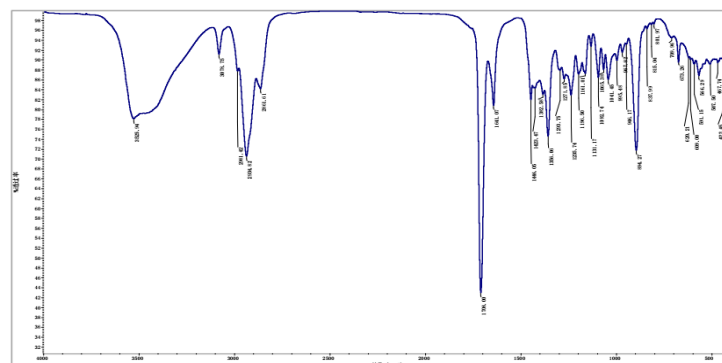

Sample Name: YMX-11-11-4-4-3-2  
KBr压片  
采集时间: 星期三 10月 28 16:21:54 2020 (GMT+08:00)  
仪器型号: NICOLET iS10  
Software version: OMNIC 9.8.372

样品扫描次数: 16  
背景扫描次数: 16  
分辨率: 4.000  
采样增益: 1.0  
扫描速度: 0.4747  
光阑: 80.00

星期三 10月 28 16:28:45 2020 (GMT+08:00)

标峰:

谱图: YMX-11-11-4-4-3-2  
范围: 4000.00 400.00  
(绝对) 阈值: 97.507  
灵敏度: 99

峰表:

|      |         |     |        |
|------|---------|-----|--------|
| 峰位置: | 410.06  | 强度: | 91.307 |
| 峰位置: | 420.72  | 强度: | 91.303 |
| 峰位置: | 435.26  | 强度: | 90.300 |
| 峰位置: | 444.53  | 强度: | 90.177 |
| 峰位置: | 467.74  | 强度: | 89.349 |
| 峰位置: | 507.50  | 强度: | 89.121 |
| 峰位置: | 566.29  | 强度: | 86.817 |
| 峰位置: | 591.15  | 强度: | 89.154 |
| 峰位置: | 609.00  | 强度: | 90.052 |
| 峰位置: | 620.21  | 强度: | 90.420 |
| 峰位置: | 673.26  | 强度: | 89.510 |
| 峰位置: | 709.96  | 强度: | 94.430 |
| 峰位置: | 801.97  | 强度: | 97.265 |
| 峰位置: | 815.04  | 强度: | 97.097 |
| 峰位置: | 837.99  | 强度: | 96.283 |
| 峰位置: | 894.27  | 强度: | 71.654 |
| 峰位置: | 946.17  | 强度: | 93.158 |
| 峰位置: | 967.82  | 强度: | 91.498 |
| 峰位置: | 995.48  | 强度: | 89.847 |
| 峰位置: | 1041.45 | 强度: | 86.025 |
| 峰位置: | 1065.38 | 强度: | 88.027 |
| 峰位置: | 1092.74 | 强度: | 86.427 |
| 峰位置: | 1131.17 | 强度: | 92.740 |
| 峰位置: | 1161.01 | 强度: | 87.220 |
| 峰位置: | 1196.50 | 强度: | 87.110 |
| 峰位置: | 1235.74 | 强度: | 82.836 |
| 峰位置: | 1271.85 | 强度: | 86.159 |
| 峰位置: | 1293.75 | 强度: | 87.843 |
| 峰位置: | 1356.06 | 强度: | 74.534 |
| 峰位置: | 1382.58 | 强度: | 83.024 |
| 峰位置: | 1423.47 | 强度: | 84.289 |
| 峰位置: | 1446.05 | 强度: | 81.823 |
| 峰位置: | 1641.07 | 强度: | 80.757 |
| 峰位置: | 1708.00 | 强度: | 42.918 |
| 峰位置: | 2861.61 | 强度: | 84.143 |
| 峰位置: | 2934.82 | 强度: | 70.524 |
| 峰位置: | 2981.42 | 强度: | 87.694 |
| 峰位置: | 3078.75 | 强度: | 91.125 |
| 峰位置: | 3525.94 | 强度: | 78.053 |

Figure S9. IR spectrum of compound 1

### **Rudolph Research Analytical**

This sample was measured on an Autopol VI, Serial #91058  
Manufactured by Rudolph Research Analytical, Hackettstown, NJ, USA.

Measurement Date : Thursday, 26-NOV-2020

Set Temperature : OFF

Time Delay : Disabled

Delay between Measurement : Disabled

| <u>n</u> | <u>Average</u> | <u>Std.Dev.</u> | <u>% RSD</u> | <u>Maximum</u> | <u>Minimum</u> |
|----------|----------------|-----------------|--------------|----------------|----------------|
| 5        | -30.07         | 0.12            | -0.39        | -29.90         | -30.20         |

| <u>S.No</u> | <u>Sample ID</u> | <u>Time</u> | <u>Result</u> | <u>Scale</u> | <u>OR °Arc</u> | <u>WLG.nm</u> | <u>Lg.mm</u> | <u>Conc.g/100ml</u> | <u>Temp.</u> |
|-------------|------------------|-------------|---------------|--------------|----------------|---------------|--------------|---------------------|--------------|
| 1           | YMX-11-11-4-4-3  | 02:35:47 PM | -30.20        | SR           | -0.0906        | 589           | 100.00       | 0.300               | 23.1         |
| 2           | YMX-11-11-4-4-3  | 02:35:56 PM | -30.13        | SR           | -0.0904        | 589           | 100.00       | 0.300               | 23.1         |
| 3           | YMX-11-11-4-4-3  | 02:36:04 PM | -30.10        | SR           | -0.0903        | 589           | 100.00       | 0.300               | 23.1         |
| 4           | YMX-11-11-4-4-3  | 02:36:12 PM | -29.90        | SR           | -0.0897        | 589           | 100.00       | 0.300               | 23.1         |
| 5           | YMX-11-11-4-4-3  | 02:36:20 PM | -30.00        | SR           | -0.0900        | 589           | 100.00       | 0.300               | 23.1         |

Figure S10.  $[\alpha]^{25}_D$  of compound 1

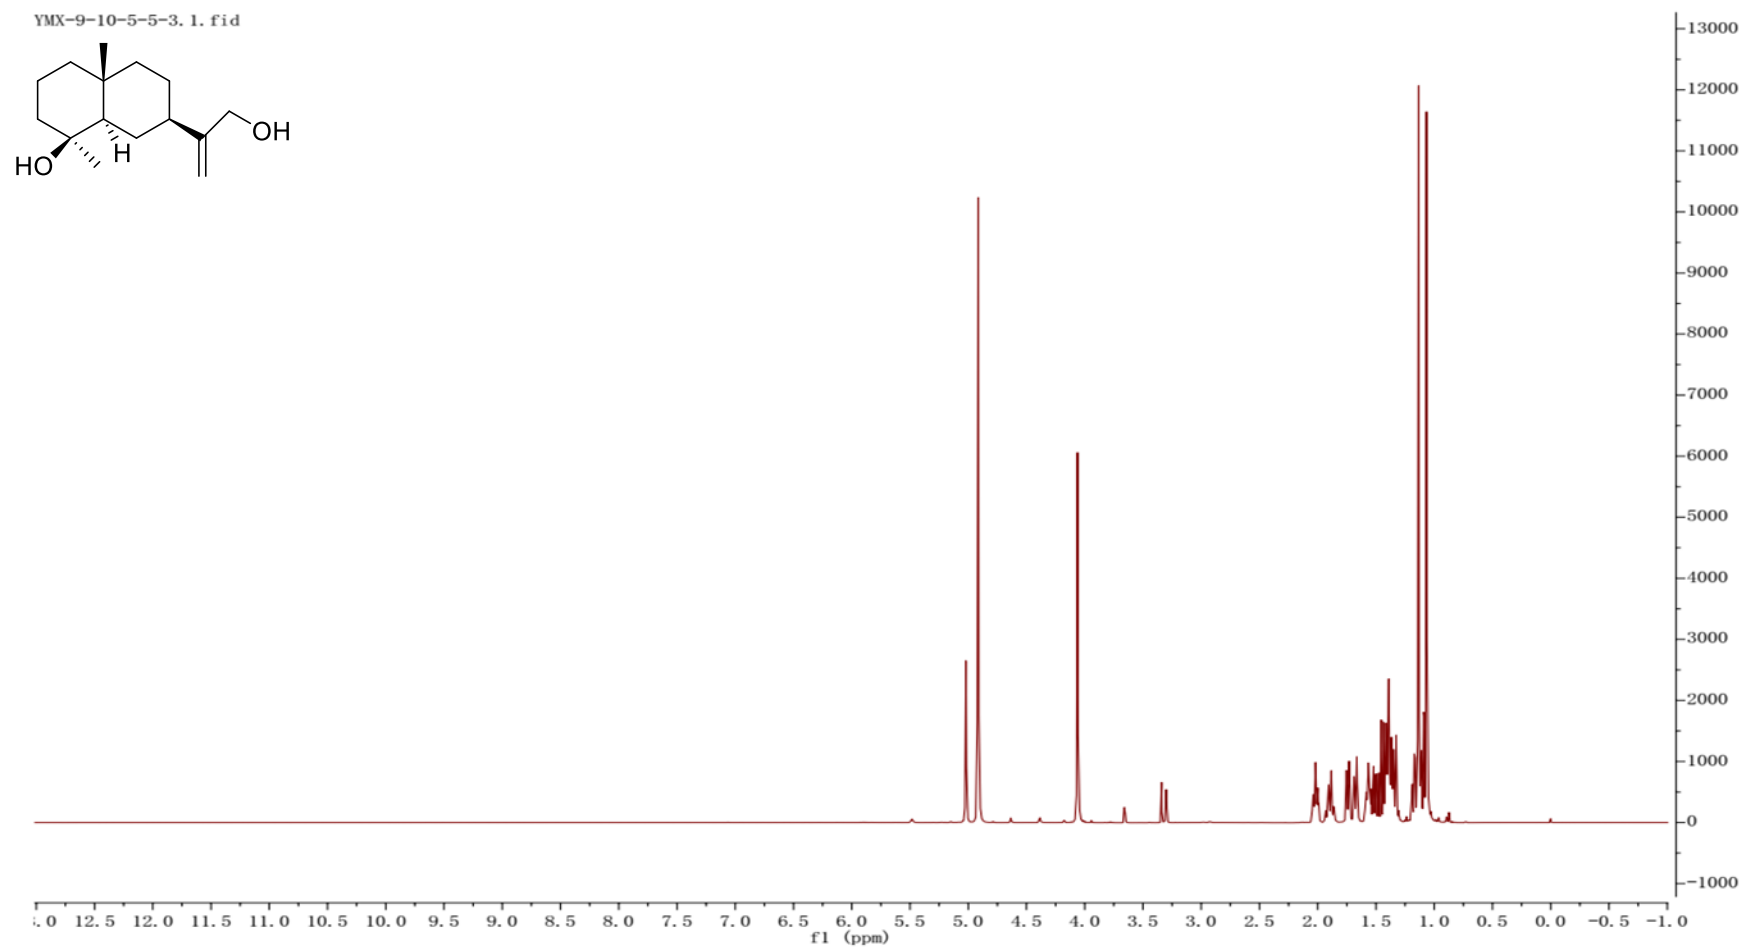

**Figure S11.**  $^1\text{H}$  NMR spectrum of compound **2** ( $\text{CD}_3\text{OD}$ , 600 MHz)

YMX-9-10-5-5-3. 3. fid

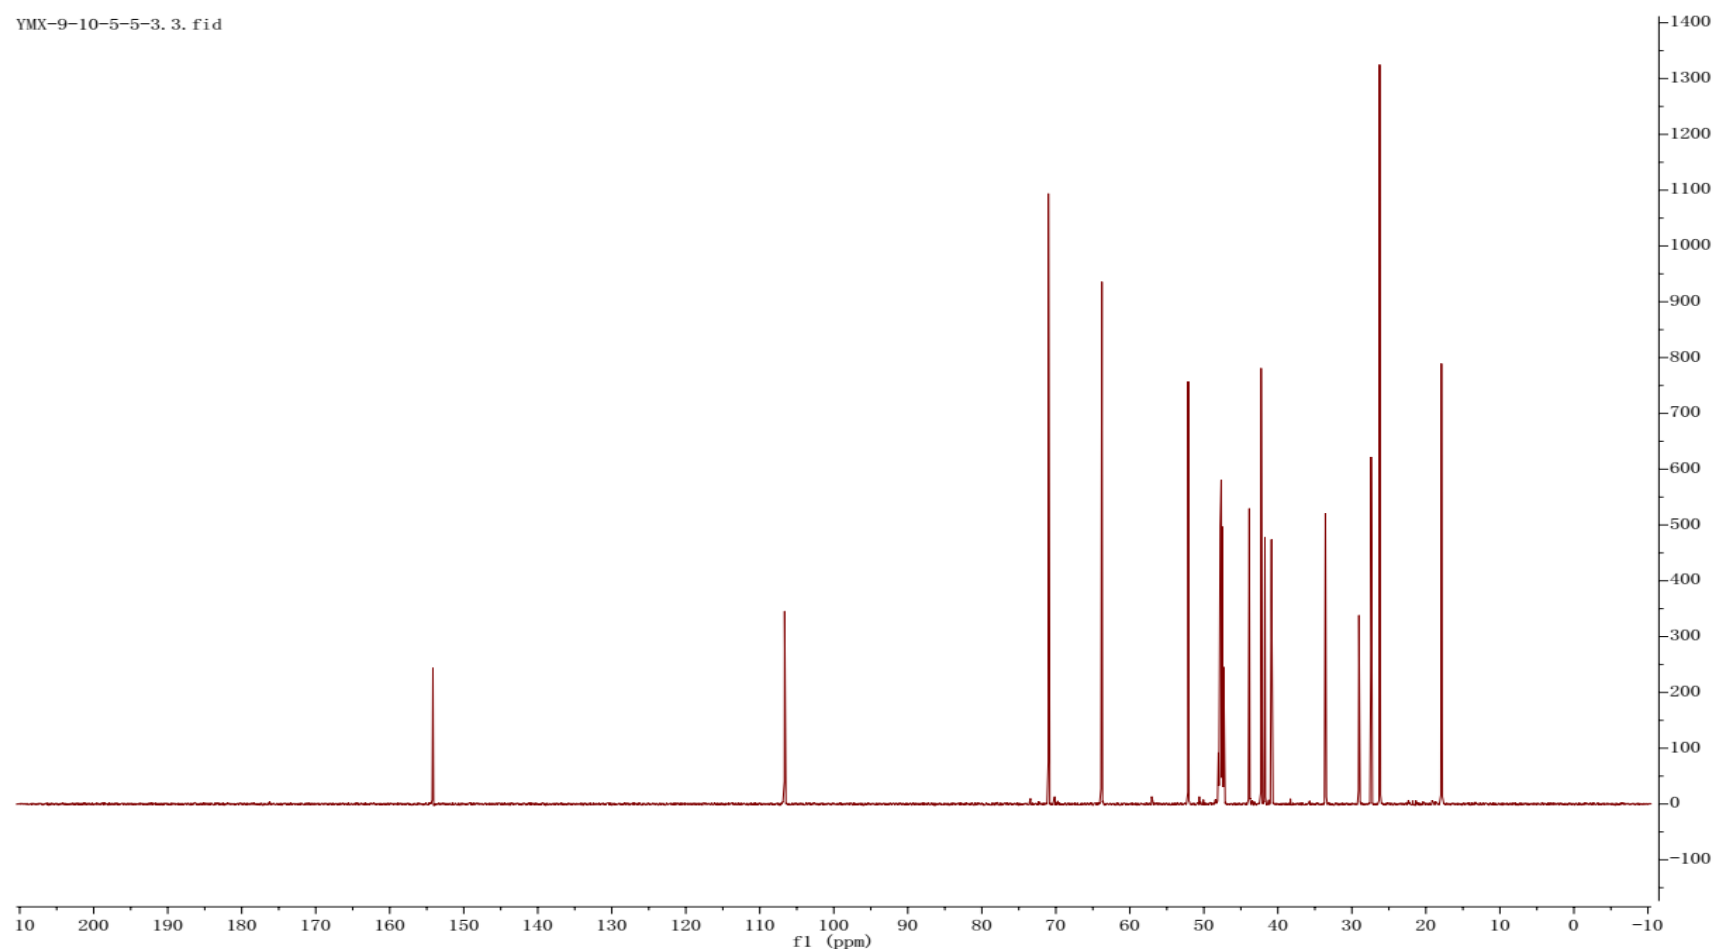

**Figure S12.**  $^{13}\text{C}$  NMR spectrum of compound **2** ( $\text{CD}_3\text{OD}$ , 150 MHz)

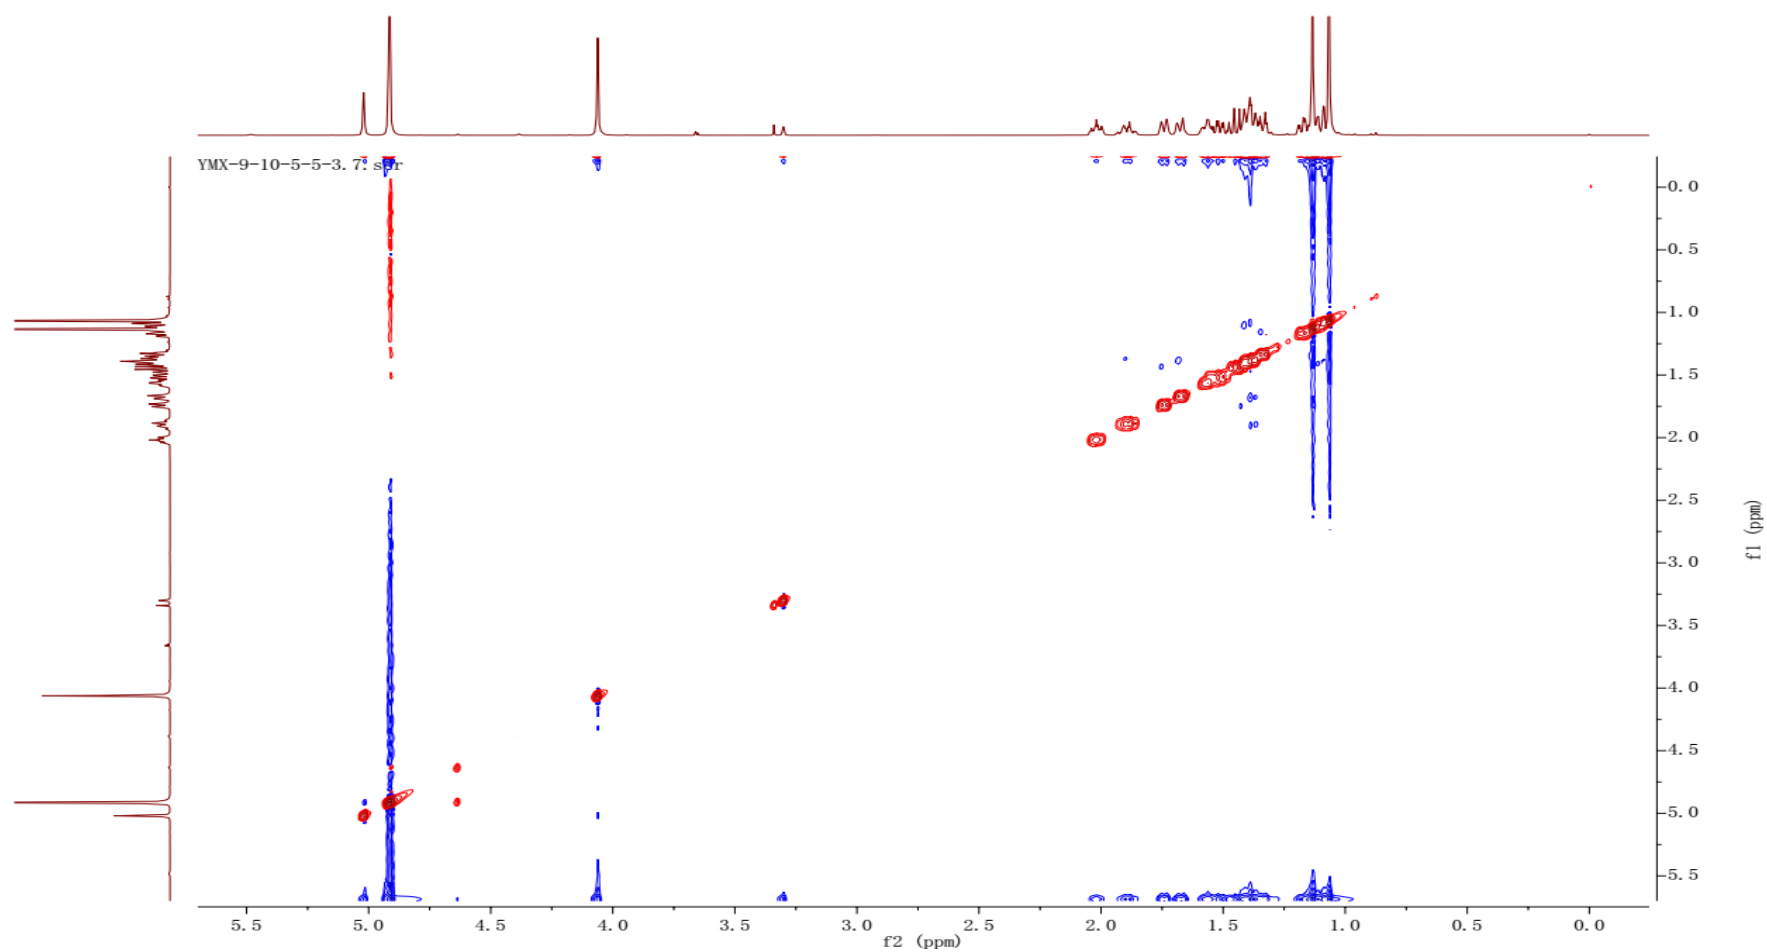

**Figure S13.** ROESY spectrum of compound **2** (CD<sub>3</sub>OD, 600 MHz)

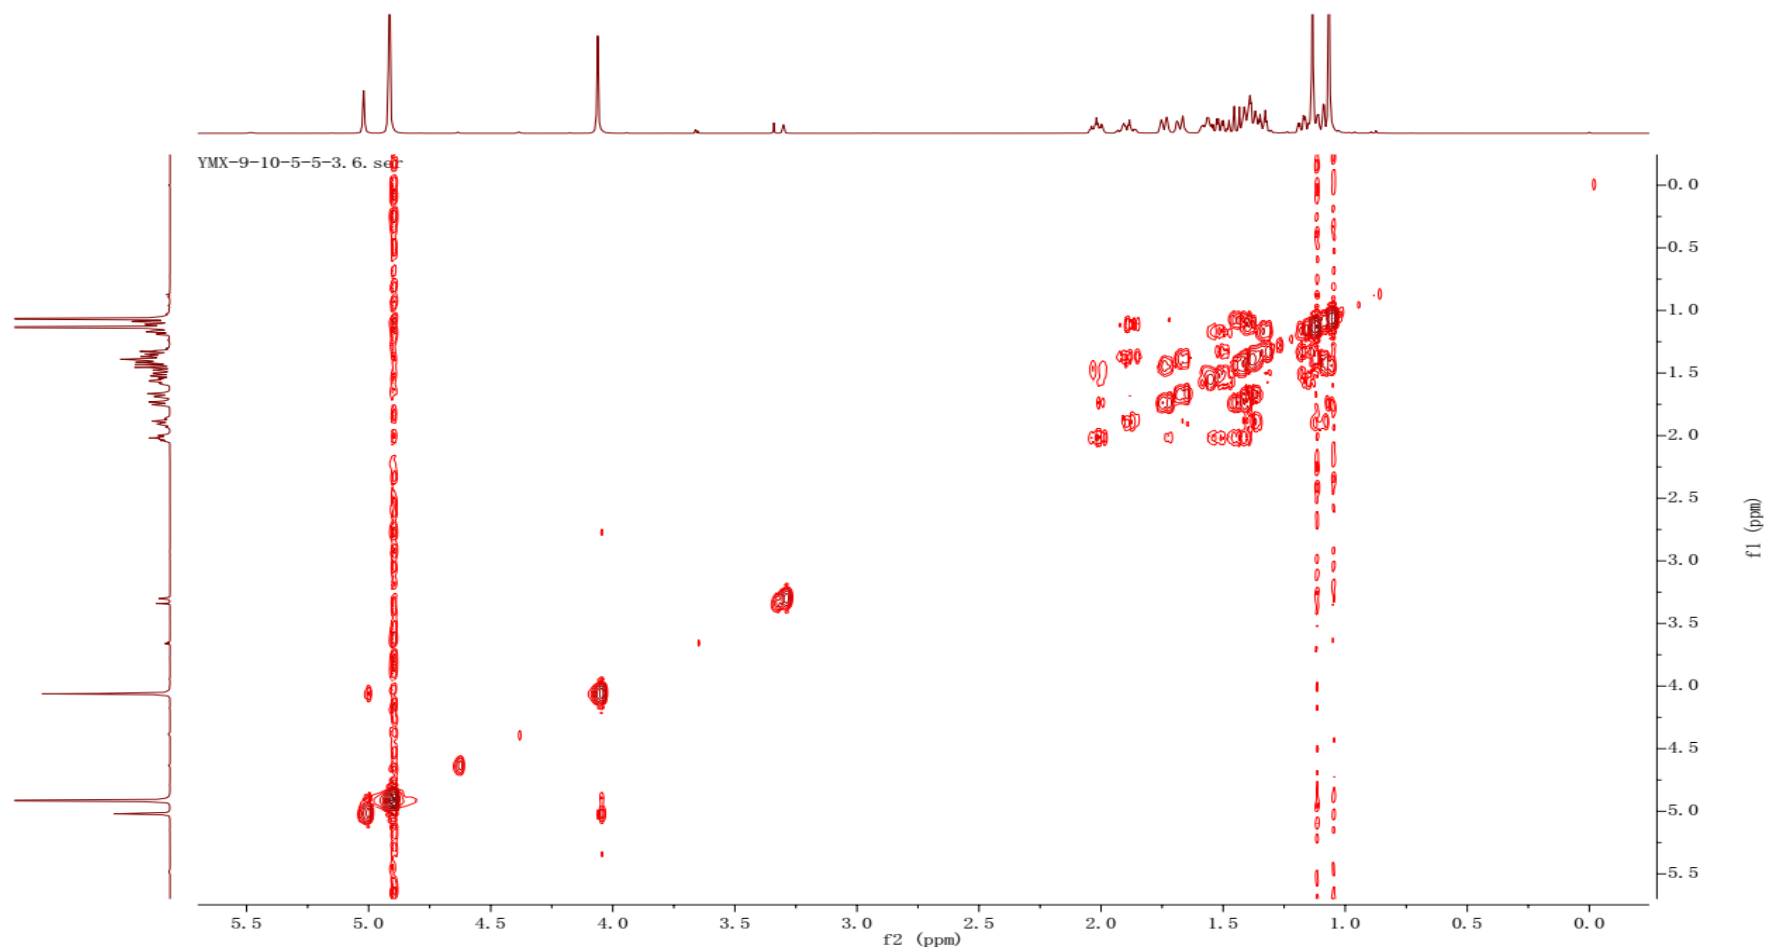

**Figure S14.**  $^1\text{H}$ - $^1\text{H}$  COSY spectrum of compound **2** ( $\text{CD}_3\text{OD}$ , 600 MHz)

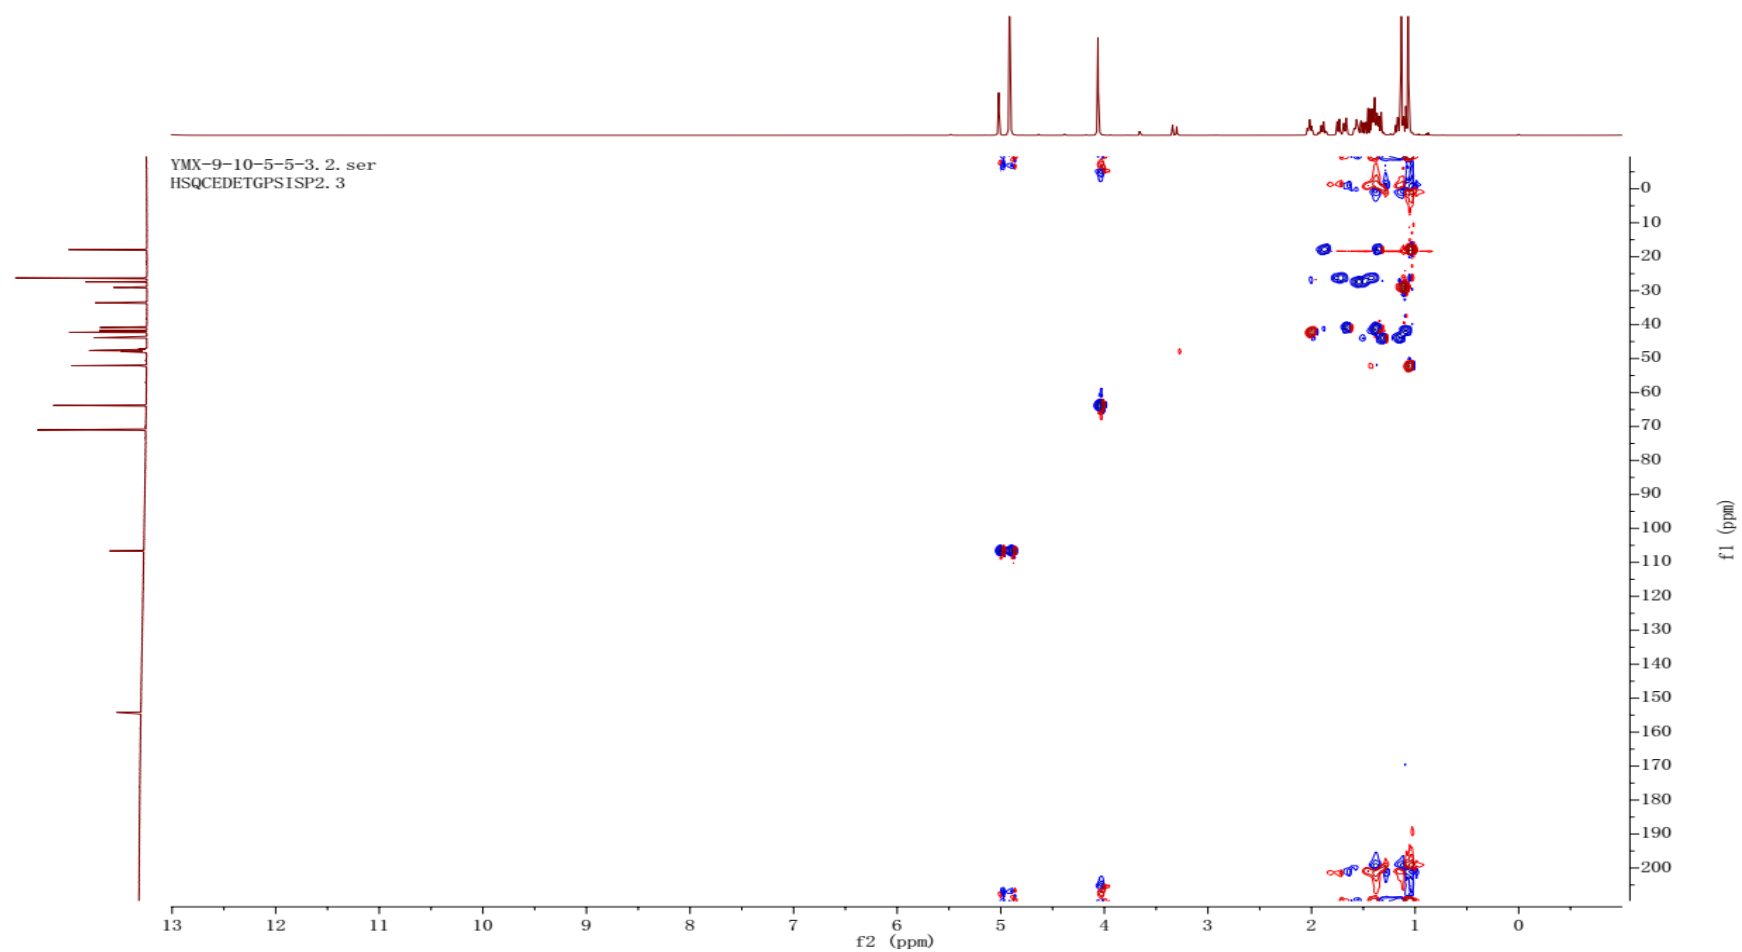

**Figure S15.** HSQC spectrum of compound **2** (CD<sub>3</sub>OD, 600 MHz)

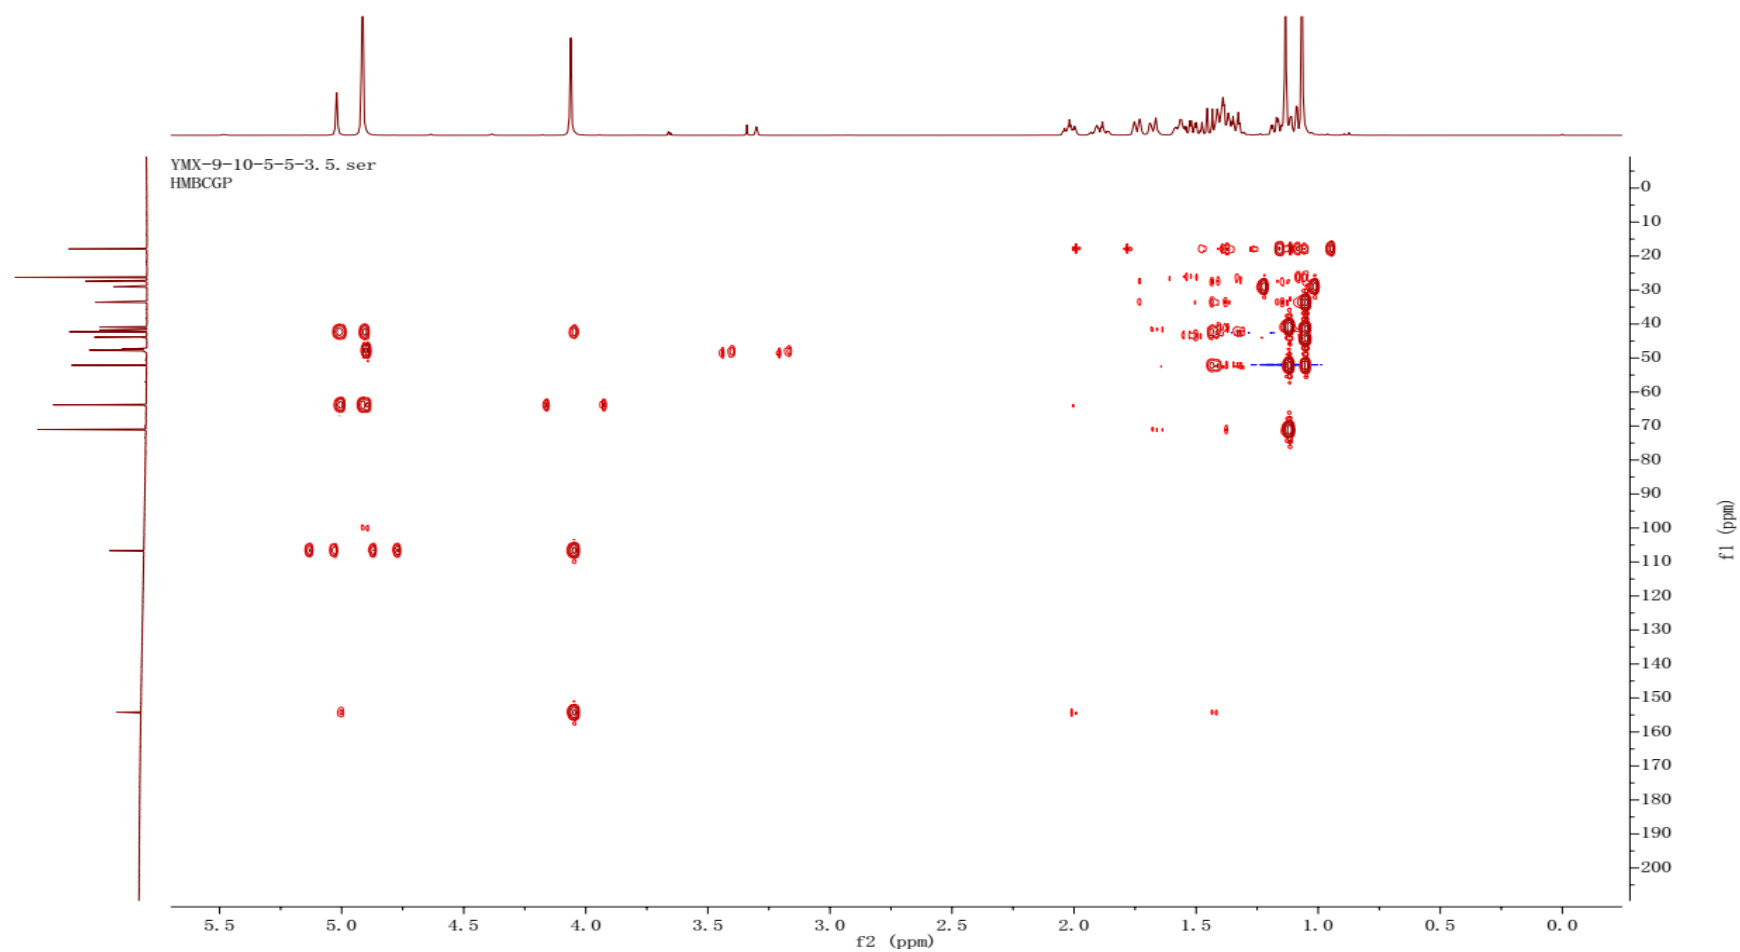

**Figure S16.** HMBC spectrum of compound **2** (CD<sub>3</sub>OD, 600 MHz)

Data File: E:\DATA\2021\0901\YMX-9-10-5-5-3.lcd

| Elmt | Val. | Min | Max | Use Adduct |
|------|------|-----|-----|------|------|-----|-----|------|------|-----|-----|------|------|-----|-----|------------|
| H    | 1    | 5   | 150 | O    | 2    | 0   | 30  | P    | 3    | 0   | 0   | Se   | 2    | 0   | 0   | H          |
| 2H   | 1    | 0   | 0   | F    | 1    | 0   | 0   | S    | 2    | 0   | 0   | Br   | 1    | 0   | 0   | Na         |
| B    | 3    | 0   | 0   | Na   | 1    | 0   | 0   | Cl   | 1    | 0   | 0   | Pd   | 2    | 0   | 0   |            |
| C    | 4    | 5   | 100 | Mg   | 2    | 0   | 0   | Co   | 2    | 0   | 0   | Ag   | 1    | 0   | 0   |            |
| N    | 3    | 0   | 10  | Si   | 4    | 0   | 0   | Cu   | 2    | 0   | 0   | I    | 3    | 0   | 0   |            |

Error Margin (ppm): 5

HC Ratio: unlimited

Max Isotopes: all

MSn Iso RI (%): 75.00

DBE Range: not fixed

Apply N Rule: yes

Isotope RI (%): 1.00

MSn Logic Mode: OR

Electron Ions: both

Use MSn Info: yes

Isotope Res: 10000

Max Results: 20

Event#: 1 MS(E+) Ret. Time : 0.280 -&gt; 1.000 Scan#: 43 -&gt; 151

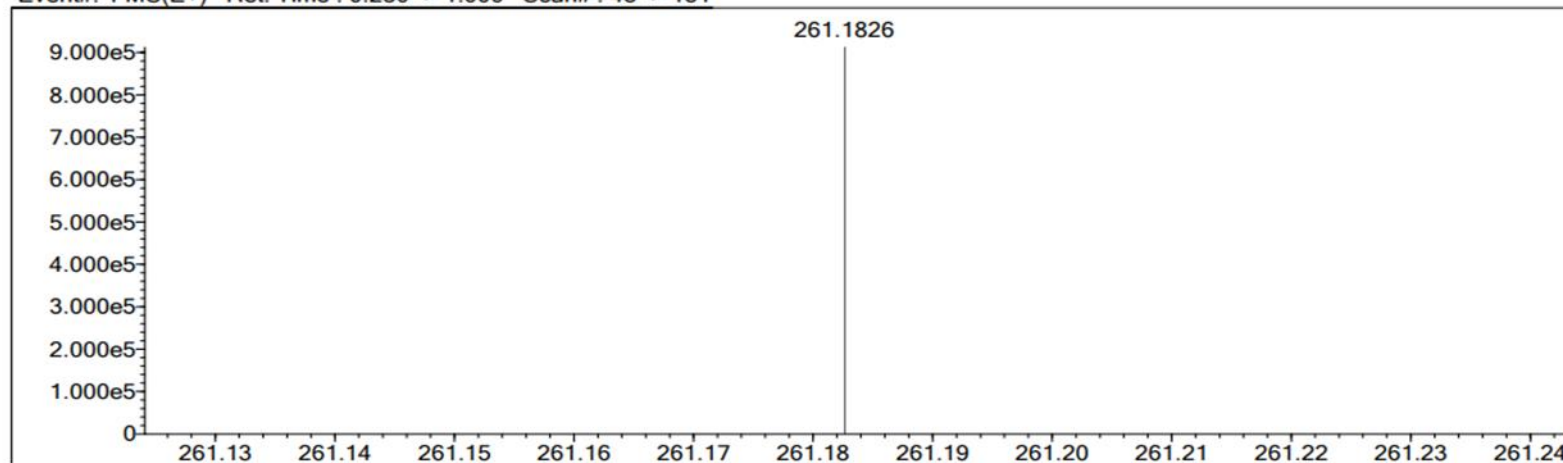

Figure S17. HRESI spectrum of compound 2

数据集: YMX-9-10-5-5-3 - RawData

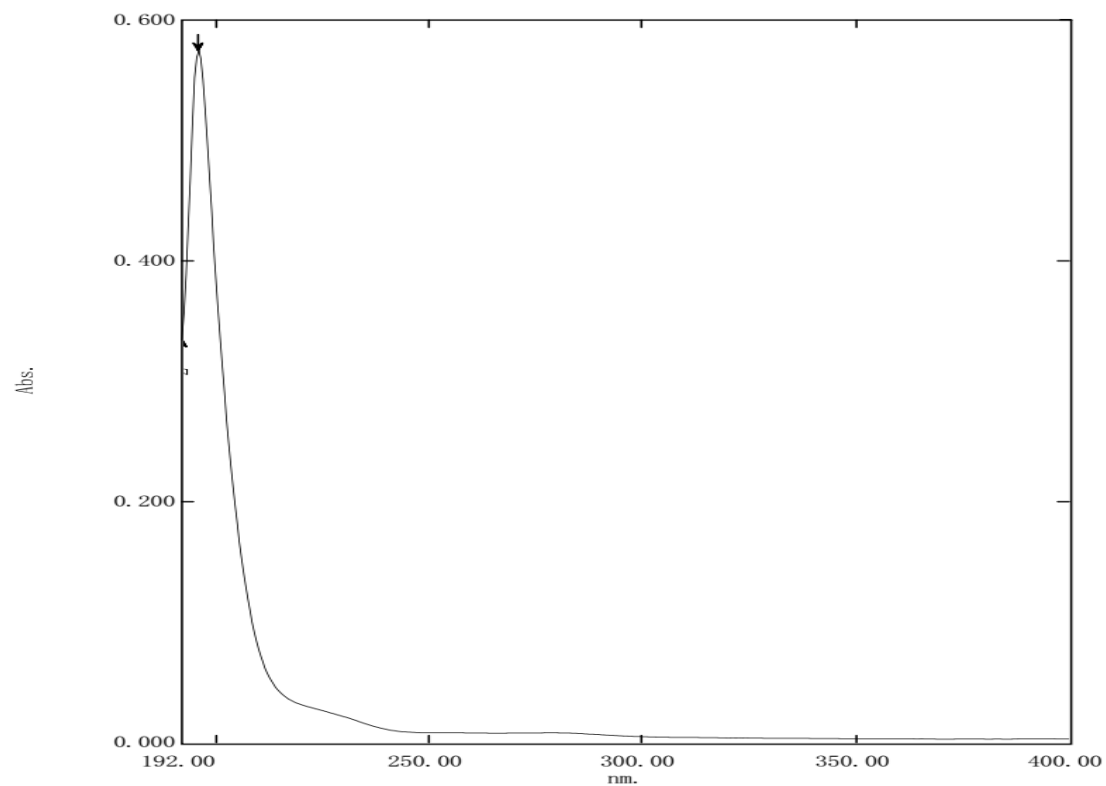

[测定属性]  
 波长范围(nm): 190.00 到 600.00  
 扫描速度: 中速  
 采样间隔: 0.5  
 自动采样间隔: 停用  
 扫描模式: 单个

[仪器属性]  
 仪器类型: UV-2700 系列  
 测定方式: 吸收值  
 狭缝宽: 5.0 nm  
 积分时间: 0.1 秒  
 光源转换波长: 323.0 nm  
 检测器单元: 直接  
 S/R 转换: 标准  
 阶梯校正: OFF

[附件属性]  
 附件: 无

[数据处理参数]  
 阈值: 0.0010000  
 点: 4  
 内插: 停用  
 平均: 停用

[样品准备属性]  
 重量:  
 体积:  
 稀释:  
 光程长: 10mm  
 附加信息: 样品浓度: 0.0300毫克/毫升  
 溶剂: 甲醇

| No. | P/V | 波长 (nm) | Abs.  | 描述 |
|-----|-----|---------|-------|----|
| 1   | ⬆   | 196.00  | 0.575 |    |
| 2   | ⬇   | 192.00  | 0.334 |    |

Figure S18. CD and UV spectrum of compound 2

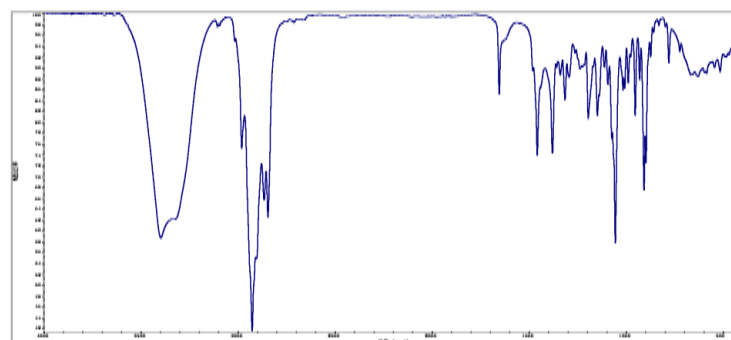

Sample Name: YMX-9-10-5-5-3  
KBr压片  
采集时间: 星期四 11月 19 10:11:27 2020 (GMT+08:00)  
仪器型号: NICOLET IS10  
Software version: OMNIC 9.8.372

样品扫描次数: 16  
背景扫描次数: 16  
分辨率: 4.000  
采样增益: 1.0  
功能速度: 0.4747  
光阑: 80.00

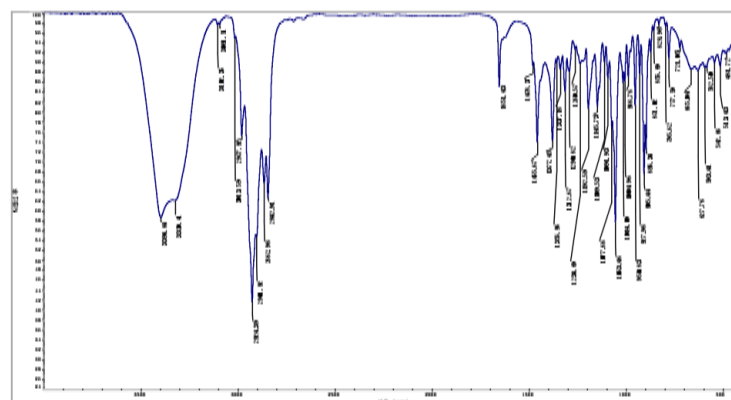

Sample Name: YMX-9-10-5-5-3  
KBr压片  
采集时间: 星期四 11月 19 10:11:27 2020 (GMT+08:00)  
仪器型号: NICOLET IS10  
Software version: OMNIC 9.8.372

样品扫描次数: 16  
背景扫描次数: 16  
分辨率: 4.000  
采样增益: 1.0  
功能速度: 0.4747  
光阑: 80.00

星期四 11月 19 10:21:41 2020 (GMT+08:00)

标峰:  
谱图: YMX-9-10-5-5-3  
范围: 4000.00 400.00  
(绝对) 阈值: 98.492  
灵敏度: 99

|      |         |     |        |
|------|---------|-----|--------|
| 峰位置: | 402.81  | 强度: | 94.327 |
| 峰位置: | 413.95  | 强度: | 93.904 |
| 峰位置: | 438.18  | 强度: | 93.018 |
| 峰位置: | 450.90  | 强度: | 93.137 |
| 峰位置: | 467.24  | 强度: | 92.399 |
| 峰位置: | 481.72  | 强度: | 91.910 |
| 峰位置: | 513.43  | 强度: | 89.238 |
| 峰位置: | 542.68  | 强度: | 89.996 |
| 峰位置: | 582.50  | 强度: | 88.953 |
| 峰位置: | 593.41  | 强度: | 89.100 |
| 峰位置: | 627.78  | 强度: | 88.386 |
| 峰位置: | 665.04  | 强度: | 88.640 |
| 峰位置: | 721.05  | 强度: | 92.924 |
| 峰位置: | 777.59  | 强度: | 90.905 |
| 峰位置: | 795.62  | 强度: | 97.539 |
| 峰位置: | 828.98  | 强度: | 97.784 |
| 峰位置: | 855.89  | 强度: | 96.464 |
| 峰位置: | 871.02  | 强度: | 92.053 |
| 峰位置: | 895.34  | 强度: | 72.446 |
| 峰位置: | 905.44  | 强度: | 67.441 |
| 峰位置: | 927.98  | 强度: | 87.806 |
| 峰位置: | 950.83  | 强度: | 81.284 |
| 峰位置: | 974.22  | 强度: | 92.030 |
| 峰位置: | 986.76  | 强度: | 87.135 |
| 峰位置: | 1004.96 | 强度: | 86.176 |
| 峰位置: | 1014.09 | 强度: | 85.855 |
| 峰位置: | 1053.46 | 强度: | 57.686 |
| 峰位置: | 1071.52 | 强度: | 76.920 |
| 峰位置: | 1091.93 | 强度: | 86.914 |
| 峰位置: | 1109.53 | 强度: | 90.065 |
| 峰位置: | 1145.73 | 强度: | 81.207 |
| 峰位置: | 1192.59 | 强度: | 80.634 |
| 峰位置: | 1236.25 | 强度: | 89.819 |
| 峰位置: | 1260.57 | 强度: | 92.719 |
| 峰位置: | 1290.82 | 强度: | 88.204 |
| 峰位置: | 1312.67 | 强度: | 84.129 |
| 峰位置: | 1337.18 | 强度: | 88.586 |
| 峰位置: | 1355.98 | 强度: | 89.997 |
| 峰位置: | 1377.45 | 强度: | 74.205 |
| 峰位置: | 1455.67 | 强度: | 73.854 |
| 峰位置: | 1478.37 | 强度: | 89.459 |
| 峰位置: | 1651.43 | 强度: | 85.112 |
| 峰位置: | 2710.46 | 强度: | 98.337 |
| 峰位置: | 2842.91 | 强度: | 62.505 |
| 峰位置: | 2862.98 | 强度: | 65.579 |
| 峰位置: | 2901.92 | 强度: | 54.765 |
| 峰位置: | 2924.39 | 强度: | 41.457 |
| 峰位置: | 2977.92 | 强度: | 75.158 |
| 峰位置: | 3013.59 | 强度: | 94.910 |
| 峰位置: | 3091.51 | 强度: | 97.722 |
| 峰位置: | 3102.35 | 强度: | 97.548 |
| 峰位置: | 3394.64 | 强度: | 58.607 |

Figure S19. IR spectrum of compound 2

### **Rudolph Research Analytical**

This sample was measured on an Autopol VI, Serial #91058  
Manufactured by Rudolph Research Analytical, Hackettstown, NJ, USA.

Measurement Date : Thursday, 26-NOV-2020

Set Temperature : OFF

Time Delay : Disabled

Delay between Measurement : Disabled

| <u>n</u>    | <u>Average</u>   | <u>Std.Dev.</u> | <u>% RSD</u>  | <u>Maximum</u> | <u>Minimum</u> |               |              |                     |              |  |
|-------------|------------------|-----------------|---------------|----------------|----------------|---------------|--------------|---------------------|--------------|--|
| 5           | -12.20           | 0.31            | -2.54         | -11.87         | -12.67         |               |              |                     |              |  |
| <u>S.No</u> | <u>Sample ID</u> | <u>Time</u>     | <u>Result</u> | <u>Scale</u>   | <u>OR °Arc</u> | <u>WLG.nm</u> | <u>Lg.mm</u> | <u>Conc.g/100ml</u> | <u>Temp.</u> |  |
| 1           | YMX-9-10-5-5-3   | 03:30:04 PM     | -12.67        | SR             | -0.0190        | 589           | 100.00       | 0.150               | 23.2         |  |
| 2           | YMX-9-10-5-5-3   | 03:30:13 PM     | -12.33        | SR             | -0.0185        | 589           | 100.00       | 0.150               | 23.2         |  |
| 3           | YMX-9-10-5-5-3   | 03:30:21 PM     | -12.07        | SR             | -0.0181        | 589           | 100.00       | 0.150               | 23.2         |  |
| 4           | YMX-9-10-5-5-3   | 03:30:29 PM     | -11.87        | SR             | -0.0178        | 589           | 100.00       | 0.150               | 23.2         |  |
| 5           | YMX-9-10-5-5-3   | 03:30:37 PM     | -12.07        | SR             | -0.0181        | 589           | 100.00       | 0.150               | 23.2         |  |

Figure S20.  $[\alpha]^{25}_D$  of compound 2

Crystal data for xm7:  $C_{15}H_{26}O_2$ ,  $M = 238.36$ ,  $a = 12.1080(3) \text{ \AA}$ ,  $b = 6.30390(10) \text{ \AA}$ ,  $c = 18.5396(4) \text{ \AA}$ ,  $\alpha = 90^\circ$ ,  $\beta = 94.6690(10)^\circ$ ,  $\gamma = 90^\circ$ ,  $V = 1410.39(5) \text{ \AA}^3$ ,  $T = 100.(2) \text{ K}$ , space group  $P1211$ ,  $Z = 4$ ,  $\mu(\text{Cu K}\alpha) = 0.560 \text{ mm}^{-1}$ , 30099 reflections measured, 5508 independent reflections ( $R_{int} = 0.0467$ ). The final  $R_I$  values were 0.0312 ( $I > 2\sigma(I)$ ). The final  $wR(F^2)$  values were 0.0785 ( $I > 2\sigma(I)$ ). The final  $R_I$  values were 0.0320 (all data). The final  $wR(F^2)$  values were 0.0792 (all data). The goodness of fit on  $F^2$  was 1.078. Flack parameter = 0.03(5).

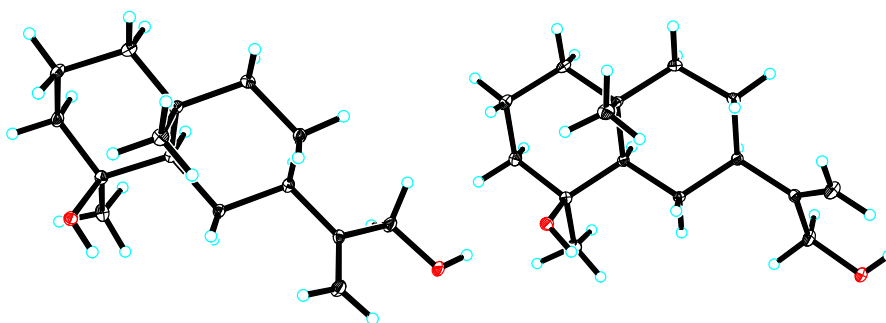

View of the molecules in an asymmetric unit.

Displacement ellipsoids are drawn at the 30% probability level.

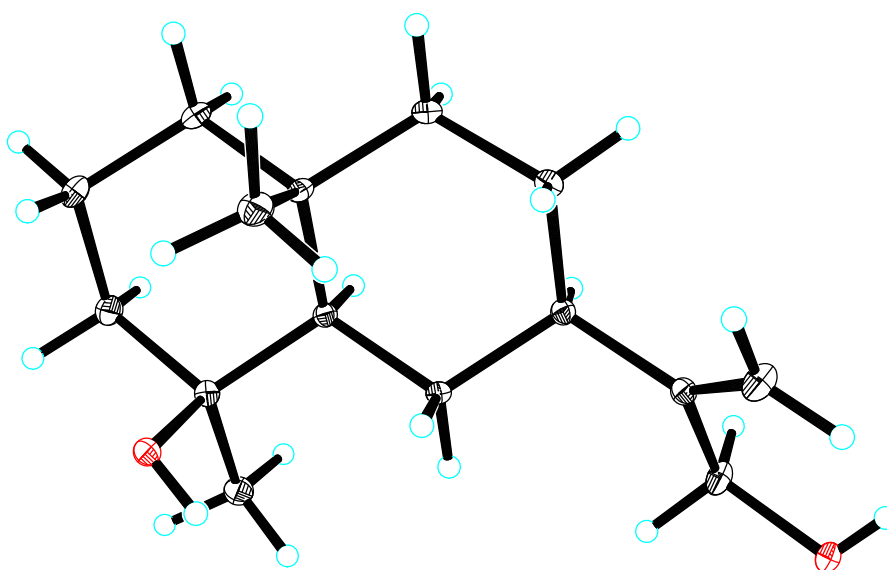

View of a molecule of xm7 with the atom-labelling scheme.

Displacement ellipsoids are drawn at the 30% probability level.

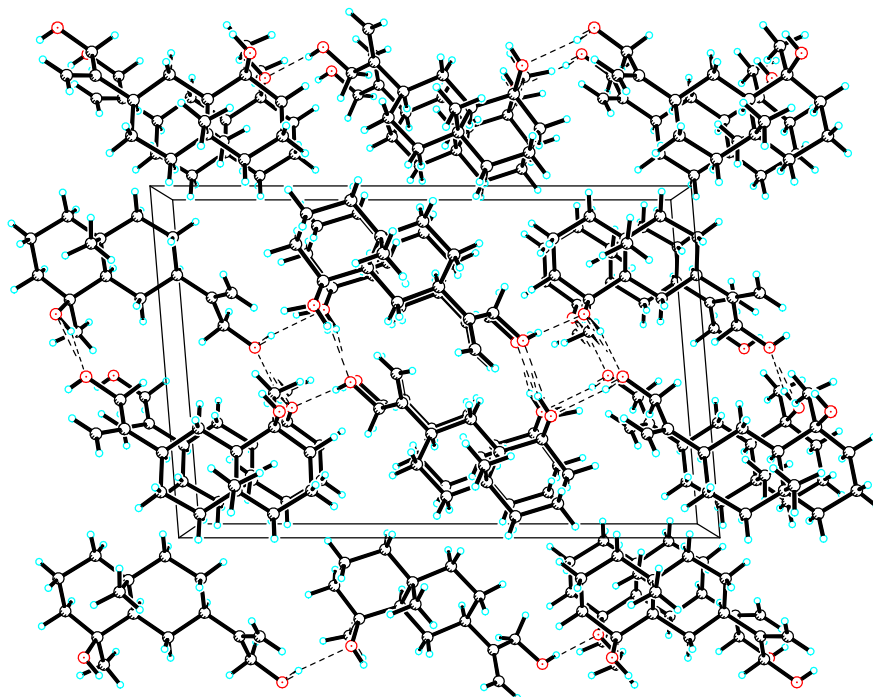

View of the pack drawing of xm7.

Hydrogen-bonds are shown as dashed lines.

Table 1. Crystal data and structure refinement for xm7\_0m.

|                        |                                                |                 |
|------------------------|------------------------------------------------|-----------------|
| Identification code    | global                                         |                 |
| Empirical formula      | C <sub>15</sub> H <sub>26</sub> O <sub>2</sub> |                 |
| Formula weight         | 238.36                                         |                 |
| Temperature            | 100(2) K                                       |                 |
| Wavelength             | 1.54178 Å                                      |                 |
| Crystal system         | Monoclinic                                     |                 |
| Space group            | P 1 21 1                                       |                 |
| Unit cell dimensions   | a = 12.1080(3) Å                               | = 90°.          |
|                        | b = 6.30390(10) Å                              | = 94.6690(10)°. |
|                        | c = 18.5396(4) Å                               | = 90°.          |
| Volume                 | 1410.39(5) Å <sup>3</sup>                      |                 |
| Z                      | 4                                              |                 |
| Density (calculated)   | 1.123 Mg/m <sup>3</sup>                        |                 |
| Absorption coefficient | 0.560 mm <sup>-1</sup>                         |                 |

|                                   |                                                             |
|-----------------------------------|-------------------------------------------------------------|
| F(000)                            | 528                                                         |
| Crystal size                      | 0.580 x 0.200 x 0.100 mm <sup>3</sup>                       |
| Theta range for data collection   | 2.39 to 72.47°.                                             |
| Index ranges                      | -14<= <i>h</i> <=14, -7<= <i>k</i> <=7, -22<= <i>l</i> <=22 |
| Reflections collected             | 30099                                                       |
| Independent reflections           | 5508 [R(int) = 0.0467]                                      |
| Completeness to theta = 72.47°    | 99.8 %                                                      |
| Absorption correction             | Semi-empirical from equivalents                             |
| Max. and min. transmission        | 0.95 and 0.76                                               |
| Refinement method                 | Full-matrix least-squares on F <sup>2</sup>                 |
| Data / restraints / parameters    | 5508 / 1 / 318                                              |
| Goodness-of-fit on F <sup>2</sup> | 1.078                                                       |
| Final R indices [I>2sigma(I)]     | R1 = 0.0312, wR2 = 0.0785                                   |
| R indices (all data)              | R1 = 0.0320, wR2 = 0.0792                                   |
| Absolute structure parameter      | 0.03(5)                                                     |
| Largest diff. peak and hole       | 0.192 and -0.280 e.Å <sup>-3</sup>                          |

**Figure S21.** X-ray crystallographic analysis for compound **2**

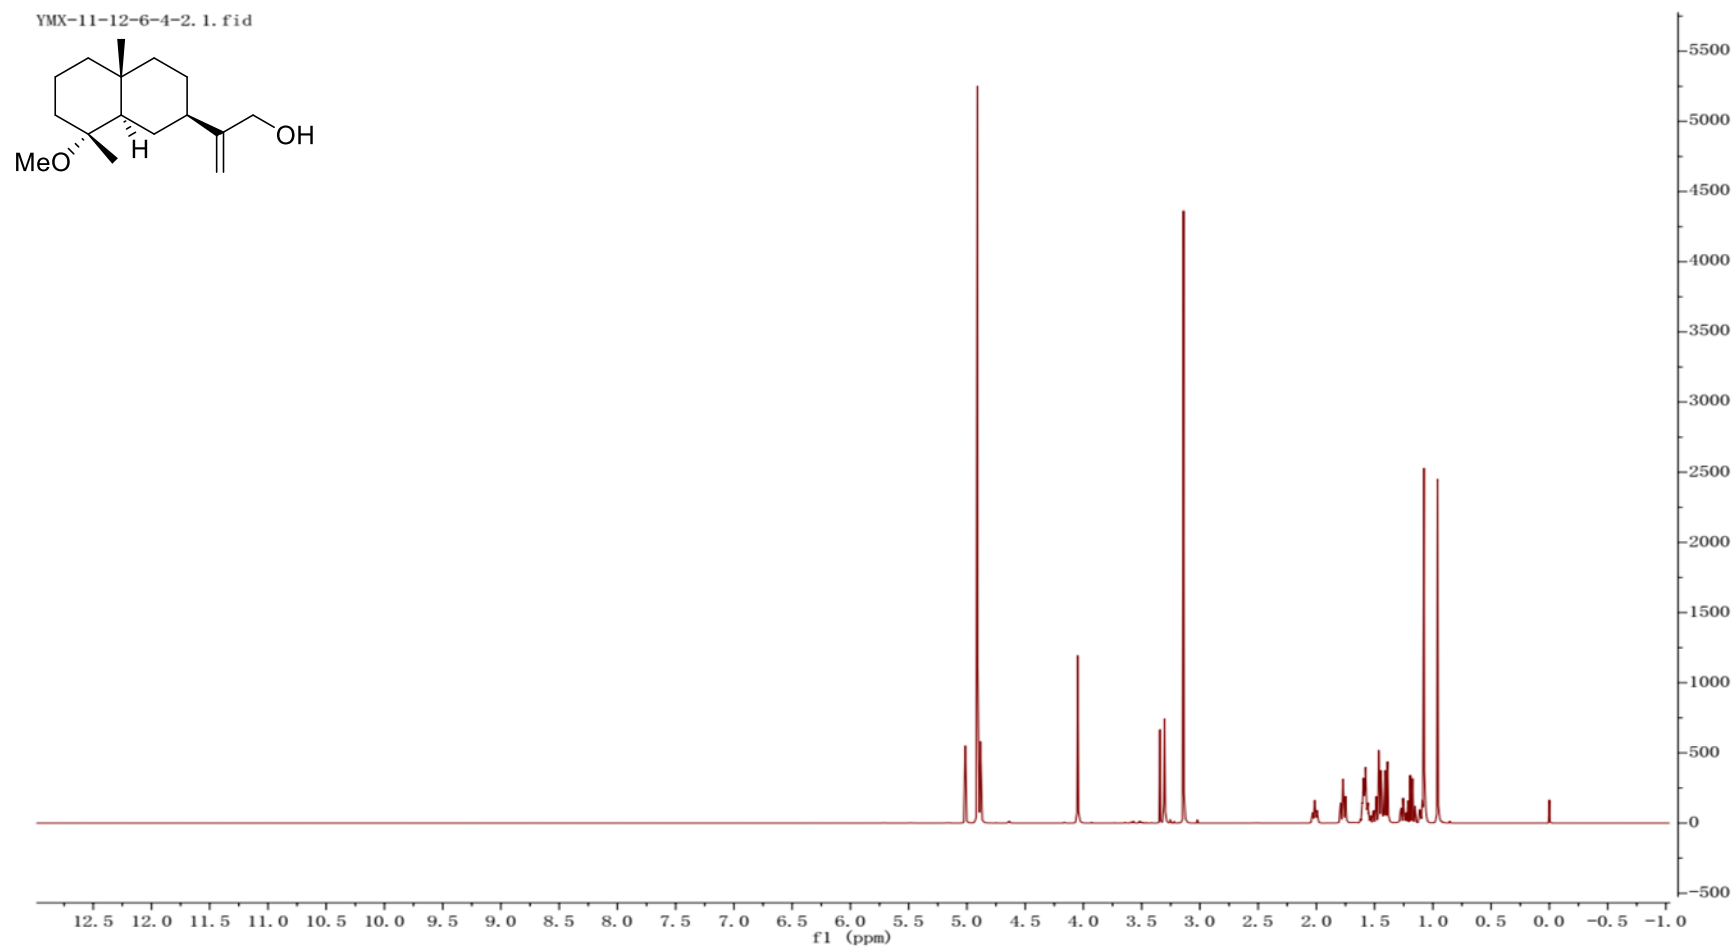

**Figure S22.**  $^1\text{H}$  NMR spectrum of compound **3** (CD<sub>3</sub>OD, 600 MHz)

YMX-11-12-6-4-2. 3. fid

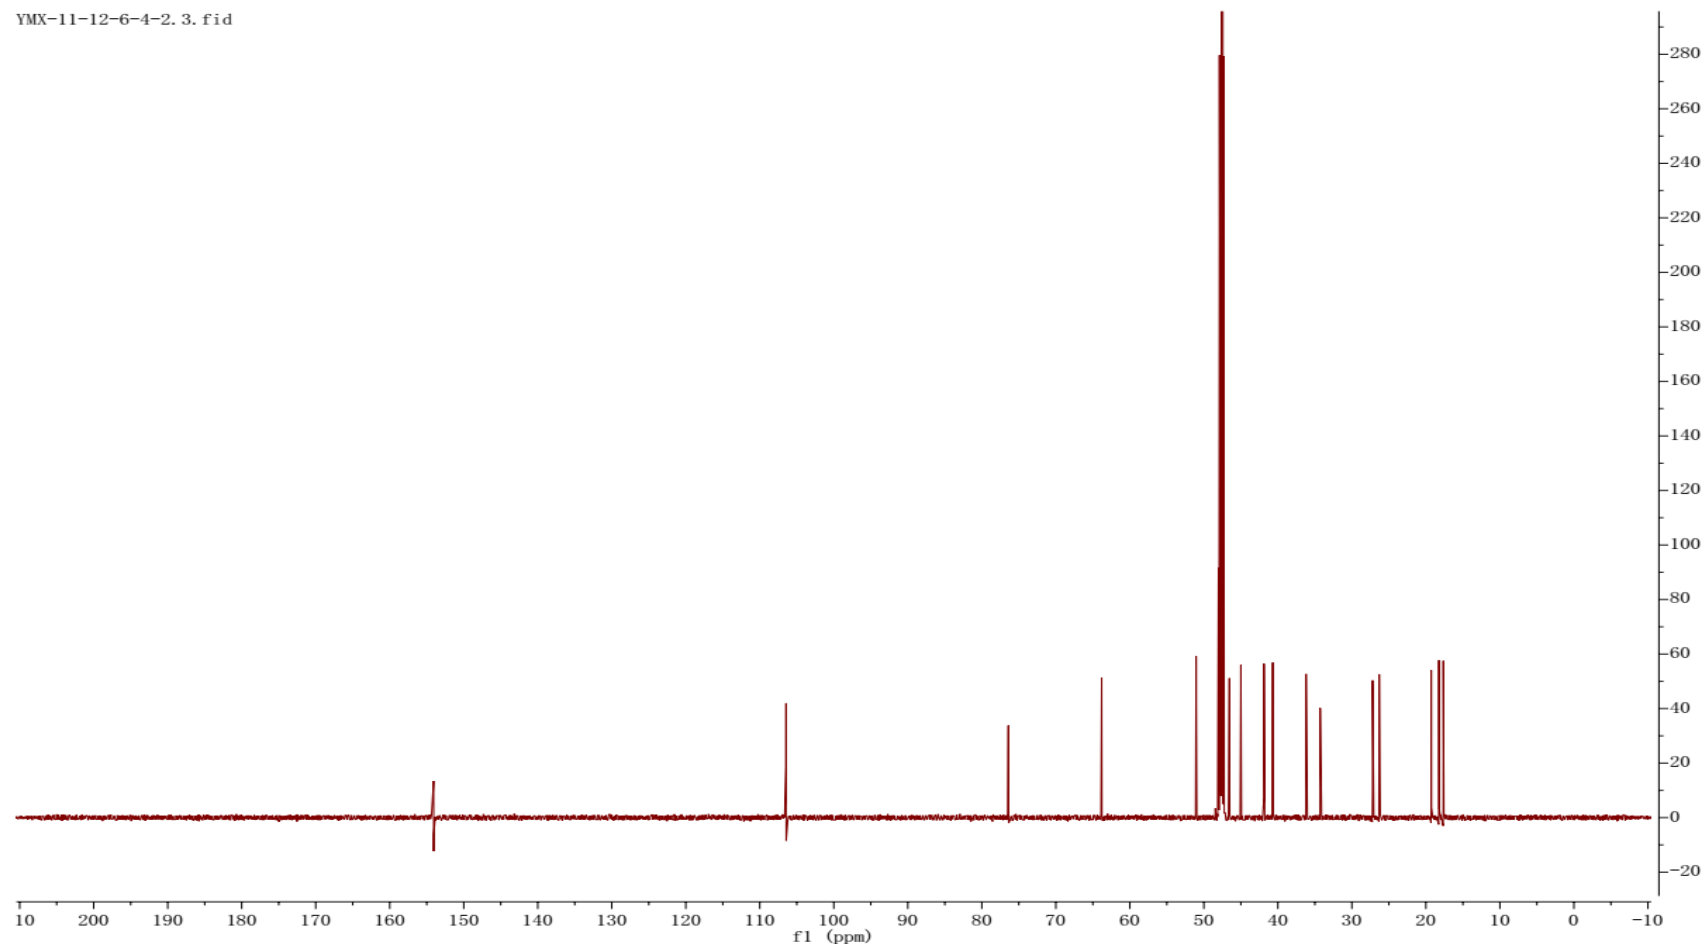

**Figure S23.**  $^{13}\text{C}$  NMR spectrum of compound **3** ( $\text{CD}_3\text{OD}$ , 150 MHz)

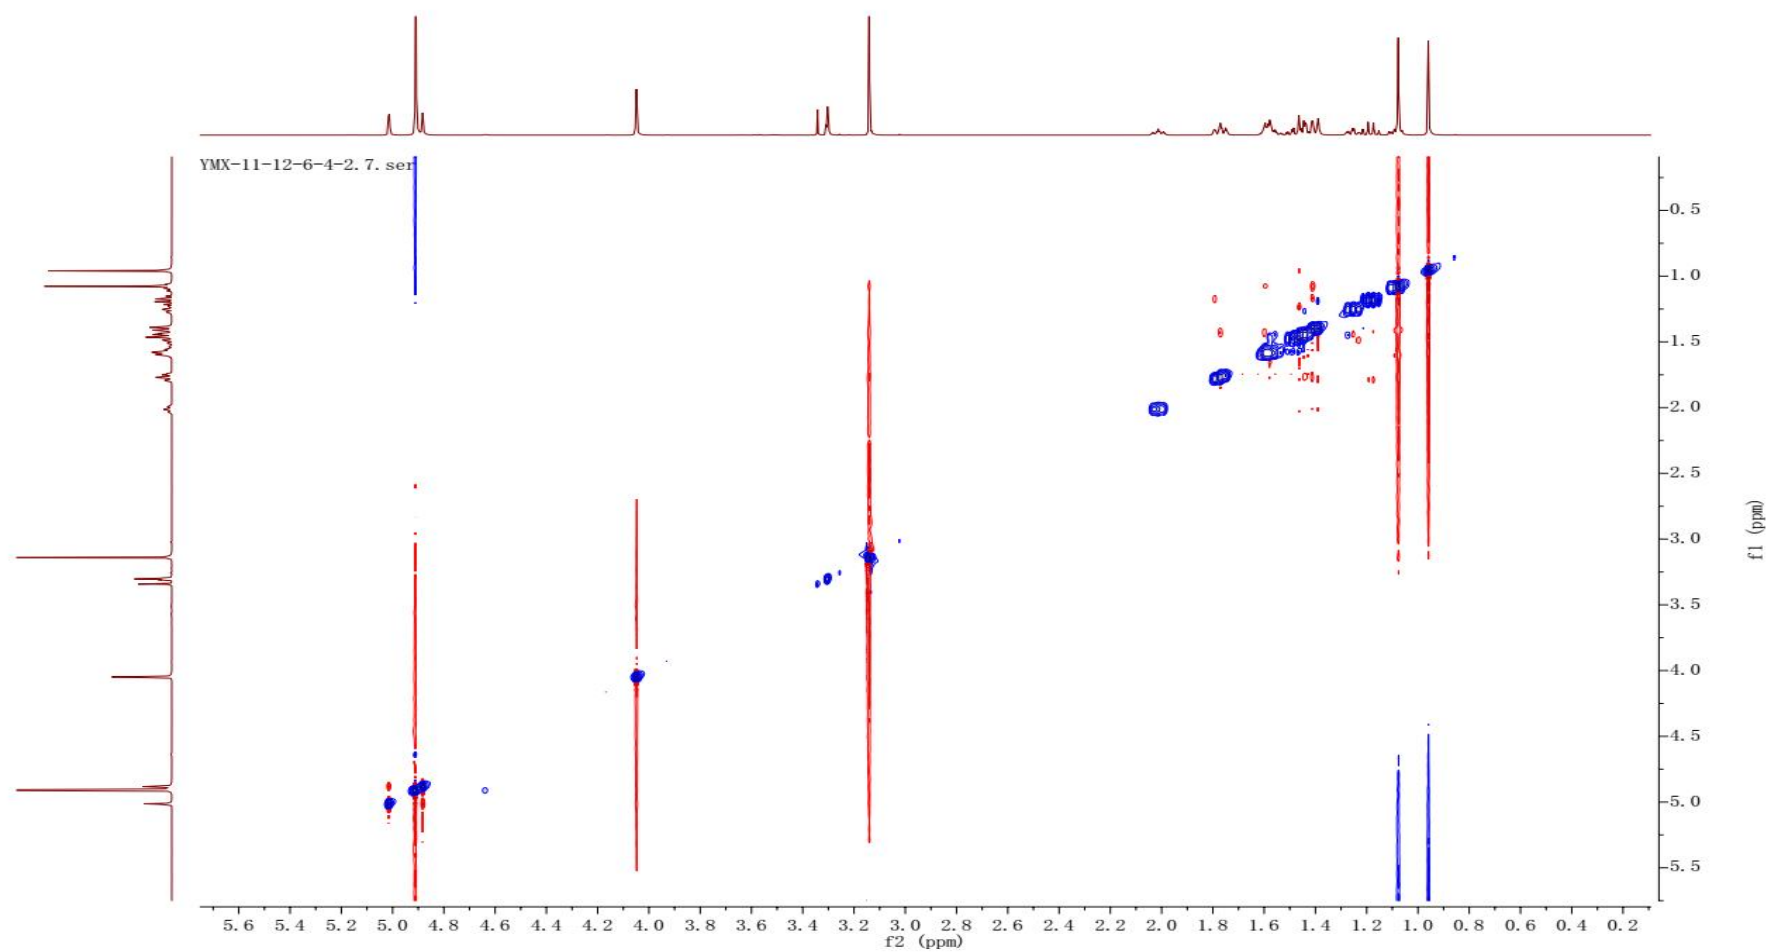

**Figure S24.** ROESY spectrum of compound **3** (CD<sub>3</sub>OD, 600 MHz)

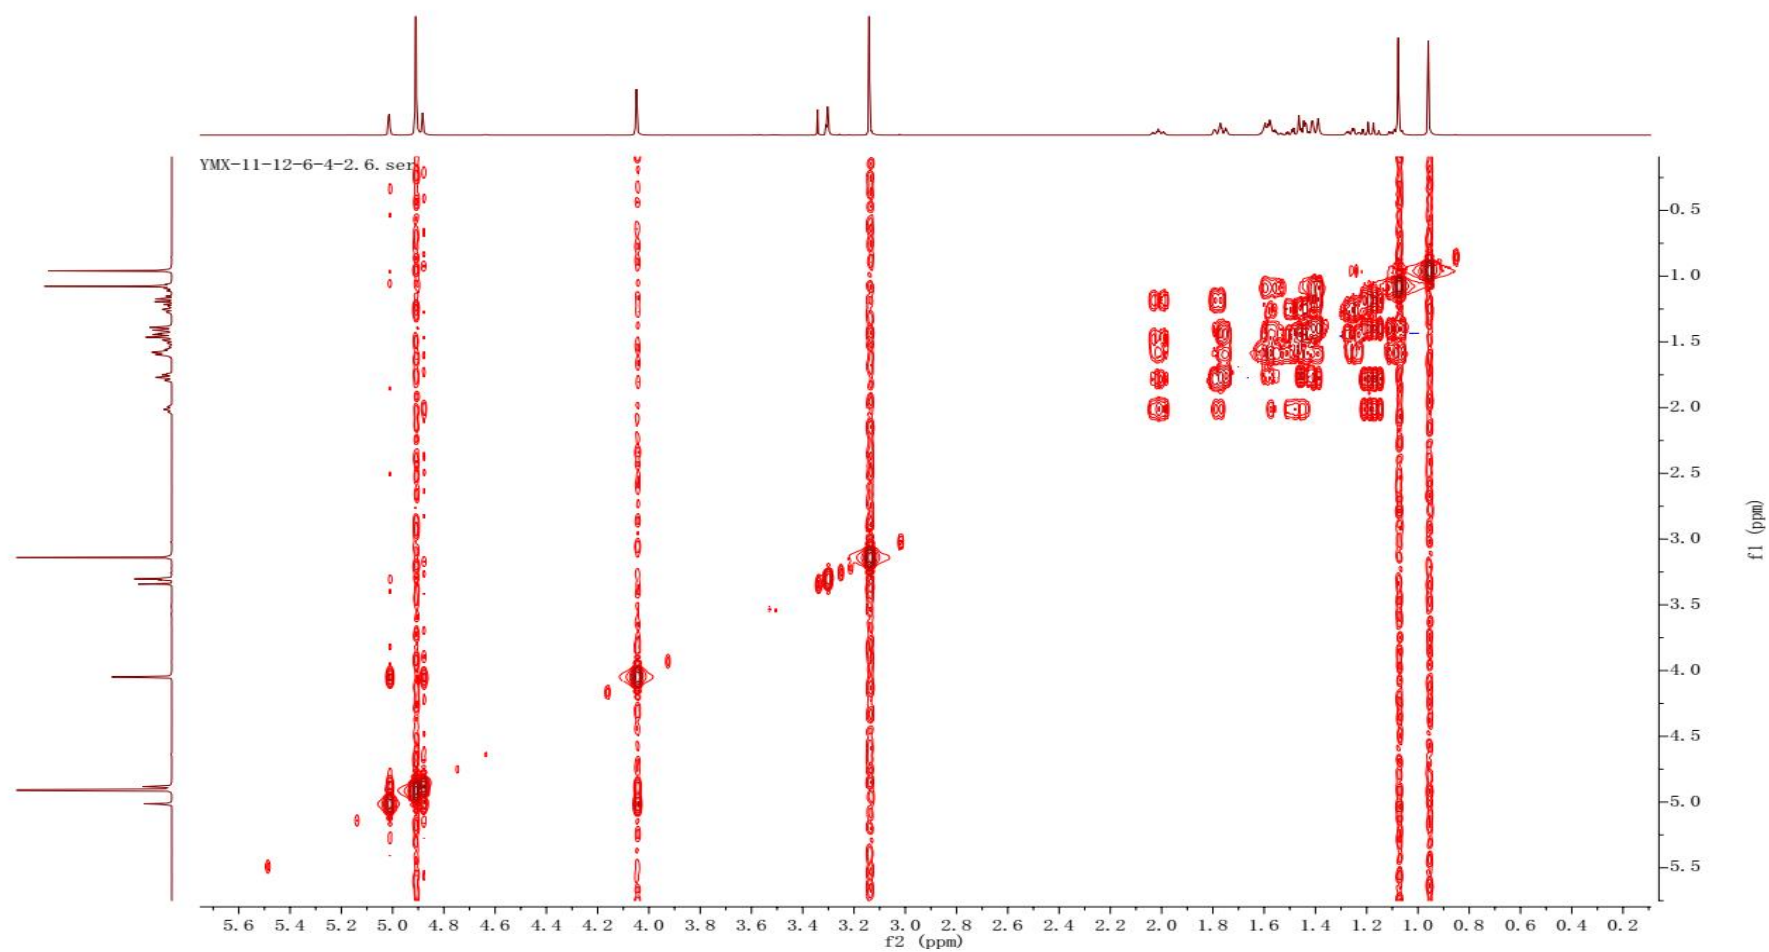

**Figure S25.**  $^1\text{H}$ - $^1\text{H}$  COSY spectrum of compound **3** ( $\text{CD}_3\text{OD}$ , 600 MHz)

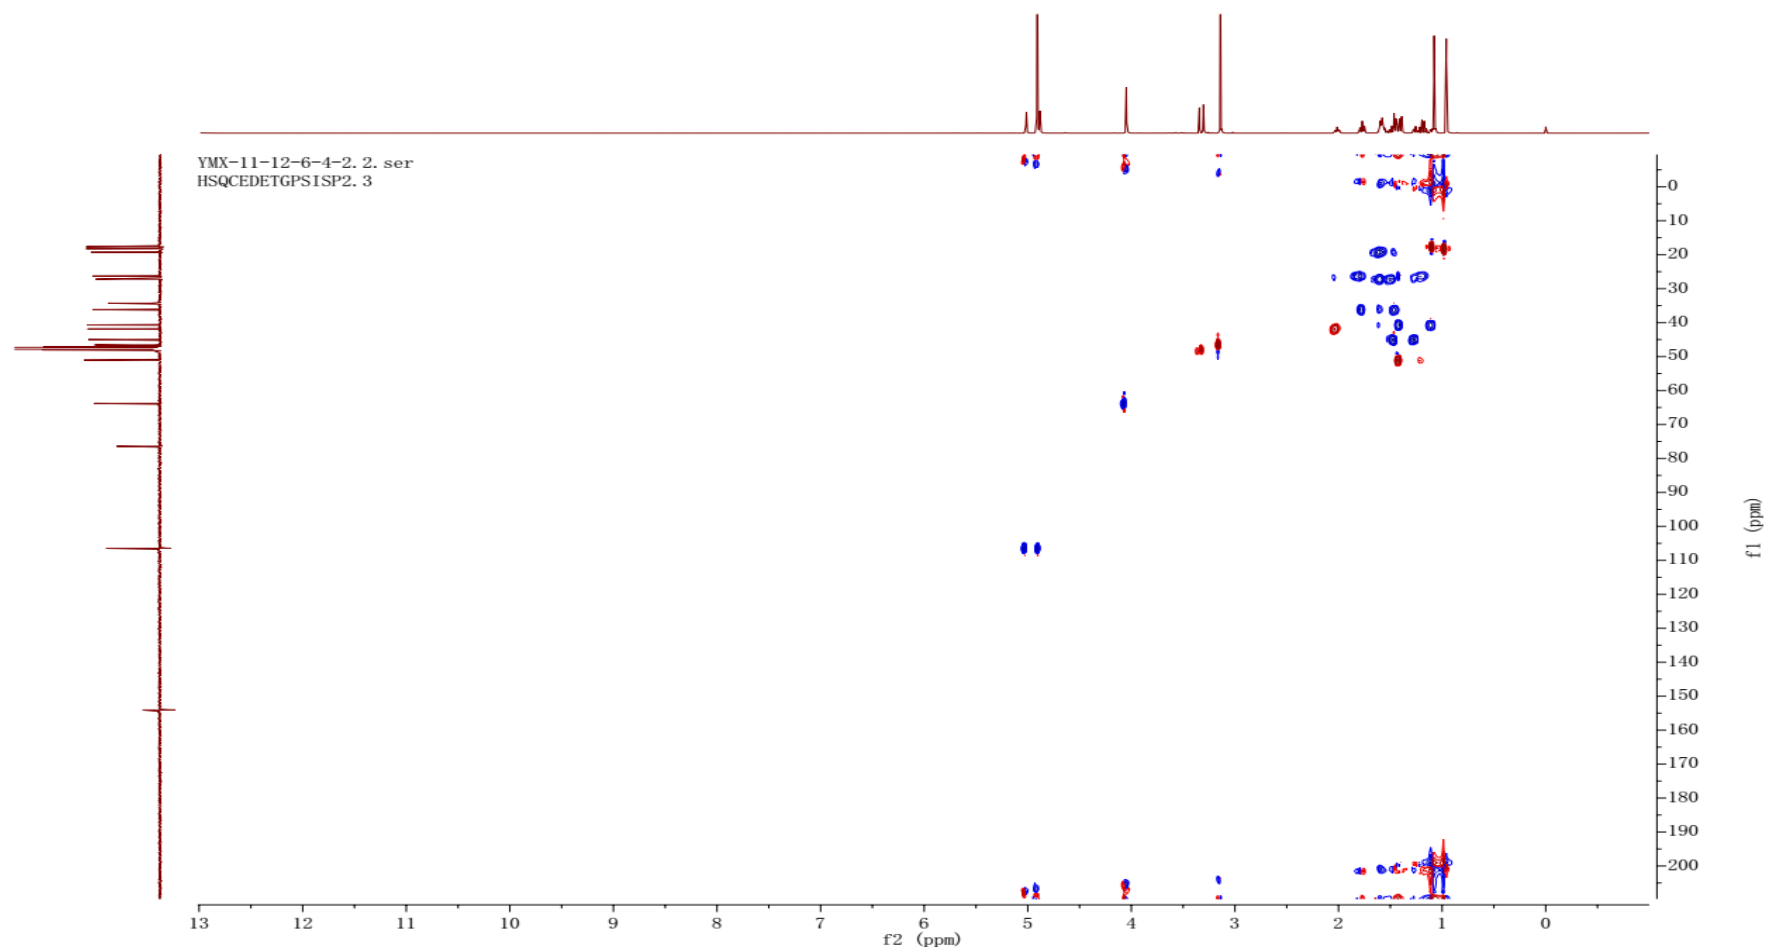

**Figure S26.** HSQC spectrum of compound **3** (CD<sub>3</sub>OD, 600 MHz)

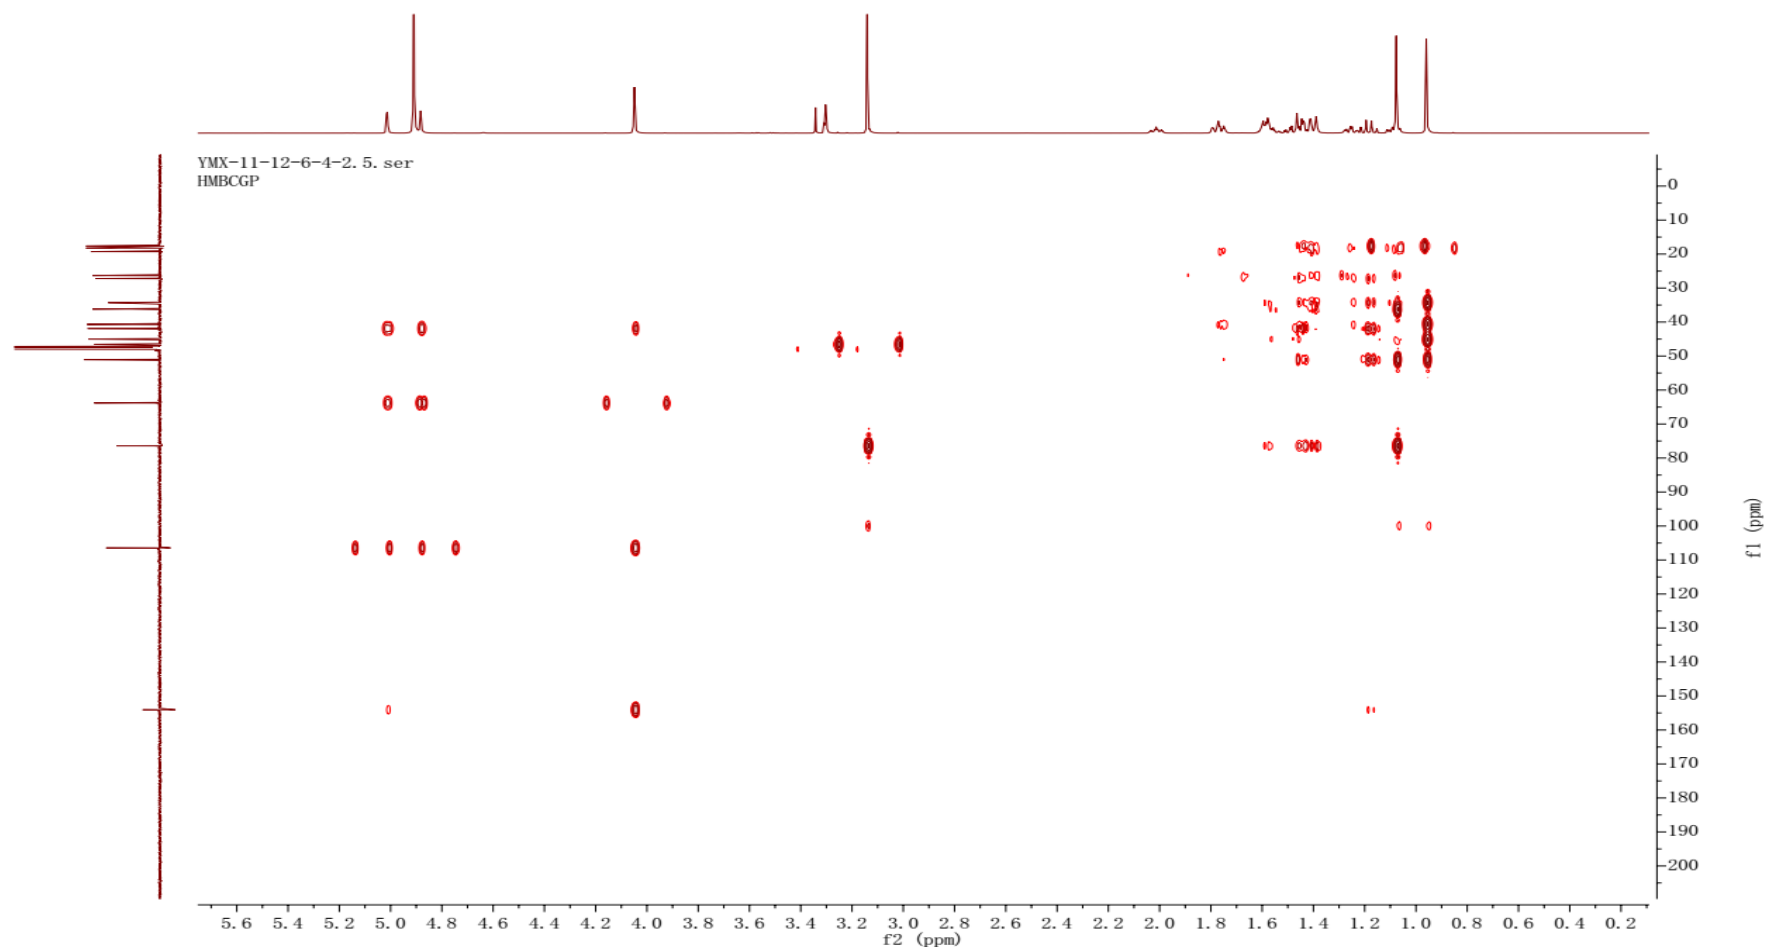

**Figure S27.** HMBC spectrum of compound **3** (CD<sub>3</sub>OD, 600 MHz)

## Qualitative Analysis Report

|                               |                             |                      |                      |
|-------------------------------|-----------------------------|----------------------|----------------------|
| <b>Data Filename</b>          | YMX-11-12-6-4-2.d           | <b>Sample Name</b>   | YMX-11-12-6-4-2      |
| <b>Sample Type</b>            | Sample                      | <b>Position</b>      | p1b6                 |
| <b>Instrument Name</b>        | Instrument 1                | <b>User Name</b>     | Q-TOF-HP\Q-TOF       |
| <b>Acq Method</b>             | default20190111-ms.m        | <b>Acquired Time</b> | 1/12/2020 3:53:15 PM |
| <b>IRM Calibration Status</b> | Success                     | <b>DA Method</b>     | 1.m                  |
| <b>Comment</b>                |                             |                      |                      |
| <b>Sample Group</b>           | <b>Info.</b>                |                      |                      |
| <b>Acquisition SW</b>         | 6200 series TOF/6500 series |                      |                      |
| <b>Version</b>                | Q-TOF B.05.01 (B5125.3)     |                      |                      |

### User Chromatograms

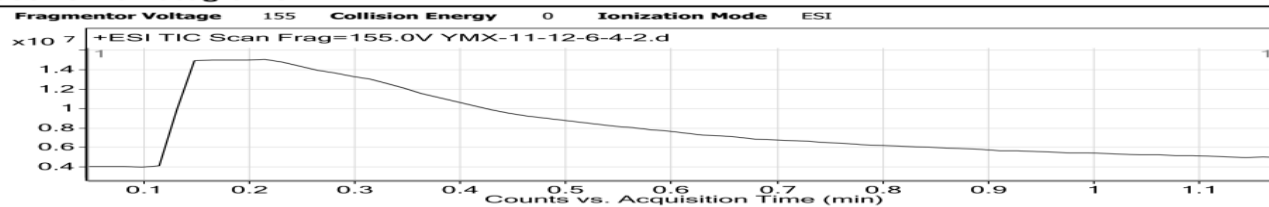

### User Spectra

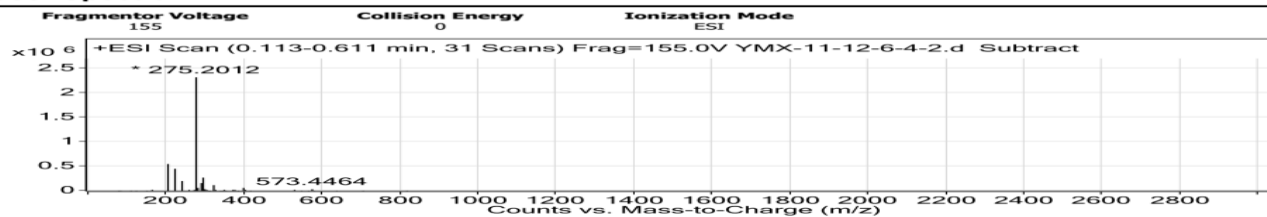

#### Peak List

| m/z      | z | Abund      |
|----------|---|------------|
| 203.1784 | 1 | 562934.5   |
| 221.1888 | 1 | 456599.94  |
| 238.2153 | 1 | 203270.44  |
| 275.2012 | 1 | 2326498.25 |
| 275.3404 | 1 | 322283.94  |
| 275.3859 | 1 | 111786.8   |
| 276.2007 | 1 | 1035205.25 |
| 289.1761 | 1 | 170995.88  |

Figure S28. HRESI spectrum of compound 3

YMX-11-12-6-4-2

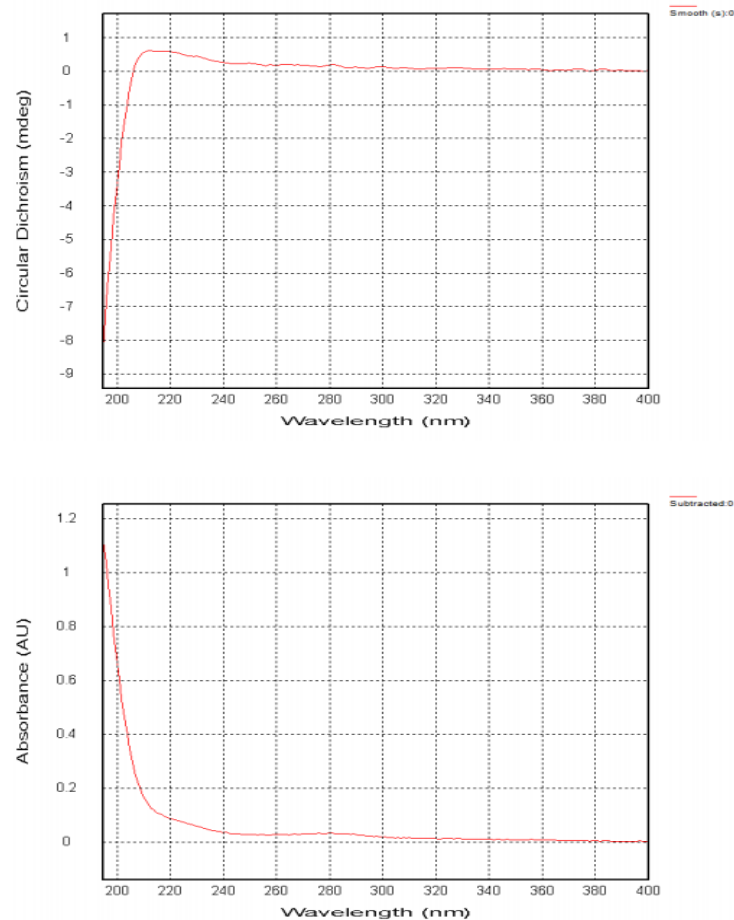

File: YMX-11-12-6-4-2 (195-400 nm) 20112716.dsx

ProBinaryX

Attributes :

- Time Stamp : Fri Nov 27 19:17:31 2020

- File ID : {D6821013-5B01-4cf8-96AB-CEAAAE56FBC2}

- Is CFR Compliant : false

- Original data has not been modified.

Remarks:

- User: CD

- Date: 2020/11/27

- Instrument: 0547

- DetectorType: LAAPD

- DichOS Calibration Correction Curve: 0547/2

- HV (CDDC channel): 0 v

- Time per point: 1 s

- Description: Sample 1

- Concentration: 0.2700mg/mL MeOH

- Pathlength: 1 mm

- Temperature: 20°C

Settings:

- Time-per-point: 1s (25us x 40000)

- SE

- Wavelength: 195nm - 400nm

- Step Size: 1nm

- Bandwidth: 1nm

**Figure S29.** CD and UV spectrum of compound **3**

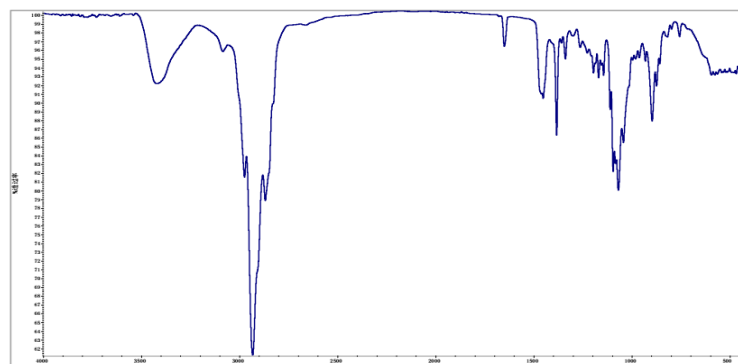

Sample Name: YMX-11-12-6-4-2  
KBr压片  
采集时间: 星期三 10月 28 15:29:57 2020 (GMT+08:00)  
仪器型号: NICOLET iS10  
Software version: OMNIC 9.8.372

样品扫描次数: 16  
背景扫描次数: 16  
分辨率: 4.000  
采样增益: 1.0  
扫描速度: 0.4747  
光阑: 80.00

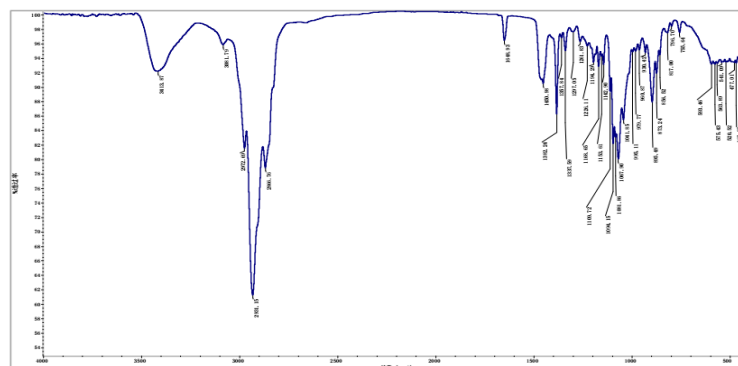

Sample Name: YMX-11-12-6-4-2  
KBr压片  
采集时间: 星期三 10月 28 15:29:57 2020 (GMT+08:00)  
仪器型号: NICOLET iS10  
Software version: OMNIC 9.8.372

样品扫描次数: 16  
背景扫描次数: 16  
分辨率: 4.000  
采样增益: 1.0  
扫描速度: 0.4747  
光阑: 80.00

星期三 10月 28 16:13:13 2020 (GMT+08:00)

标峰:

谱图: YMX-11-12-6-4-2  
范围: 4000.00 400.00  
(绝对) 阈值: 98.415  
灵敏度: 99

峰表:

|      |         |     |        |
|------|---------|-----|--------|
| 峰位置: | 428.22  | 强度: | 93.097 |
| 峰位置: | 437.88  | 强度: | 93.255 |
| 峰位置: | 467.07  | 强度: | 93.302 |
| 峰位置: | 477.01  | 强度: | 93.434 |
| 峰位置: | 513.07  | 强度: | 93.463 |
| 峰位置: | 520.52  | 强度: | 93.458 |
| 峰位置: | 541.09  | 强度: | 93.419 |
| 峰位置: | 563.89  | 强度: | 93.272 |
| 峰位置: | 575.43  | 强度: | 93.131 |
| 峰位置: | 593.46  | 强度: | 93.158 |
| 峰位置: | 755.64  | 强度: | 97.530 |
| 峰位置: | 796.70  | 强度: | 98.393 |
| 峰位置: | 817.00  | 强度: | 97.493 |
| 峰位置: | 856.52  | 强度: | 94.444 |
| 峰位置: | 873.24  | 强度: | 91.889 |
| 峰位置: | 895.49  | 强度: | 87.903 |
| 峰位置: | 930.42  | 强度: | 94.749 |
| 峰位置: | 960.87  | 强度: | 95.122 |
| 峰位置: | 979.77  | 强度: | 94.978 |
| 峰位置: | 995.11  | 强度: | 94.864 |
| 峰位置: | 1041.85 | 强度: | 85.458 |
| 峰位置: | 1067.90 | 强度: | 80.034 |
| 峰位置: | 1081.86 | 强度: | 83.002 |
| 峰位置: | 1094.15 | 强度: | 82.123 |
| 峰位置: | 1109.72 | 强度: | 89.205 |
| 峰位置: | 1142.90 | 强度: | 93.105 |
| 峰位置: | 1153.61 | 强度: | 94.253 |
| 峰位置: | 1168.65 | 强度: | 92.833 |
| 峰位置: | 1194.29 | 强度: | 93.392 |
| 峰位置: | 1226.11 | 强度: | 95.664 |
| 峰位置: | 1261.83 | 强度: | 96.304 |
| 峰位置: | 1297.05 | 强度: | 97.606 |
| 峰位置: | 1337.59 | 强度: | 94.985 |
| 峰位置: | 1357.84 | 强度: | 96.782 |
| 峰位置: | 1382.24 | 强度: | 86.283 |
| 峰位置: | 1450.98 | 强度: | 90.491 |
| 峰位置: | 1648.93 | 强度: | 96.434 |
| 峰位置: | 2866.76 | 强度: | 78.823 |
| 峰位置: | 2931.15 | 强度: | 61.206 |
| 峰位置: | 2972.69 | 强度: | 81.513 |
| 峰位置: | 3081.79 | 强度: | 95.841 |
| 峰位置: | 3413.87 | 强度: | 92.189 |

Figure S30. IR spectrum of compound 3

### **Rudolph Research Analytical**

This sample was measured on an Autopol VI, Serial #91058  
Manufactured by Rudolph Research Analytical, Hackettstown, NJ, USA.

Measurement Date : Monday, 23-NOV-2020

Set Temperature : OFF

Time Delay : Disabled

Delay between Measurement : Disabled

| <u>n</u>    | <u>Average</u>   | <u>Std.Dev.</u> | <u>% RSD</u>  | <u>Maximum</u> | <u>Minimum</u> |               |              |                     |              |  |
|-------------|------------------|-----------------|---------------|----------------|----------------|---------------|--------------|---------------------|--------------|--|
| 5           | -58.40           | 0.10            | -0.17         | -58.33         | -58.53         |               |              |                     |              |  |
| <u>S.No</u> | <u>Sample ID</u> | <u>Time</u>     | <u>Result</u> | <u>Scale</u>   | <u>OR °Arc</u> | <u>WLG.nm</u> | <u>Lg.mm</u> | <u>Conc.g/100ml</u> | <u>Temp.</u> |  |
| 1           | YMX-11-12-6-4-2  | 09:21:22 PM     | -58.53        | SR             | -0.0878        | 589           | 100.00       | 0.150               | 22.2         |  |
| 2           | YMX-11-12-6-4-2  | 09:21:30 PM     | -58.33        | SR             | -0.0875        | 589           | 100.00       | 0.150               | 22.3         |  |
| 3           | YMX-11-12-6-4-2  | 09:21:38 PM     | -58.33        | SR             | -0.0875        | 589           | 100.00       | 0.150               | 22.3         |  |
| 4           | YMX-11-12-6-4-2  | 09:21:46 PM     | -58.33        | SR             | -0.0875        | 589           | 100.00       | 0.150               | 22.3         |  |
| 5           | YMX-11-12-6-4-2  | 09:21:54 PM     | -58.47        | SR             | -0.0877        | 589           | 100.00       | 0.150               | 22.3         |  |

**Figure S31.**  $[\alpha]^{25}_D$  of compound **3**

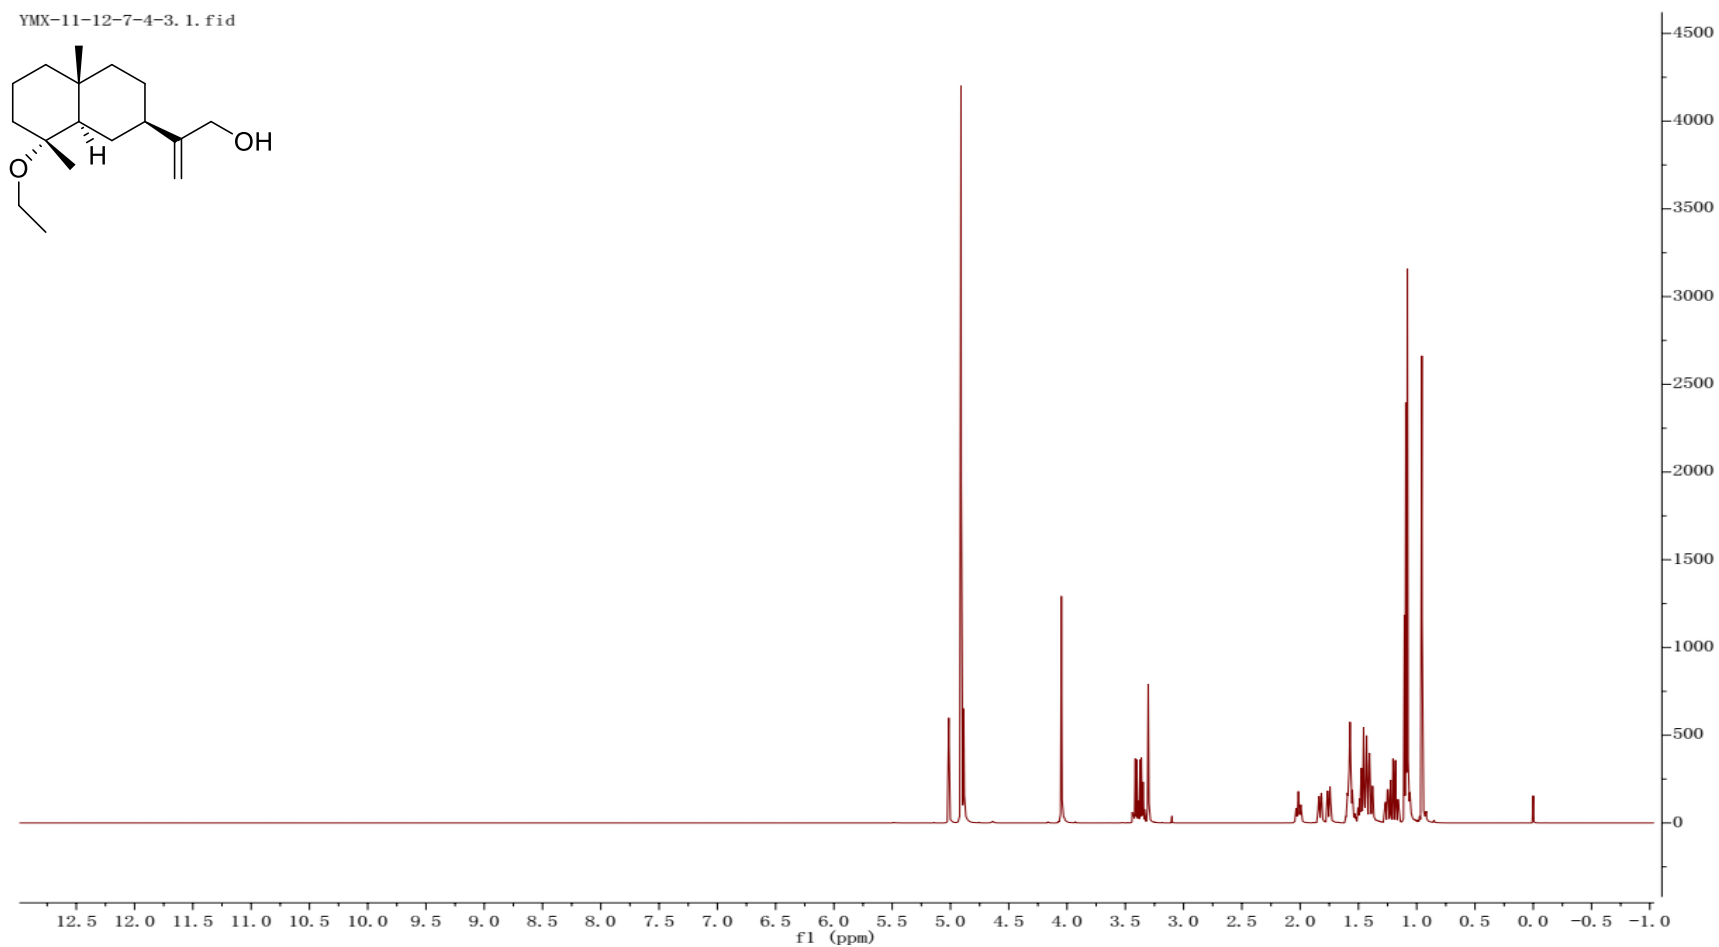

**Figure S32.** <sup>1</sup>H NMR spectrum of compound **4** (CD<sub>3</sub>OD, 600 MHz)

YMX-11-12-7-4-3. 3. fid

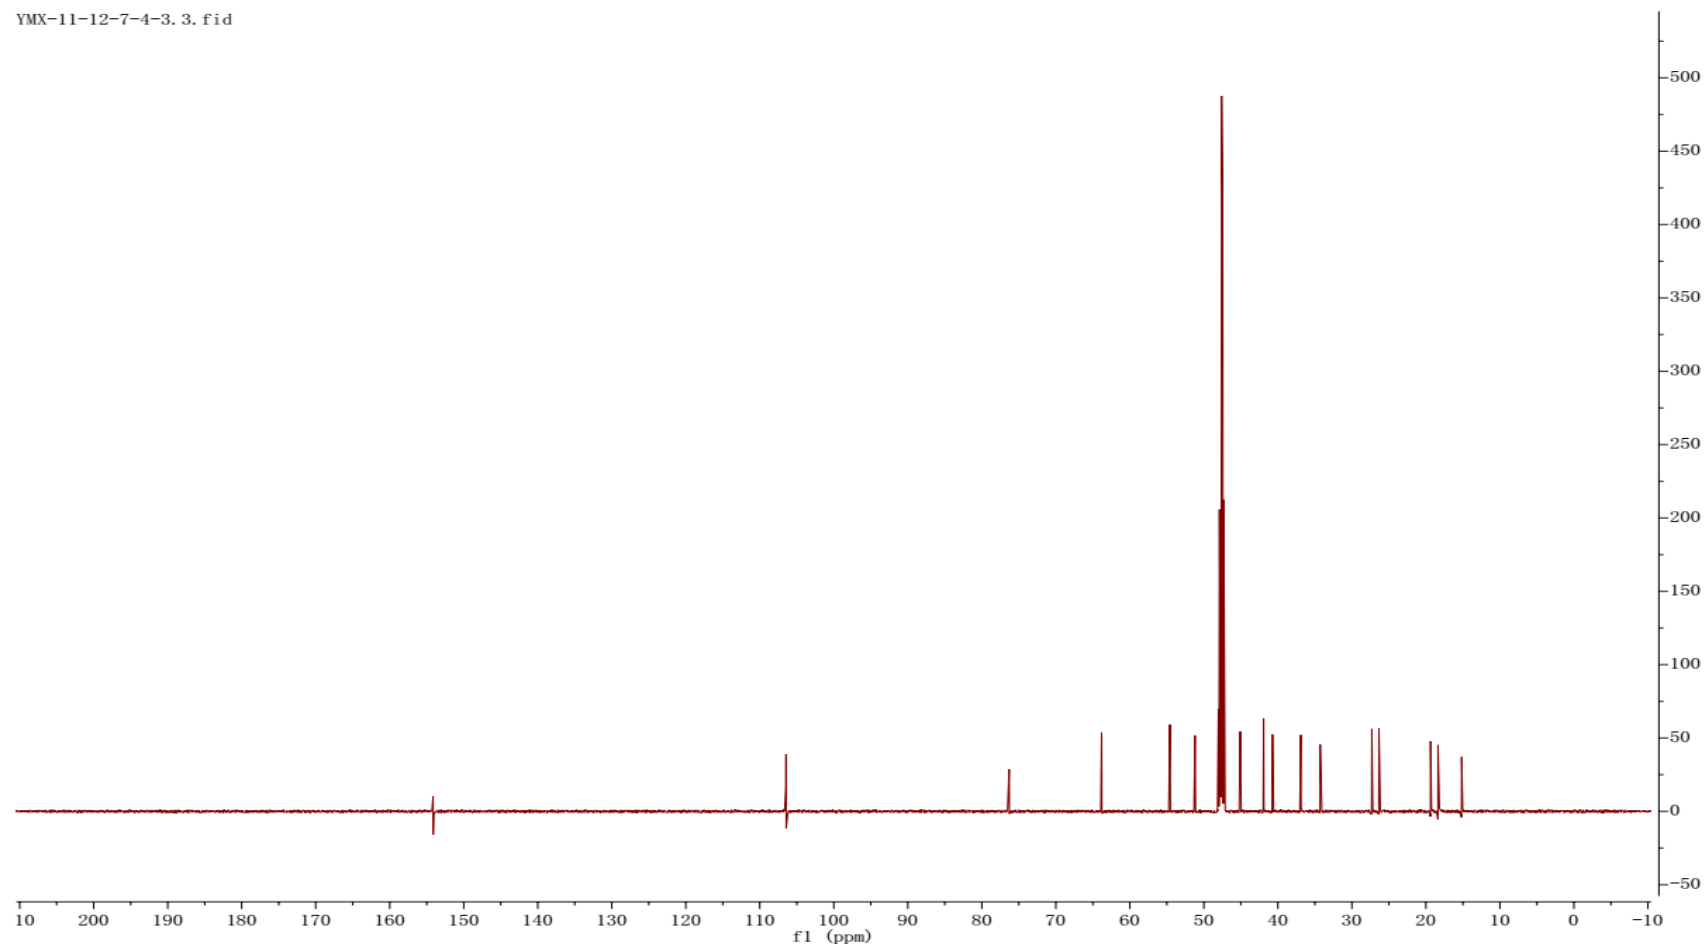

**Figure S33.**  $^{13}\text{C}$  NMR spectrum of compound **4** ( $\text{CD}_3\text{OD}$ , 150 MHz)

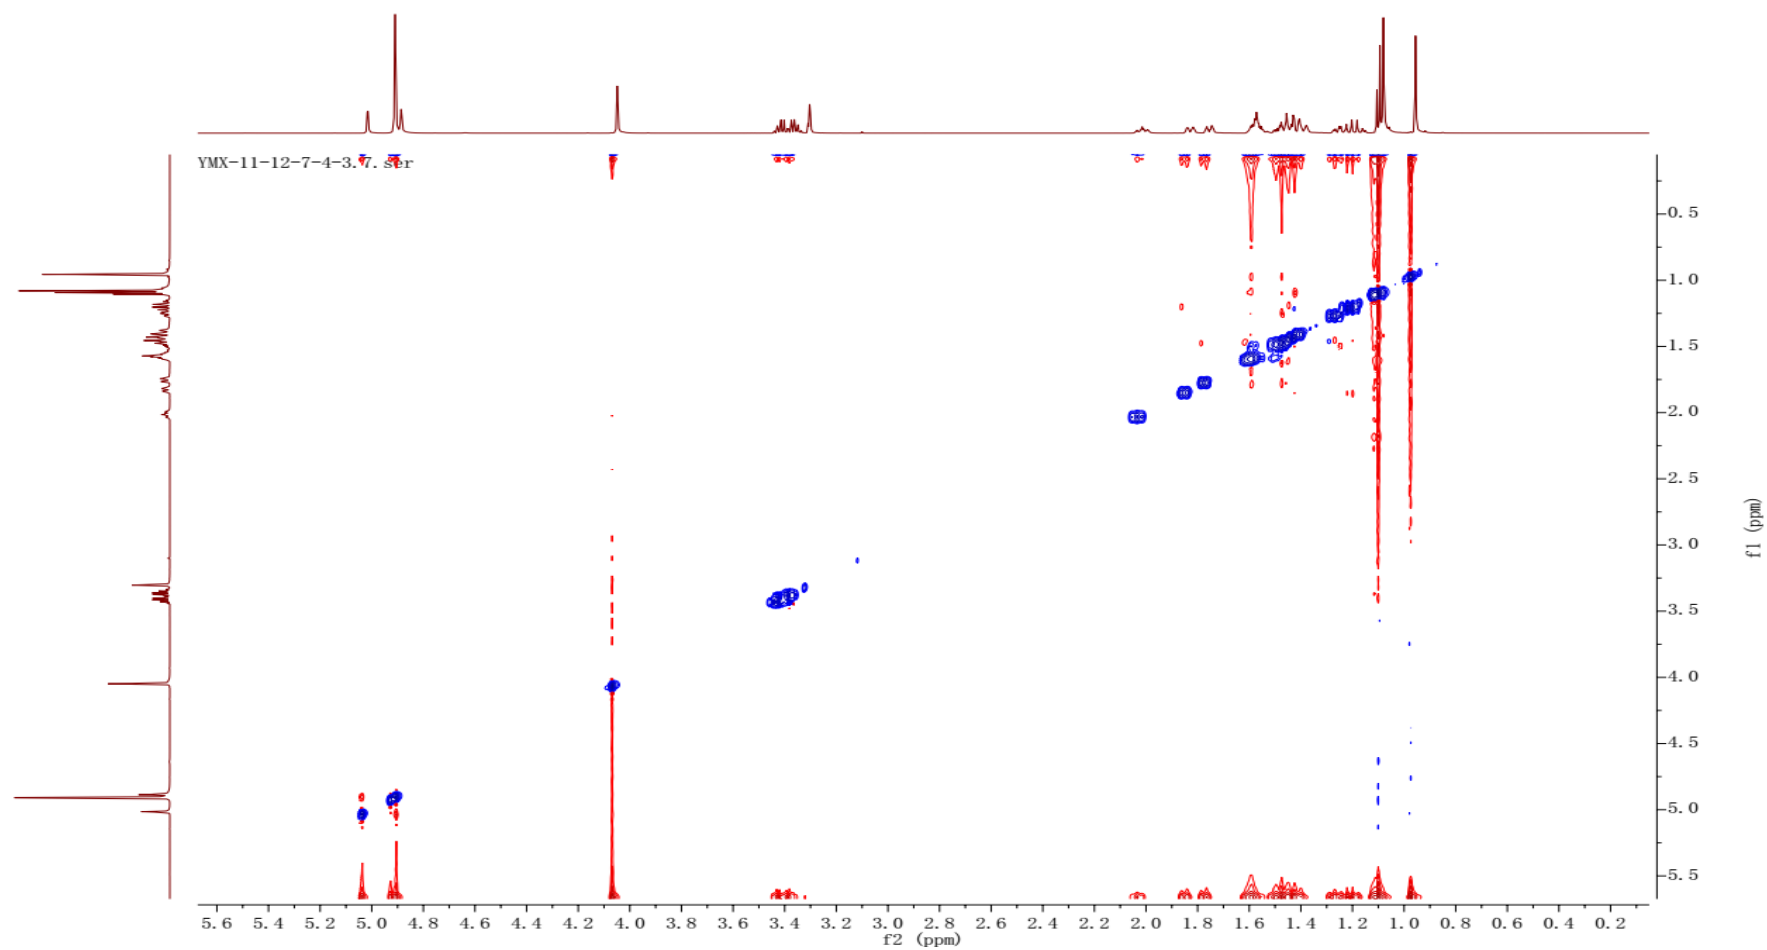

**Figure S34.** ROESY spectrum of compound **4** (CD<sub>3</sub>OD, 600 MHz)

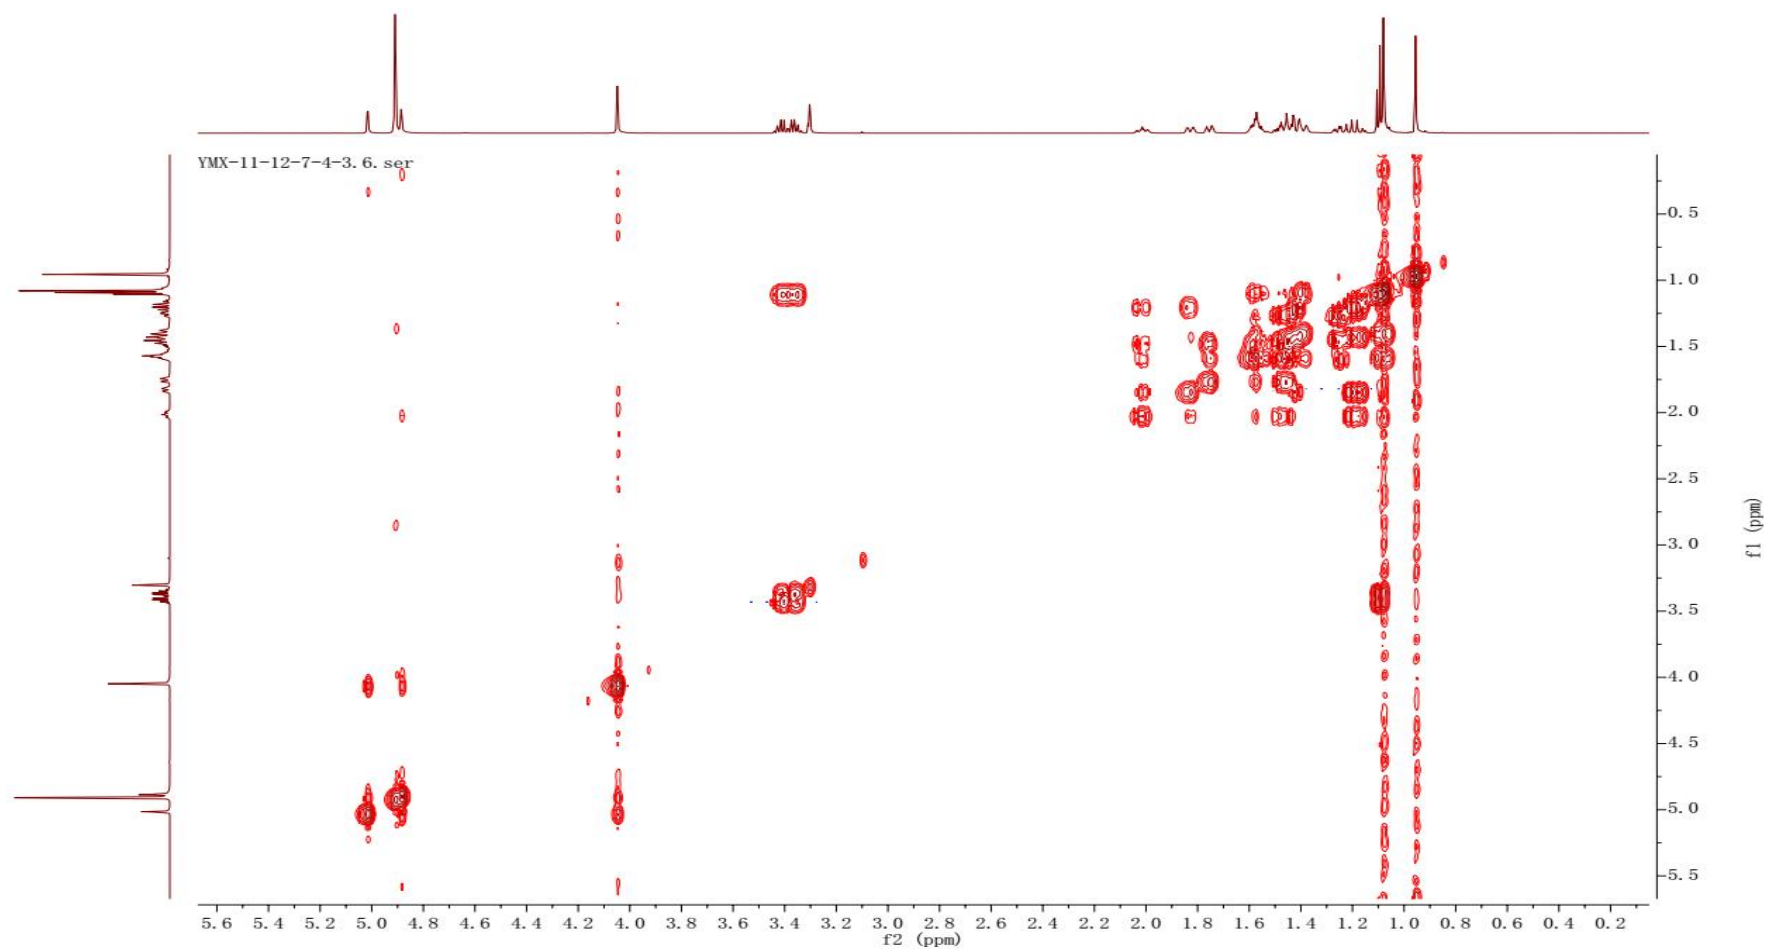

**Figure S35.**  $^1\text{H}$ - $^1\text{H}$  COSY spectrum of compound **4** ( $\text{CD}_3\text{OD}$ , 600 MHz)

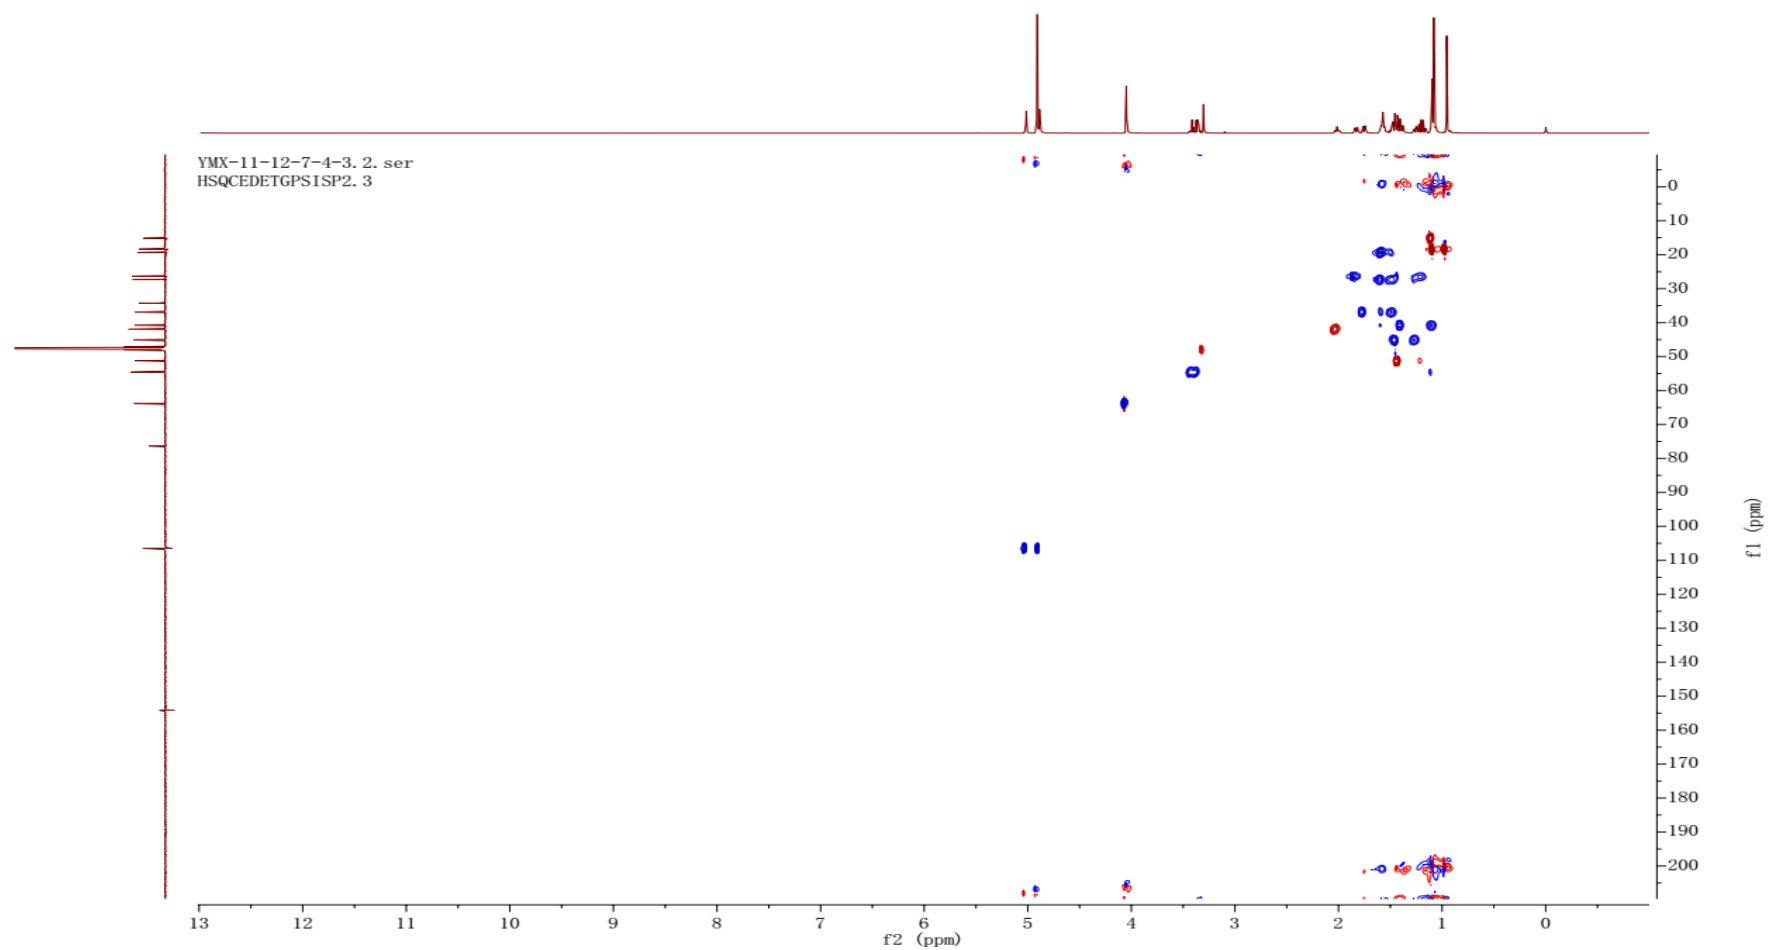

**Figure S36.** HSQC spectrum of compound **4** (CD<sub>3</sub>OD, 600 MHz)

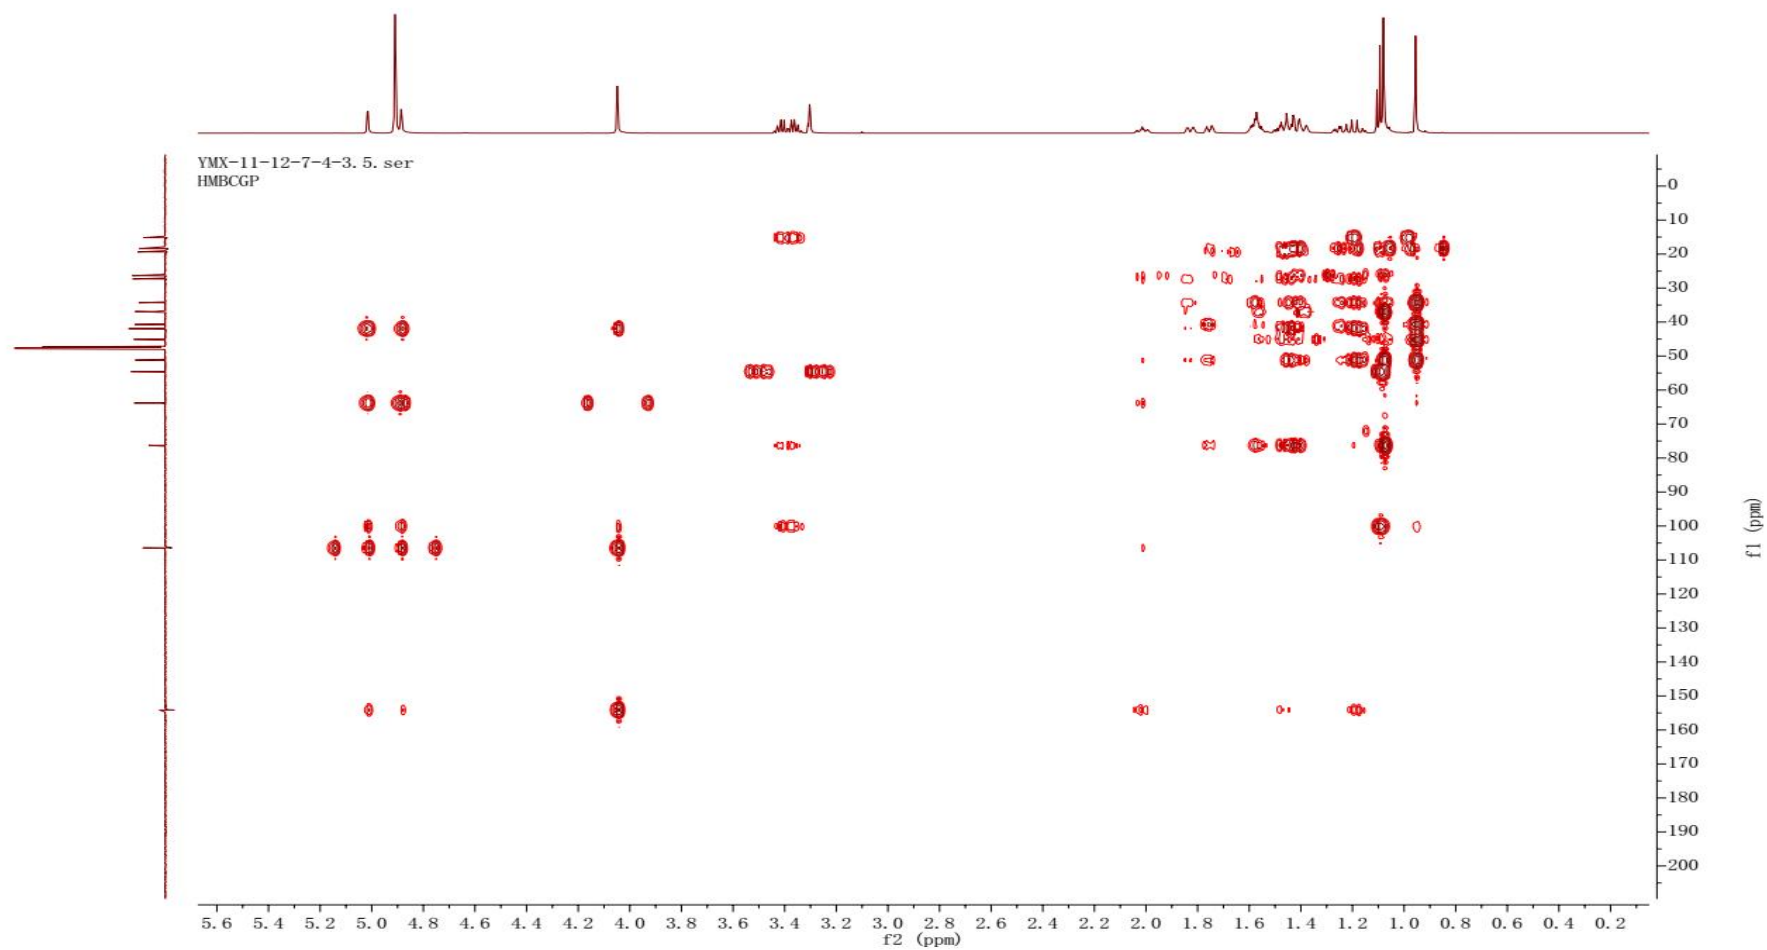

**Figure S37.** HMBC spectrum of compound **4** (CD<sub>3</sub>OD, 600 MHz)

## Qualitative Analysis Report

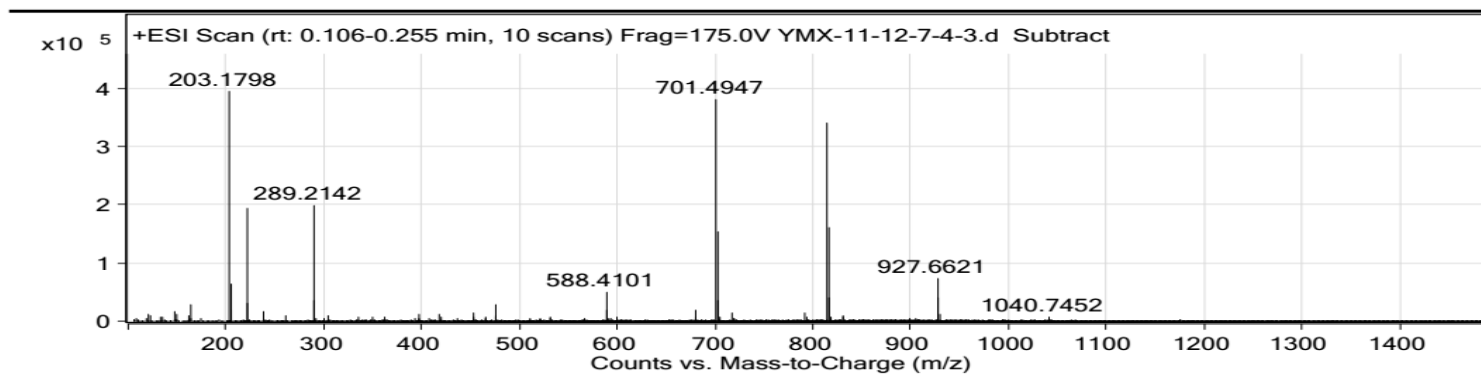

### Peak List

| m/z      | z | Abund     |
|----------|---|-----------|
| 163.1479 | 1 | 29645.47  |
| 203.1798 | 1 | 395609.72 |
| 204.1828 | 1 | 62958.54  |
| 205.1934 | 1 | 17911.16  |
| 221.1902 | 1 | 195222.67 |
| 222.1935 | 1 | 30062.8   |
| 289.2142 | 1 | 198920.55 |
| 290.2176 | 1 | 35569.34  |
| 475.3259 | 2 | 29273.89  |
| 588.4101 | 1 | 50941.28  |
| 589.413  | 1 | 17897.13  |
| 679.5111 | 1 | 18046.72  |
| 701.4947 | 1 | 380123.91 |
| 702.4978 | 1 | 153495.44 |
| 703.5    | 1 | 35624.95  |
| 814.5788 | 1 | 339993.13 |
| 815.5817 | 1 | 162160.91 |
| 816.5844 | 1 | 41294.73  |
| 927.6621 | 1 | 72421.57  |
| 928.6646 | 1 | 40550.8   |

Figure S38. HRESI spectrum of compound 4

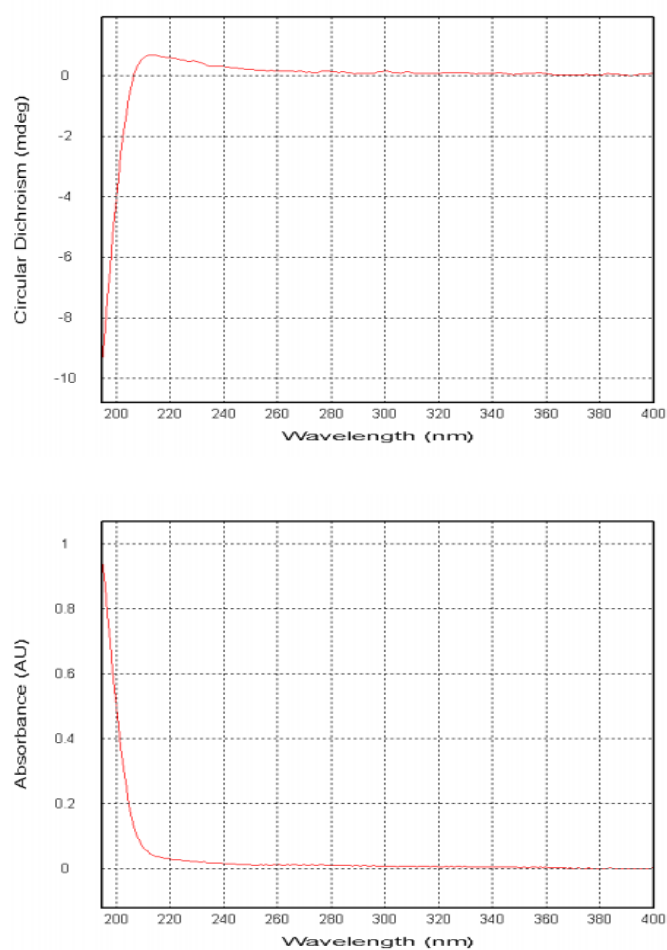

File: YMX-11-12-7-4-3 (195-400 nm) 20112719.dsx

ProBinaryX

Attributes :

- Time Stamp : Fri Nov 27 20:15:48 2020

- File ID : {E8796B06-0EF0-4e14-9505-25E7F76C5594}

- Is CFR Compliant : false

- Original data has not been modified.

Remarks:

- User: CD

- Date: 2020/11/27

- Instrument: 0547

- DetectorType: LAAPD

- DichOS Calibration Correction Curve: 0547/2

- HV (CDDC channel): 0 v

- Time per point: 1 s

- Description: Sample 1

- Concentration: 0.6500mg/mL MeOH

- Pathlength: 1 mm

- Temperature: 20°C

Settings:

- Time-per-point: 1s (25us x 40000)

- SE

- Wavelength: 195nm - 400nm

- Step Size: 1nm

- Bandwidth: 1nm

**Figure S39.** CD and UV spectrum of compound 4

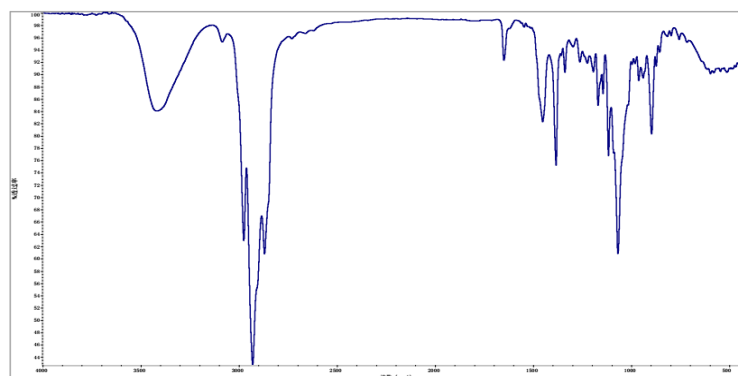

Sample Name: YMX-11-12-7-4-3  
KBr压片  
采集时间: 星期四 10月 29 10:22:16 2020 (GMT+08:00)  
仪器型号: NICOLET iS10  
Software version: OMNIC 9.8.372

样品扫描次数: 16  
背景扫描次数: 16  
分辨率: 4.000  
采样增益: 1.0  
扫描速度: 0.4747  
光阑: 80.00

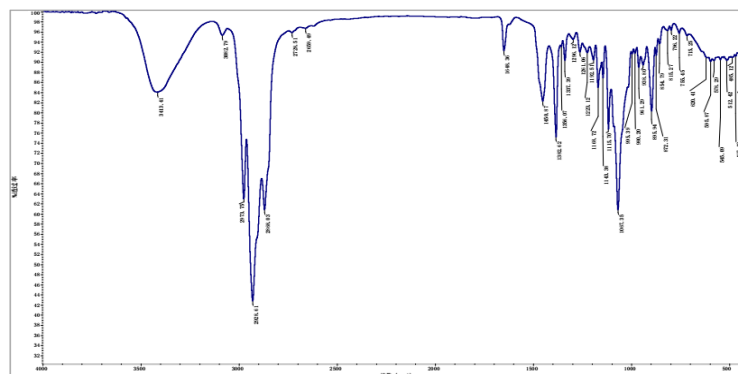

Sample Name: YMX-11-12-7-4-3  
KBr压片  
采集时间: 星期四 10月 29 10:22:16 2020 (GMT+08:00)  
仪器型号: NICOLET iS10  
Software version: OMNIC 9.8.372

样品扫描次数: 16  
背景扫描次数: 16  
分辨率: 4.000  
采样增益: 1.0  
扫描速度: 0.4747  
光阑: 80.00

星期四 10月 29 10:52:47 2020 (GMT+08:00)

标峰:

谱图: YMX-11-12-7-4-3  
范围: 4000.00 400.00  
(绝对) 阈值: 97.382  
灵敏度: 99

峰表:

|      |         |     |        |
|------|---------|-----|--------|
| 峰位置: | 411.53  | 强度: | 92.625 |
| 峰位置: | 432.24  | 强度: | 91.099 |
| 峰位置: | 453.24  | 强度: | 91.639 |
| 峰位置: | 467.43  | 强度: | 91.155 |
| 峰位置: | 485.12  | 强度: | 90.882 |
| 峰位置: | 512.42  | 强度: | 90.304 |
| 峰位置: | 545.09  | 强度: | 90.458 |
| 峰位置: | 578.29  | 强度: | 90.285 |
| 峰位置: | 595.87  | 强度: | 90.092 |
| 峰位置: | 715.25  | 强度: | 95.228 |
| 峰位置: | 755.45  | 强度: | 95.663 |
| 峰位置: | 796.22  | 强度: | 96.297 |
| 峰位置: | 815.27  | 强度: | 96.160 |
| 峰位置: | 854.79  | 强度: | 93.601 |
| 峰位置: | 872.31  | 强度: | 91.325 |
| 峰位置: | 895.94  | 强度: | 80.277 |
| 峰位置: | 938.80  | 强度: | 89.396 |
| 峰位置: | 961.29  | 强度: | 88.930 |
| 峰位置: | 980.20  | 强度: | 91.718 |
| 峰位置: | 995.39  | 强度: | 91.590 |
| 峰位置: | 1067.35 | 强度: | 60.756 |
| 峰位置: | 1115.70 | 强度: | 76.698 |
| 峰位置: | 1143.38 | 强度: | 86.808 |
| 峰位置: | 1168.72 | 强度: | 84.945 |
| 峰位置: | 1192.51 | 强度: | 90.372 |
| 峰位置: | 1223.12 | 强度: | 91.797 |
| 峰位置: | 1261.06 | 强度: | 91.989 |
| 峰位置: | 1296.12 | 强度: | 94.483 |
| 峰位置: | 1337.39 | 强度: | 90.320 |
| 峰位置: | 1356.07 | 强度: | 93.043 |
| 峰位置: | 1382.62 | 强度: | 75.159 |
| 峰位置: | 1450.87 | 强度: | 82.245 |
| 峰位置: | 1648.36 | 强度: | 92.241 |
| 峰位置: | 2659.49 | 强度: | 96.667 |
| 峰位置: | 2728.51 | 强度: | 95.803 |
| 峰位置: | 2868.03 | 强度: | 60.744 |
| 峰位置: | 2928.61 | 强度: | 42.689 |
| 峰位置: | 2973.75 | 强度: | 62.895 |
| 峰位置: | 3082.79 | 强度: | 95.265 |
| 峰位置: | 3413.41 | 强度: | 84.019 |

Figure S40. IR spectrum of compound 4

### **Rudolph Research Analytical**

This sample was measured on an Autopol VI, Serial #91058  
Manufactured by Rudolph Research Analytical, Hackettstown, NJ, USA.

Measurement Date : Thursday, 26-NOV-2020

Set Temperature : OFF

Time Delay : Disabled

Delay between Measurement : Disabled

| <u>n</u>    | <u>Average</u>   | <u>Std.Dev.</u> | <u>% RSD</u>  | <u>Maximum</u> | <u>Minimum</u> |               |              |                     |              |  |
|-------------|------------------|-----------------|---------------|----------------|----------------|---------------|--------------|---------------------|--------------|--|
| 5           | -24.66           | 0.07            | -0.28         | -24.56         | -24.72         |               |              |                     |              |  |
| <u>S.No</u> | <u>Sample ID</u> | <u>Time</u>     | <u>Result</u> | <u>Scale</u>   | <u>OR °Arc</u> | <u>WLG.nm</u> | <u>Lg.mm</u> | <u>Conc.g/100ml</u> | <u>Temp.</u> |  |
| 1           | YMX-11-12-7-4-3  | 02:54:20 PM     | -24.72        | SR             | -0.0618        | 589           | 100.00       | 0.250               | 22.6         |  |
| 2           | YMX-11-12-7-4-3  | 02:54:29 PM     | -24.68        | SR             | -0.0617        | 589           | 100.00       | 0.250               | 22.6         |  |
| 3           | YMX-11-12-7-4-3  | 02:54:37 PM     | -24.72        | SR             | -0.0618        | 589           | 100.00       | 0.250               | 22.6         |  |
| 4           | YMX-11-12-7-4-3  | 02:54:45 PM     | -24.64        | SR             | -0.0616        | 589           | 100.00       | 0.250               | 22.6         |  |
| 5           | YMX-11-12-7-4-3  | 02:54:53 PM     | -24.56        | SR             | -0.0614        | 589           | 100.00       | 0.250               | 22.6         |  |

Figure S41.  $[\alpha]^{25}_D$  of compound 4

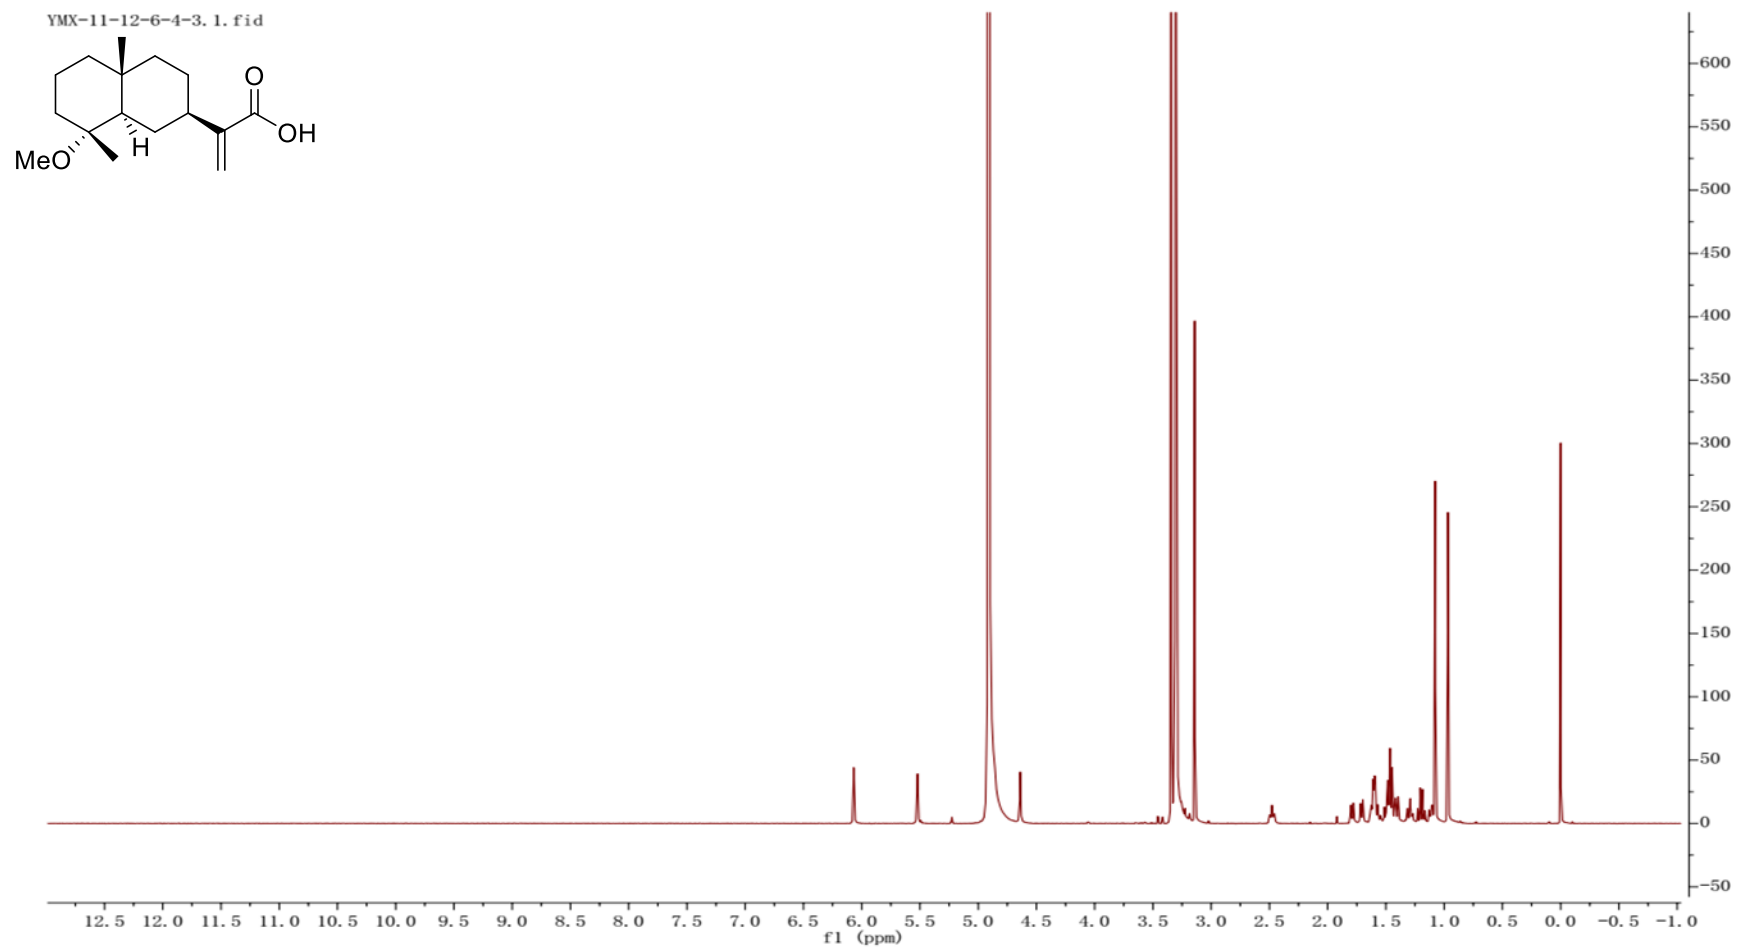

**Figure S42.** <sup>1</sup>H NMR spectrum of compound **5** (CD<sub>3</sub>OD, 600 MHz)

YMX-11-12-6-4-3. 3. fid

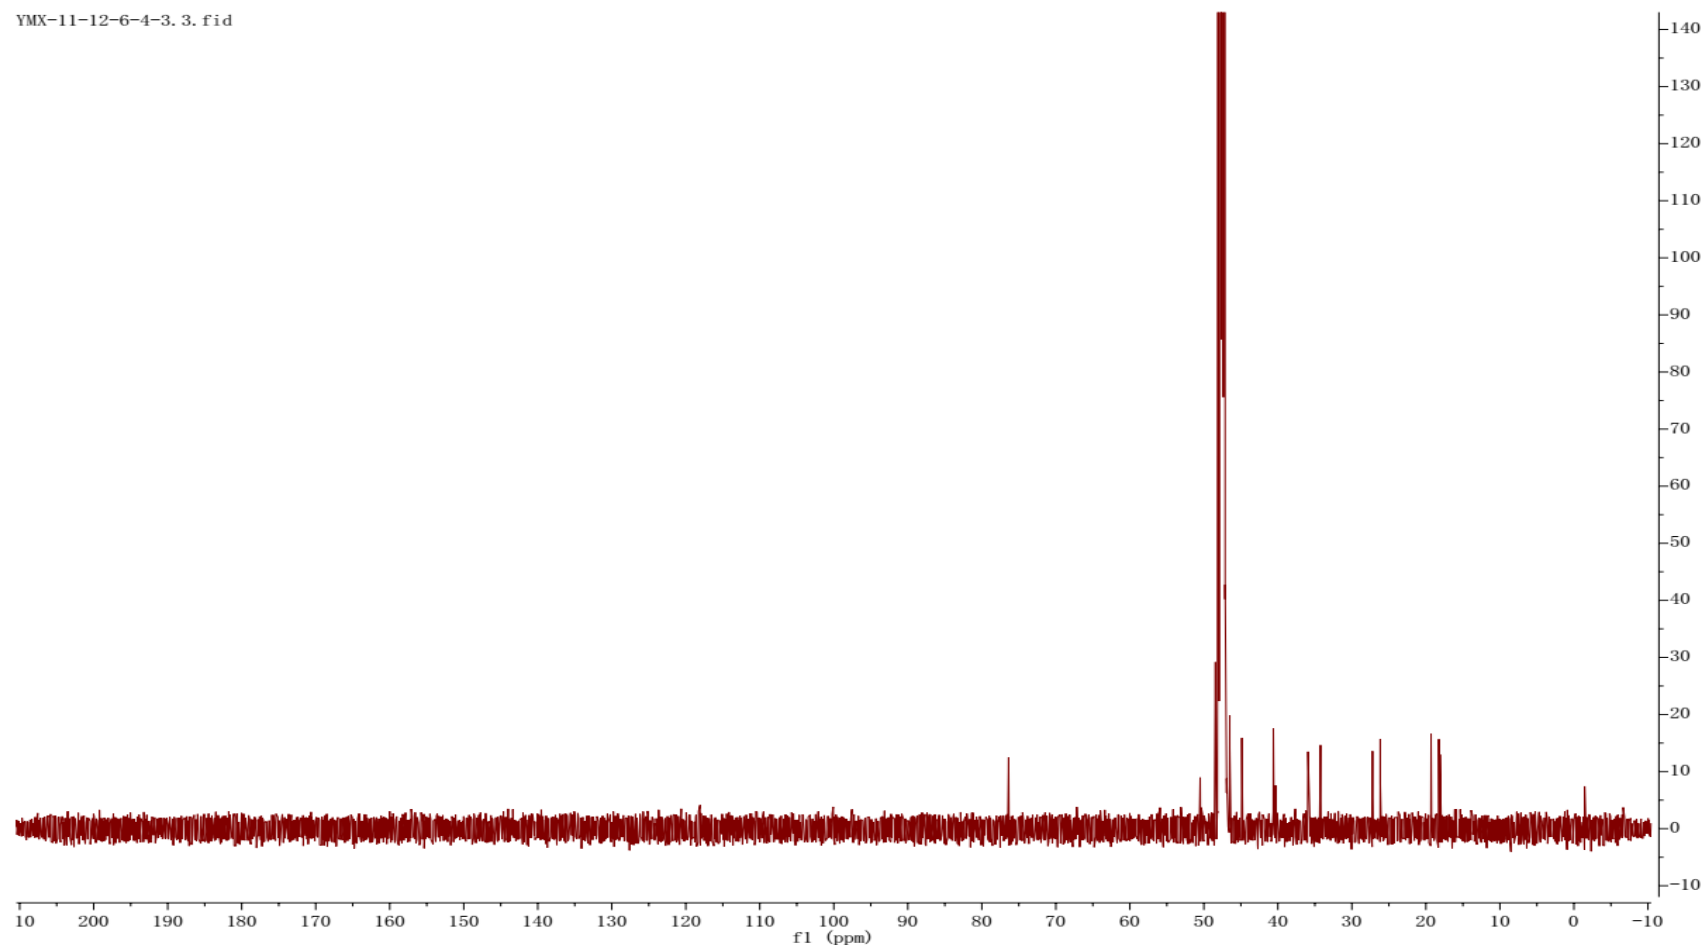

**Figure S43.**  $^{13}\text{C}$  NMR spectrum of compound **5** ( $\text{CD}_3\text{OD}$ , 150 MHz)

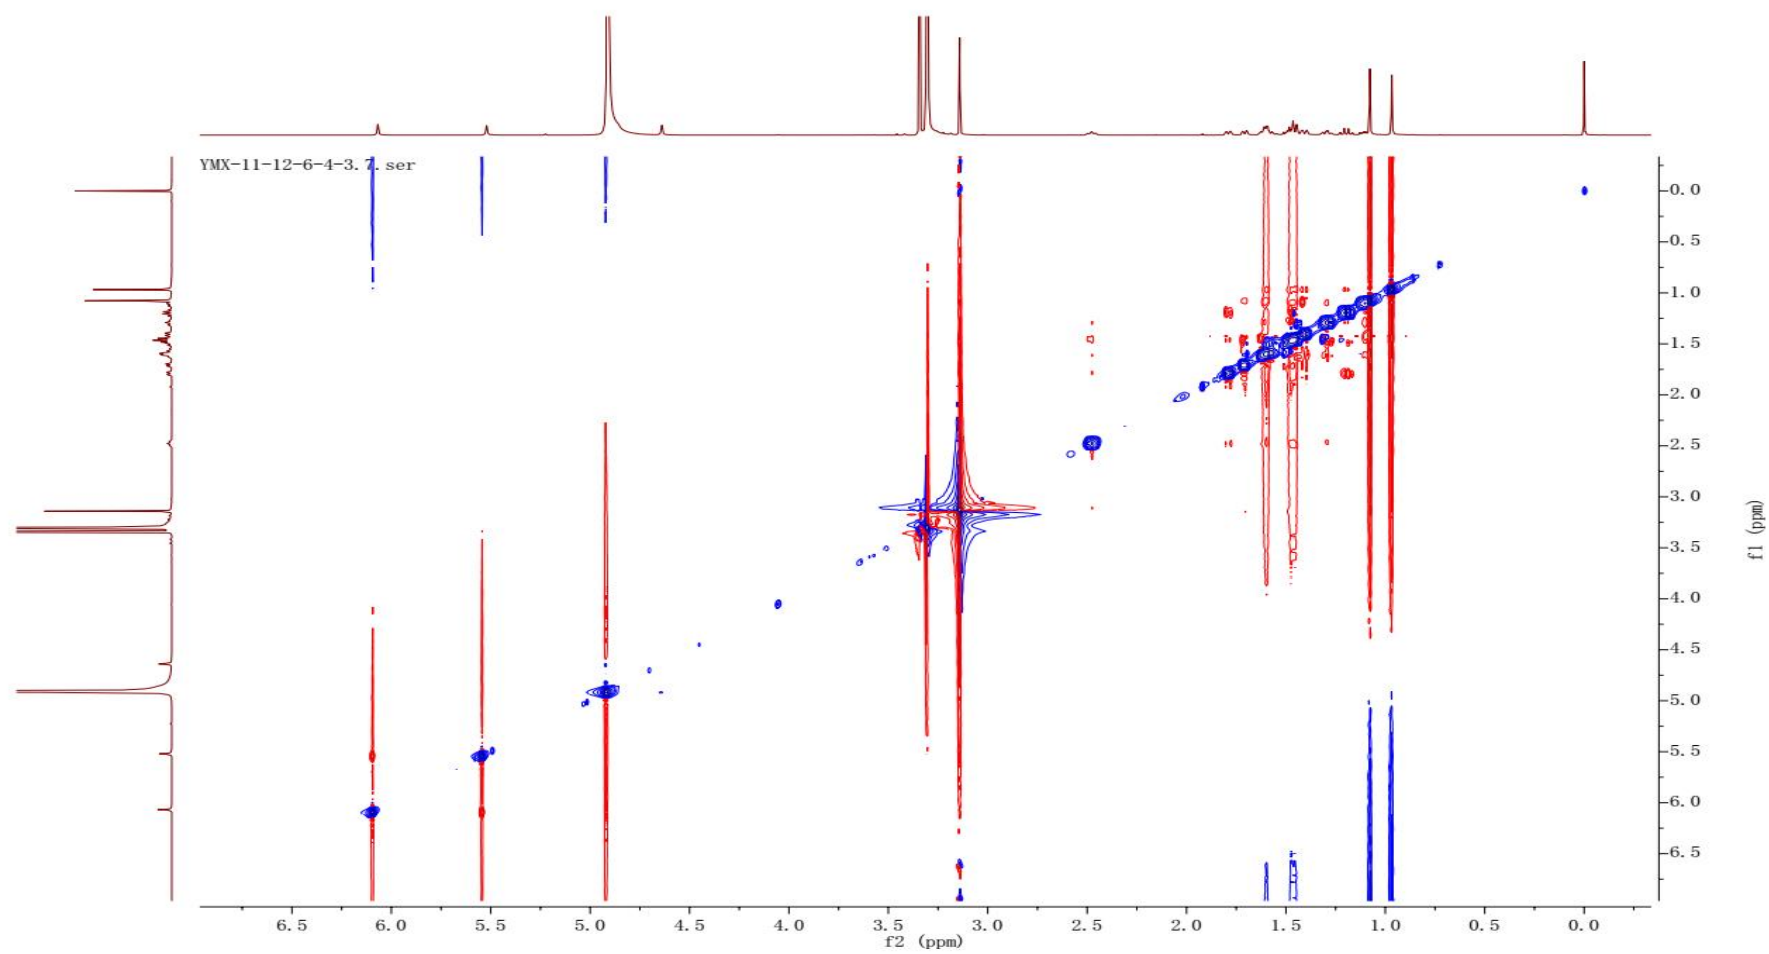

**Figure S44.** ROESY spectrum of compound **5** (CD<sub>3</sub>OD, 600 MHz)

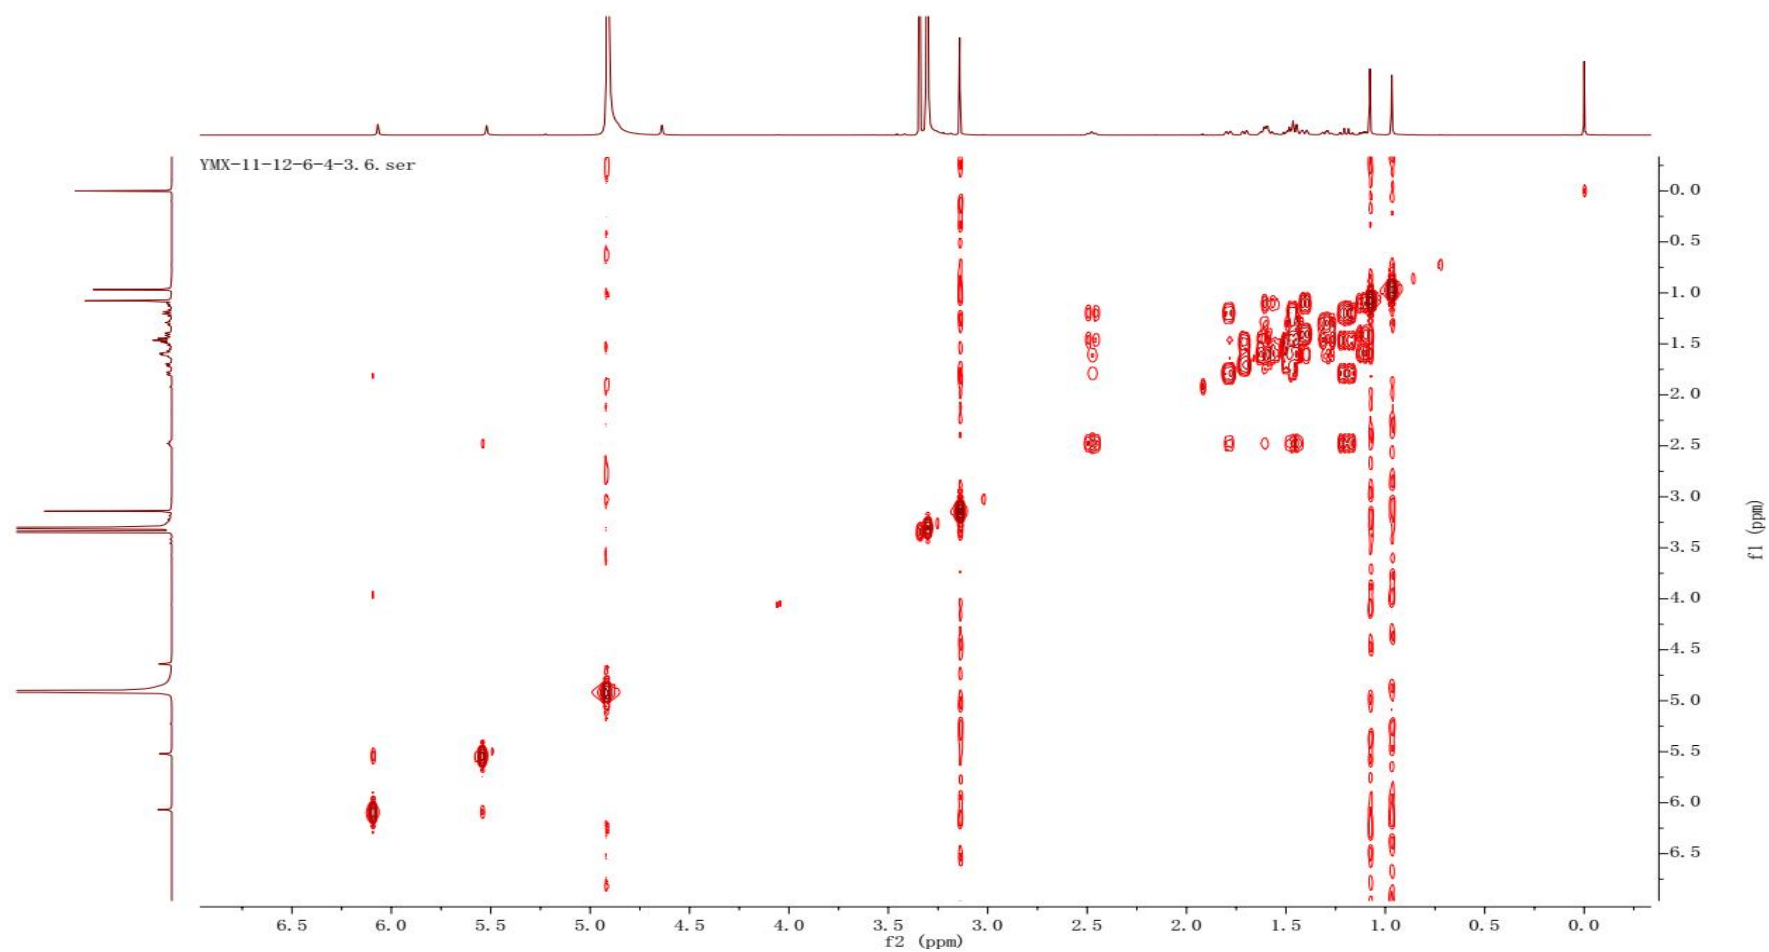

**Figure S45.**  $^1\text{H}$ - $^1\text{H}$  COSY spectrum of compound **5** ( $\text{CD}_3\text{OD}$ , 600 MHz)

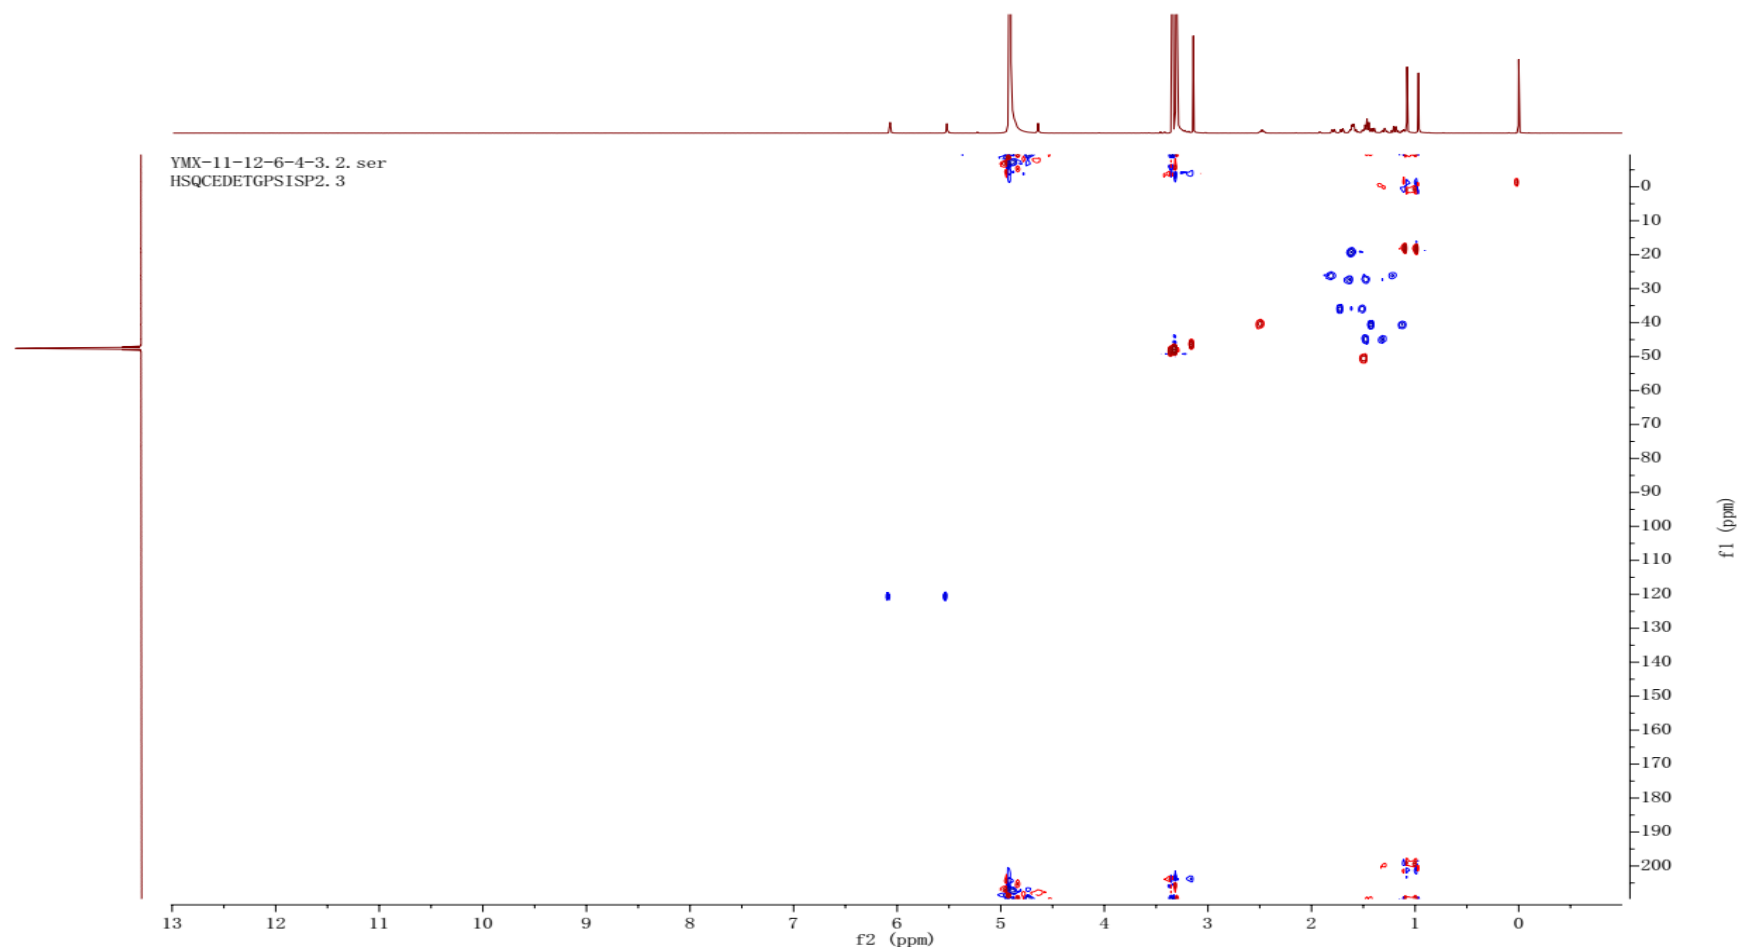

**Figure S46.** HSQC spectrum of compound **5** (CD<sub>3</sub>OD, 600 MHz)

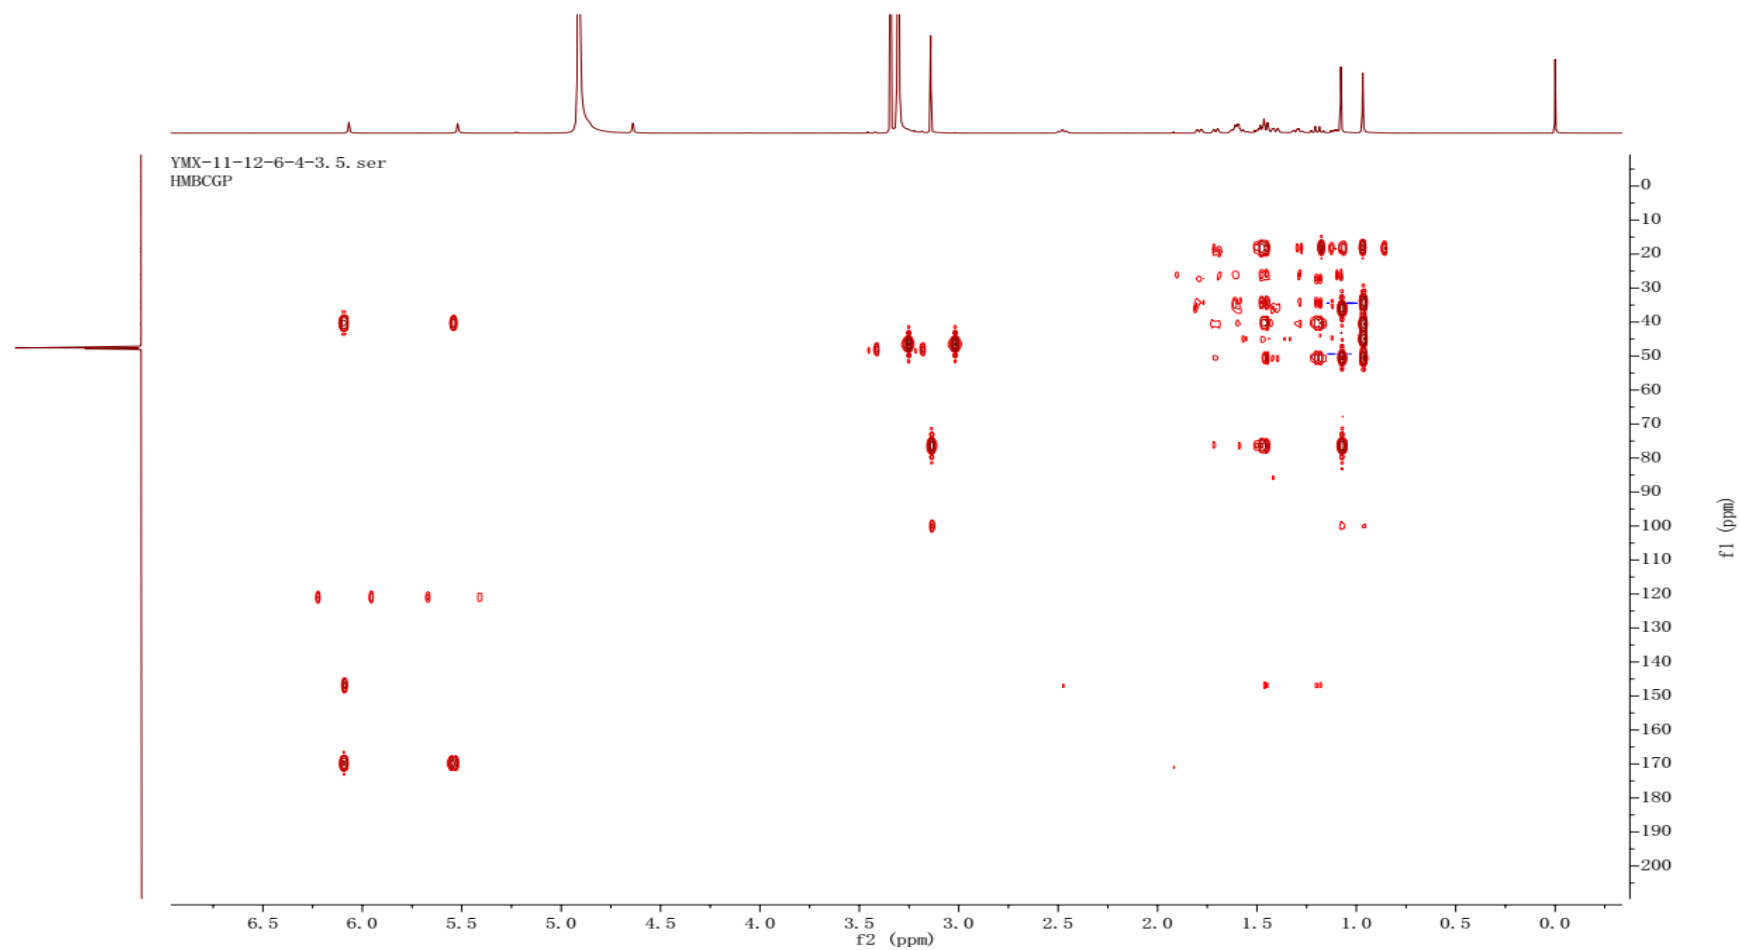

**Figure S47.** HMBC spectrum of compound **5** (CD<sub>3</sub>OD, 600 MHz)

## Qualitative Analysis Report

|                               |                             |                      |                      |
|-------------------------------|-----------------------------|----------------------|----------------------|
| <b>Data Filename</b>          | YMX-11-12-6-4-3.d           | <b>Sample Name</b>   | YMX-11-12-6-4-3      |
| <b>Sample Type</b>            | Sample                      | <b>Position</b>      | p1b7                 |
| <b>Instrument Name</b>        | Instrument 1                | <b>User Name</b>     | Q-TOF-HP\Q-TOF       |
| <b>Acq Method</b>             | default20190111-ms.m        | <b>Acquired Time</b> | 1/12/2020 3:56:11 PM |
| <b>IRM Calibration Status</b> | Success                     | <b>DA Method</b>     | 1.m                  |
| <b>Comment</b>                |                             |                      |                      |
| <b>Sample Group</b>           | 6200 series TOF/6500 series | <b>Info.</b>         |                      |
| <b>Acquisition SW</b>         | Q-TOF B.05.01 (B5125.3)     |                      |                      |
| <b>Version</b>                |                             |                      |                      |

### User Chromatograms

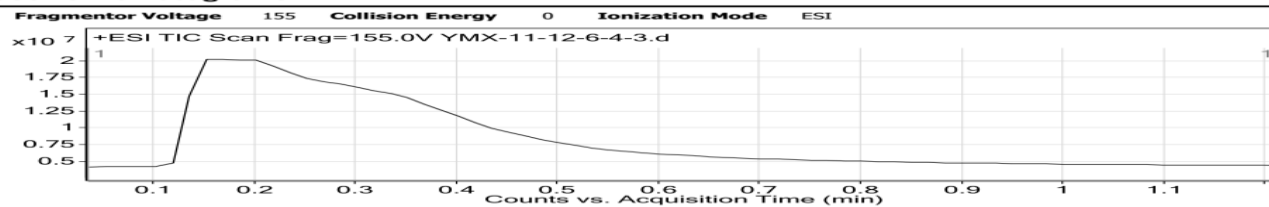

### User Spectra

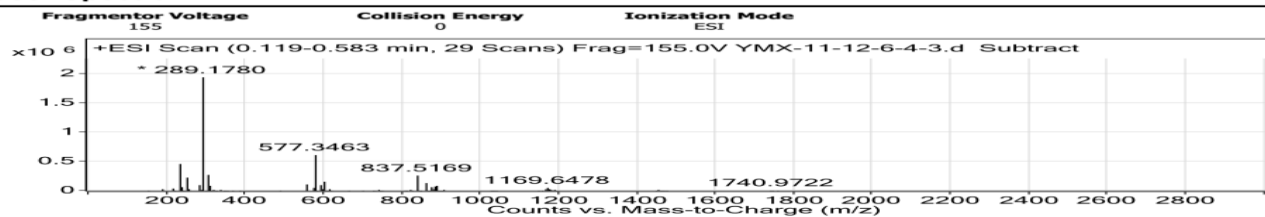

#### Peak List

| m/z      | z | Abund      |
|----------|---|------------|
| 235.1682 | 1 | 466617.69  |
| 252.1947 | 1 | 229973.59  |
| 289.178  | 1 | 1947617.25 |
| 290.1797 | 1 | 470698.53  |
| 305.1497 | 1 | 283320.63  |
| 577.3463 | 1 | 622858.25  |
| 578.3492 | 1 | 192049.98  |
| 599.3274 | 1 | 159994.36  |

Figure S48. HRESI spectrum of compound 5

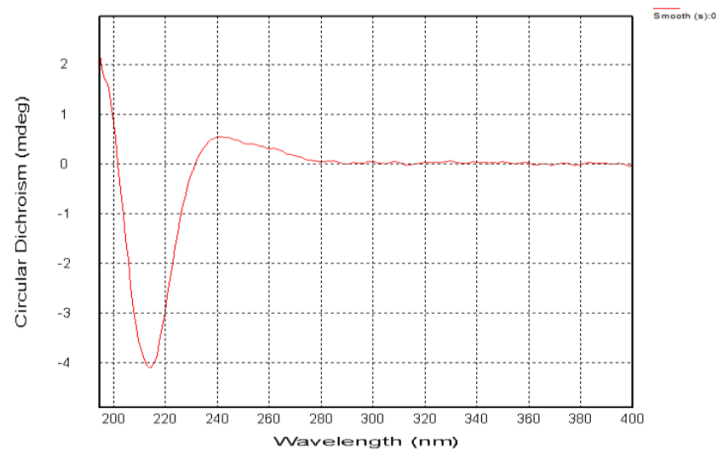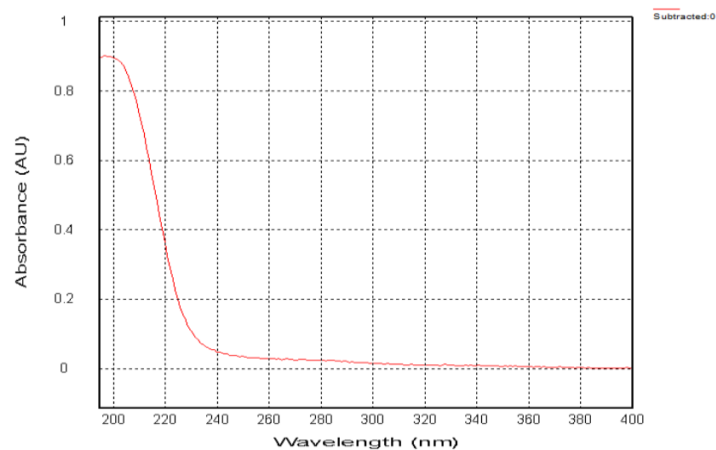

File: YMX-11-12-6-4-3 (195-400 nm) 20112717.dsx

ProBinaryX

Attributes :

- Time Stamp :Fri Nov 27 19:34:36 2020

- File ID : {E3C61445-D6E4-4321-8A56-F058D491F92A}

- Is CFR Compliant : false

- Original data has not been modified.

Remarks:

- User: CD

- Date: 2020/11/27

- Instrument: 0547

- DetectorType: LAAPD

- DichOS Calibration Correction Curve: 0547/2

- HV (CDDC channel): 0 v

- Time per point: 1 s

- Description: Sample 1

- Concentration: 0.3300mg/mL MeOH

- Pathlength: 1 mm

- Temperature: 20°C

Settings:

- Time-per-point: 1s (25us x 40000)

- SE

- Wavelength: 195nm - 400nm

- Step Size: 1nm

- Bandwidth: 1nm

**Figure S49.** CD and UV spectrum of compound **5**

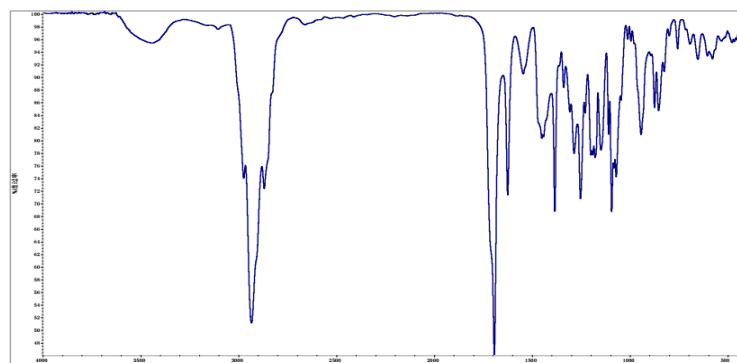

Sample Name: YMX-11-12-6-4-3  
KBr压片  
采集时间: 星期三 10月 28 15:50:22 2020 (GMT+08:00)  
仪器型号: NICOLET IS10  
Software version: OMNIC 9.8.372

样品扫描次数: 16  
背景扫描次数: 16  
分辨率: 4.000  
采样增益: 1.0  
扫描速度: 0.4747  
光阑: 80.00

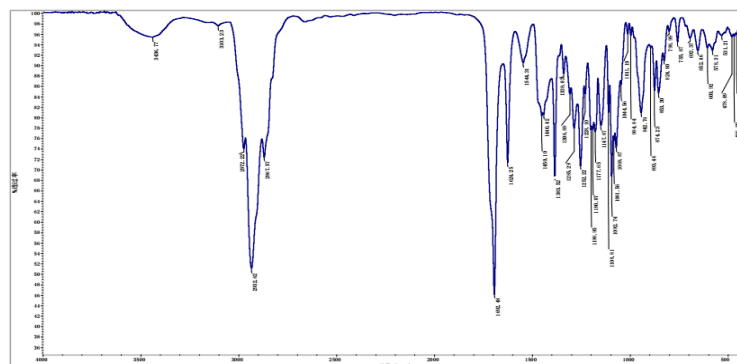

Sample Name: YMX-11-12-6-4-3  
KBr压片  
采集时间: 星期三 10月 28 15:50:22 2020 (GMT+08:00)  
仪器型号: NICOLET IS10  
Software version: OMNIC 9.8.372

样品扫描次数: 16  
背景扫描次数: 16  
分辨率: 4.000  
采样增益: 1.0  
扫描速度: 0.4747  
光阑: 80.00

星期三 10月 28 16:17:58 2020 (GMT+08:00)

标峰:

谱图: YMX-11-12-6-4-3  
范围: 4000.00 400.00  
(绝对) 阈值: 98.027  
灵敏度: 99

峰表:

|      |         |     |        |
|------|---------|-----|--------|
| 峰位置: | 412.82  | 强度: | 96.662 |
| 峰位置: | 428.77  | 强度: | 95.522 |
| 峰位置: | 453.94  | 强度: | 95.875 |
| 峰位置: | 466.80  | 强度: | 95.609 |
| 峰位置: | 478.09  | 强度: | 95.467 |
| 峰位置: | 531.21  | 强度: | 95.695 |
| 峰位置: | 578.31  | 强度: | 92.856 |
| 峰位置: | 603.92  | 强度: | 93.347 |
| 峰位置: | 652.46  | 强度: | 92.811 |
| 峰位置: | 692.37  | 强度: | 95.215 |
| 峰位置: | 755.87  | 强度: | 94.485 |
| 峰位置: | 798.99  | 强度: | 96.532 |
| 峰位置: | 824.80  | 强度: | 90.853 |
| 峰位置: | 853.30  | 强度: | 84.659 |
| 峰位置: | 874.23  | 强度: | 85.192 |
| 峰位置: | 893.46  | 强度: | 93.418 |
| 峰位置: | 942.76  | 强度: | 80.892 |
| 峰位置: | 994.84  | 强度: | 95.705 |
| 峰位置: | 1011.10 | 强度: | 95.968 |
| 峰位置: | 1044.56 | 强度: | 86.363 |
| 峰位置: | 1069.87 | 强度: | 74.184 |
| 峰位置: | 1081.56 | 强度: | 75.599 |
| 峰位置: | 1092.74 | 强度: | 68.662 |
| 峰位置: | 1108.81 | 强度: | 80.982 |
| 峰位置: | 1147.87 | 强度: | 78.456 |
| 峰位置: | 1177.65 | 强度: | 77.247 |
| 峰位置: | 1190.07 | 强度: | 77.700 |
| 峰位置: | 1198.95 | 强度: | 77.649 |
| 峰位置: | 1228.10 | 强度: | 84.290 |
| 峰位置: | 1252.22 | 强度: | 70.643 |
| 峰位置: | 1285.29 | 强度: | 77.882 |
| 峰位置: | 1306.89 | 强度: | 84.494 |
| 峰位置: | 1338.03 | 强度: | 88.230 |
| 峰位置: | 1383.52 | 强度: | 68.059 |
| 峰位置: | 1440.42 | 强度: | 80.577 |
| 峰位置: | 1450.10 | 强度: | 80.296 |
| 峰位置: | 1544.31 | 强度: | 90.498 |
| 峰位置: | 1624.25 | 强度: | 71.351 |
| 峰位置: | 1692.48 | 强度: | 46.060 |
| 峰位置: | 2867.57 | 强度: | 72.352 |
| 峰位置: | 2932.62 | 强度: | 51.049 |
| 峰位置: | 2972.22 | 强度: | 73.976 |
| 峰位置: | 3103.23 | 强度: | 97.566 |
| 峰位置: | 3436.77 | 强度: | 95.382 |

Figure S50. IR spectrum of compound 5

### **Rudolph Research Analytical**

This sample was measured on an Autopol VI, Serial #91058  
Manufactured by Rudolph Research Analytical, Hackettstown, NJ, USA.

Measurement Date : Thursday, 26-NOV-2020

Set Temperature : OFF

Time Delay : Disabled

Delay between Measurement : Disabled

| <u>n</u>    | <u>Average</u>   | <u>Std.Dev.</u> | <u>% RSD</u>  | <u>Maximum</u> | <u>Minimum</u> |               |              |                     |              |
|-------------|------------------|-----------------|---------------|----------------|----------------|---------------|--------------|---------------------|--------------|
| 5           | -29.43           | 0.11            | -0.37         | -29.33         | -29.60         |               |              |                     |              |
| <u>S.No</u> | <u>Sample ID</u> | <u>Time</u>     | <u>Result</u> | <u>Scale</u>   | <u>OR °Arc</u> | <u>WLG.nm</u> | <u>Lg.mm</u> | <u>Conc.g/100ml</u> | <u>Temp.</u> |
| 1           | YMX-11-12-6-4-3  | 02:24:56 PM     | -29.60        | SR             | -0.0444        | 589           | 100.00       | 0.150               | 22.8         |
| 2           | YMX-11-12-6-4-3  | 02:25:04 PM     | -29.33        | SR             | -0.0440        | 589           | 100.00       | 0.150               | 22.8         |
| 3           | YMX-11-12-6-4-3  | 02:25:12 PM     | -29.33        | SR             | -0.0440        | 589           | 100.00       | 0.150               | 22.8         |
| 4           | YMX-11-12-6-4-3  | 02:25:20 PM     | -29.47        | SR             | -0.0442        | 589           | 100.00       | 0.150               | 22.8         |
| 5           | YMX-11-12-6-4-3  | 02:25:28 PM     | -29.40        | SR             | -0.0441        | 589           | 100.00       | 0.150               | 22.9         |

Figure S51  $[\alpha]^{25}_D$  of compound 5

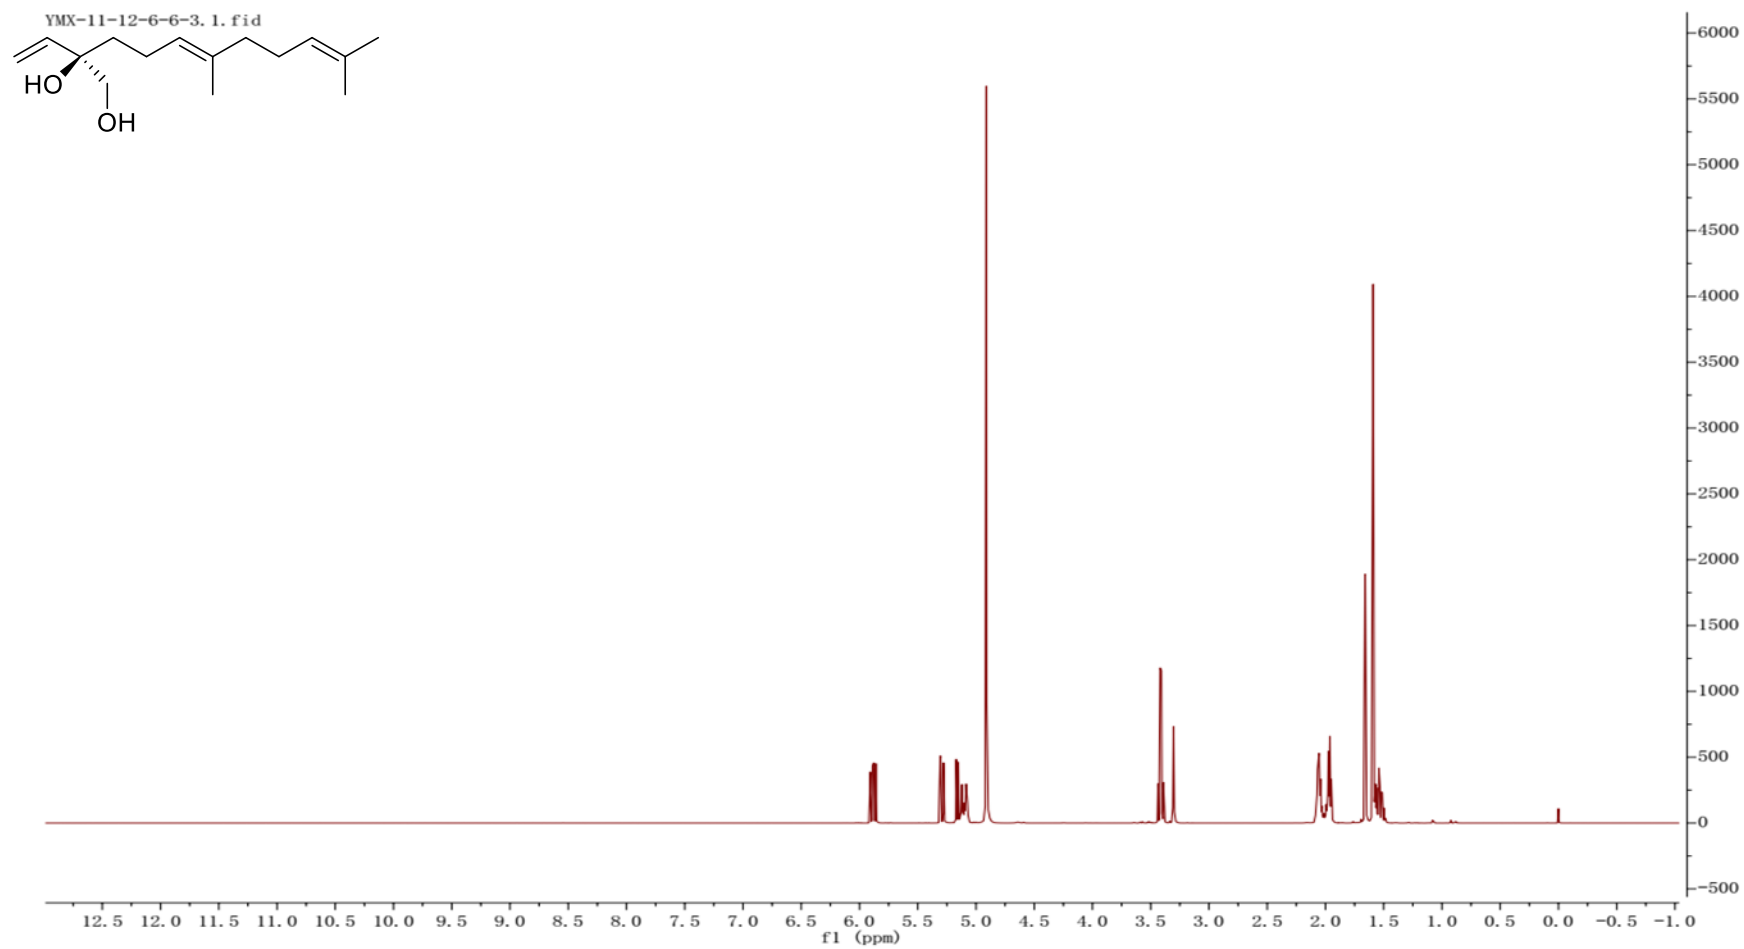

**Figure S52.**  $^1\text{H}$  NMR spectrum of compound **6** (CD<sub>3</sub>OD, 600 MHz)

YMX-11-12-6-6-3. 3. fid

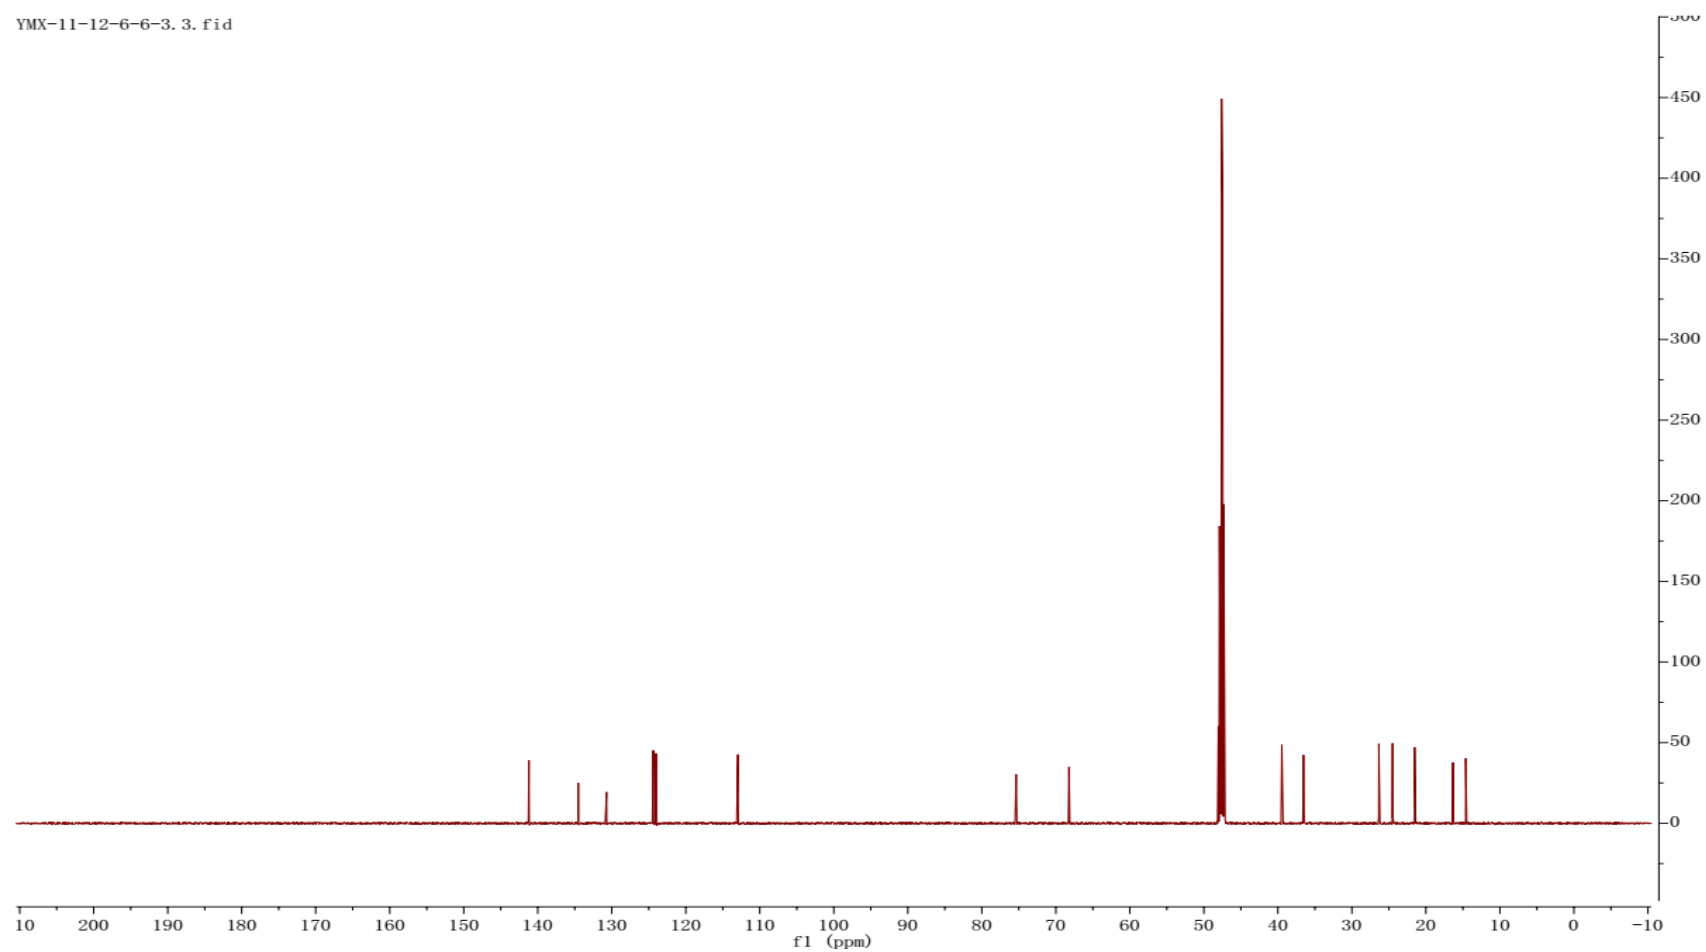

**Figure S53.**  $^{13}\text{C}$  NMR spectrum of compound **6** ( $\text{CD}_3\text{OD}$ , 150 MHz)

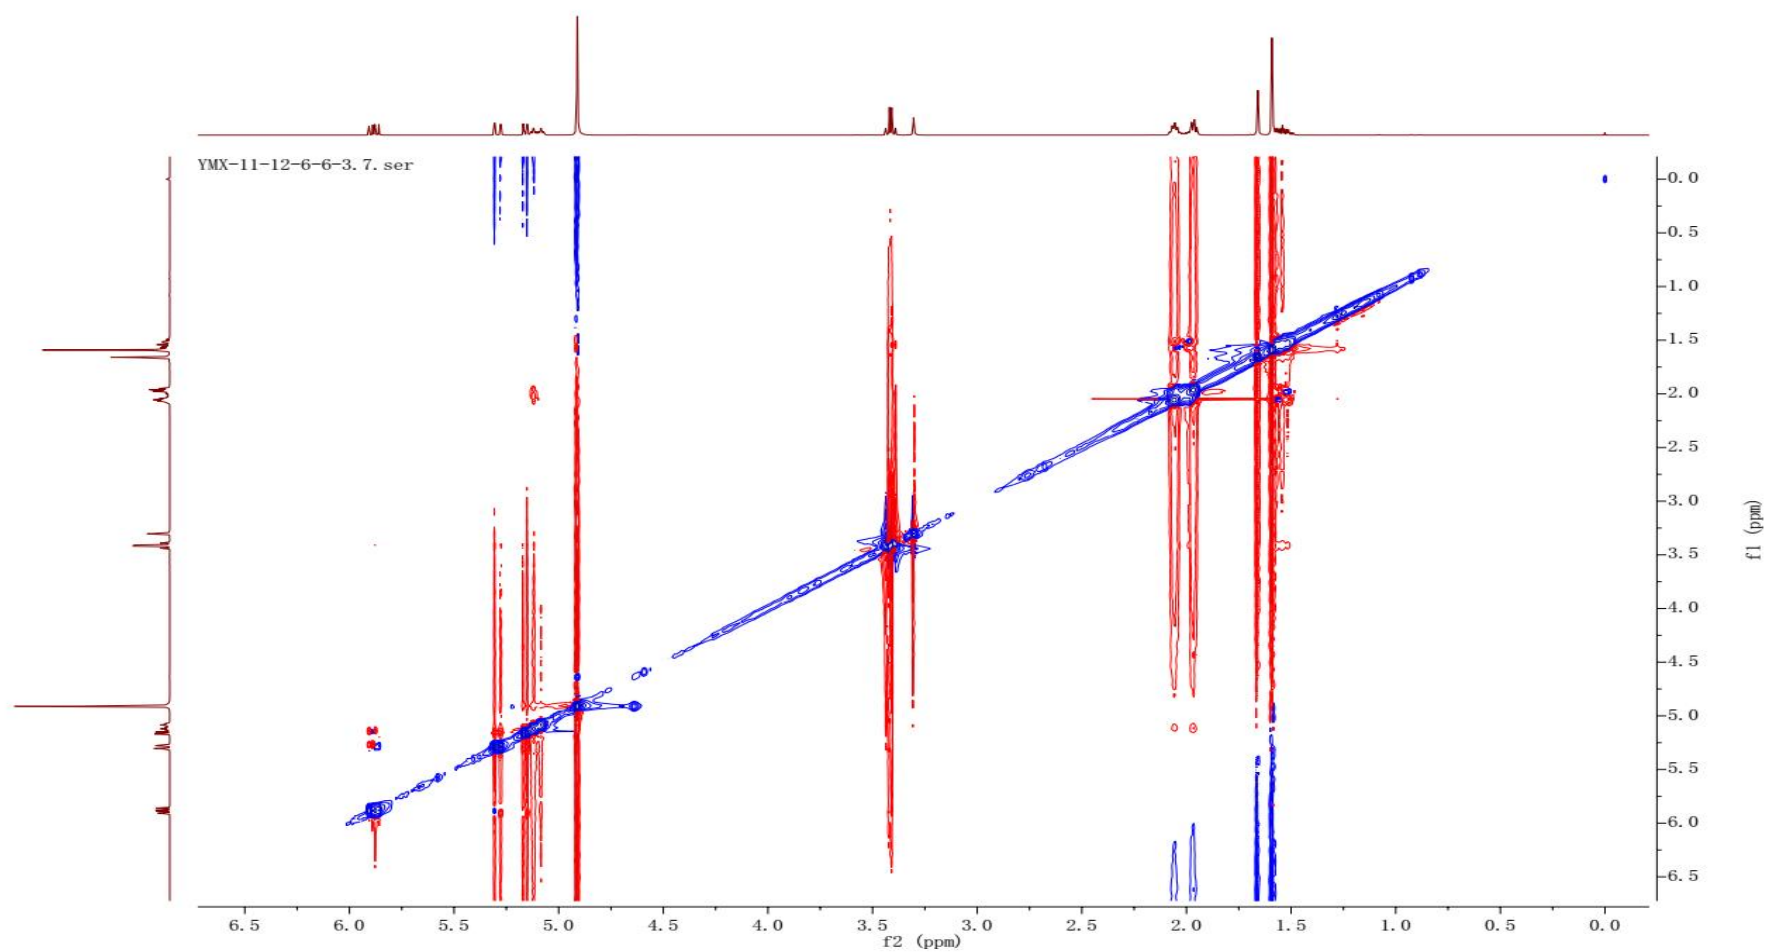

**Figure S54.** ROESY spectrum of compound **6** (CD<sub>3</sub>OD, 600 MHz)

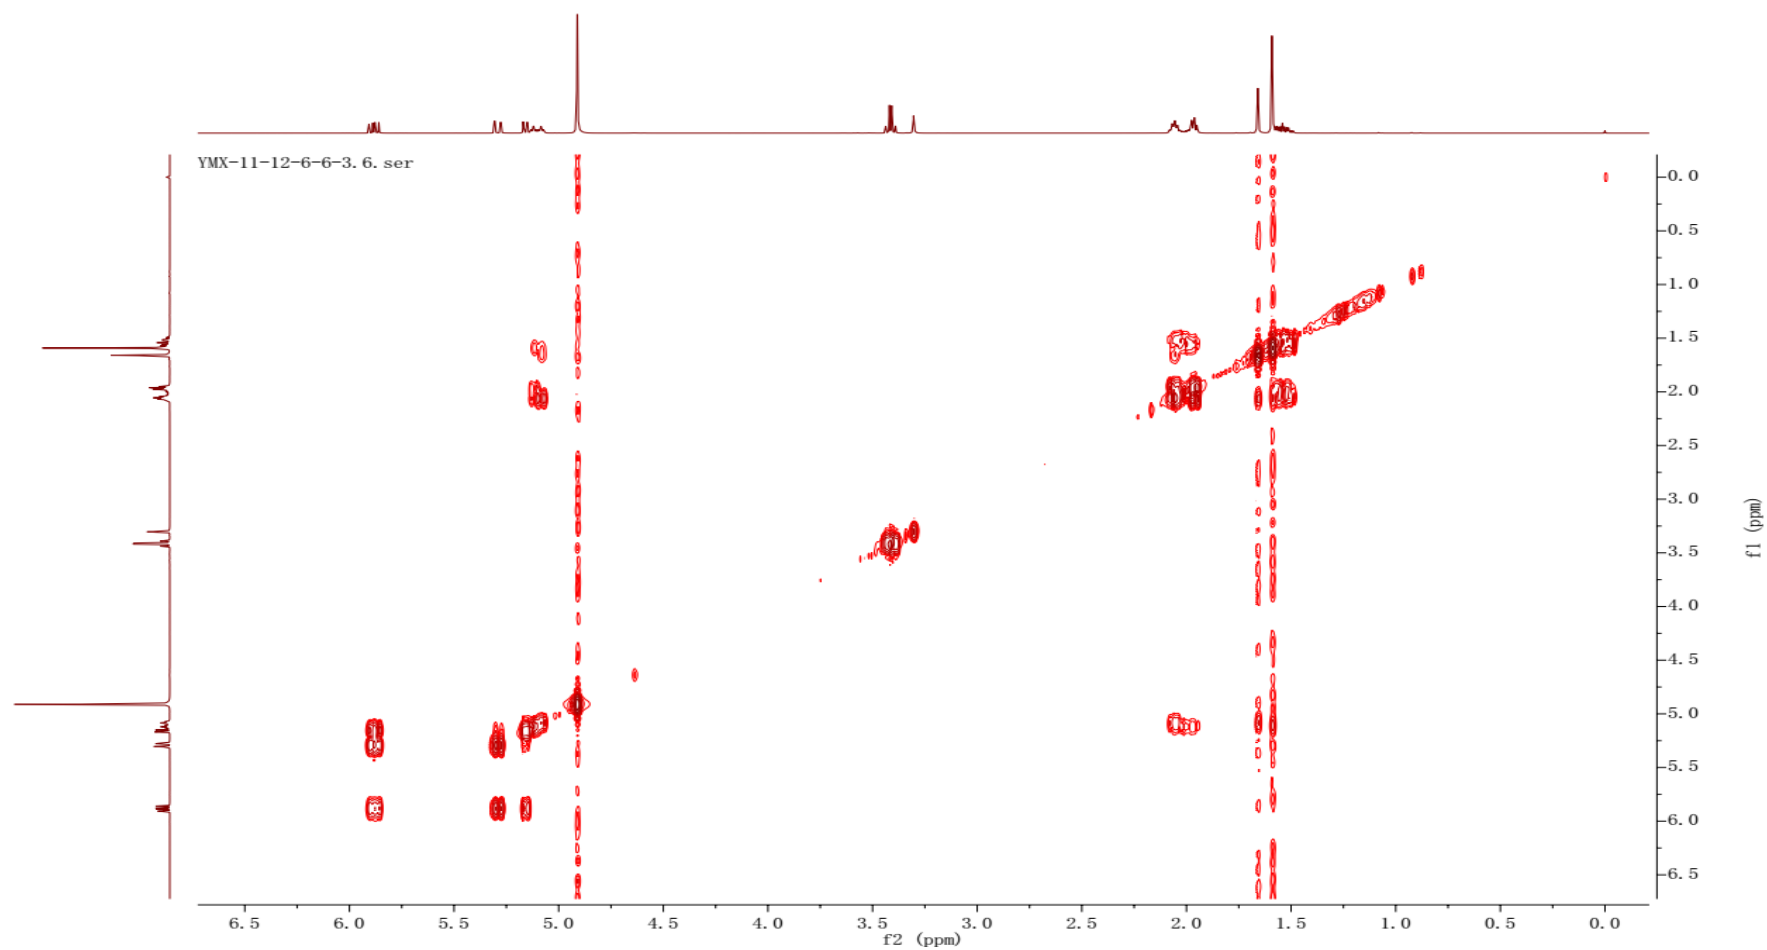

**Figure S55.**  $^1\text{H}$ - $^1\text{H}$  COSY spectrum of compound **6** ( $\text{CD}_3\text{OD}$ , 600 MHz)

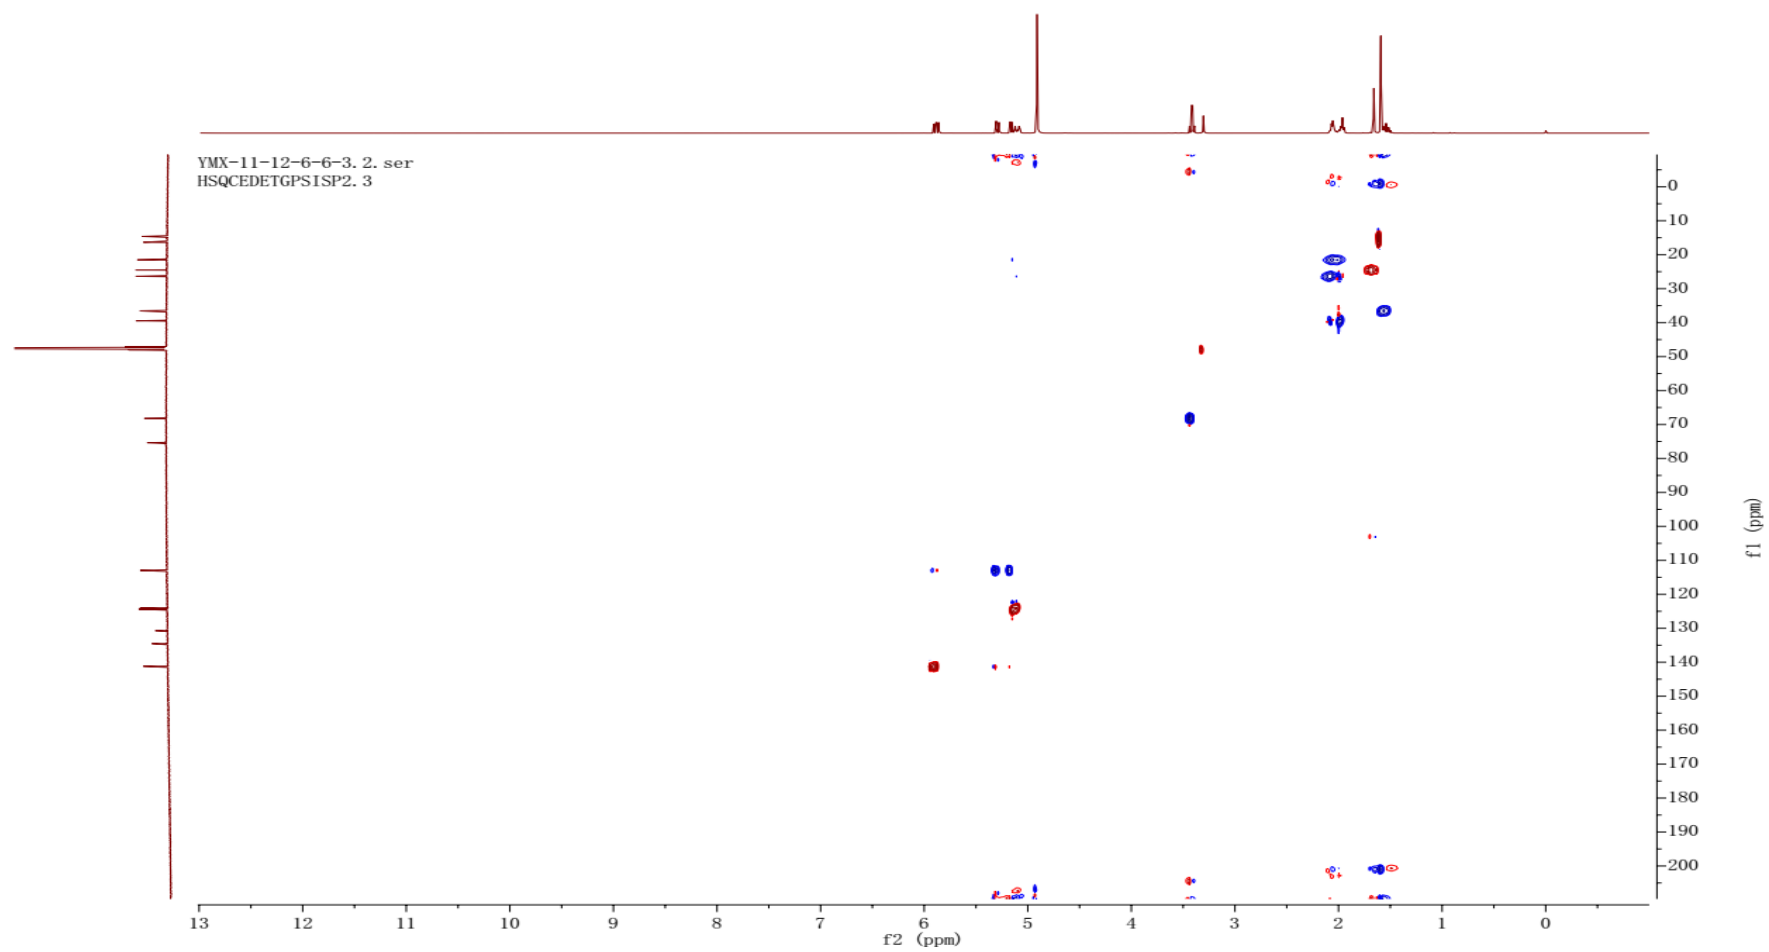

**Figure S56.** HSQC spectrum of compound **6** (CD<sub>3</sub>OD, 600 MHz)

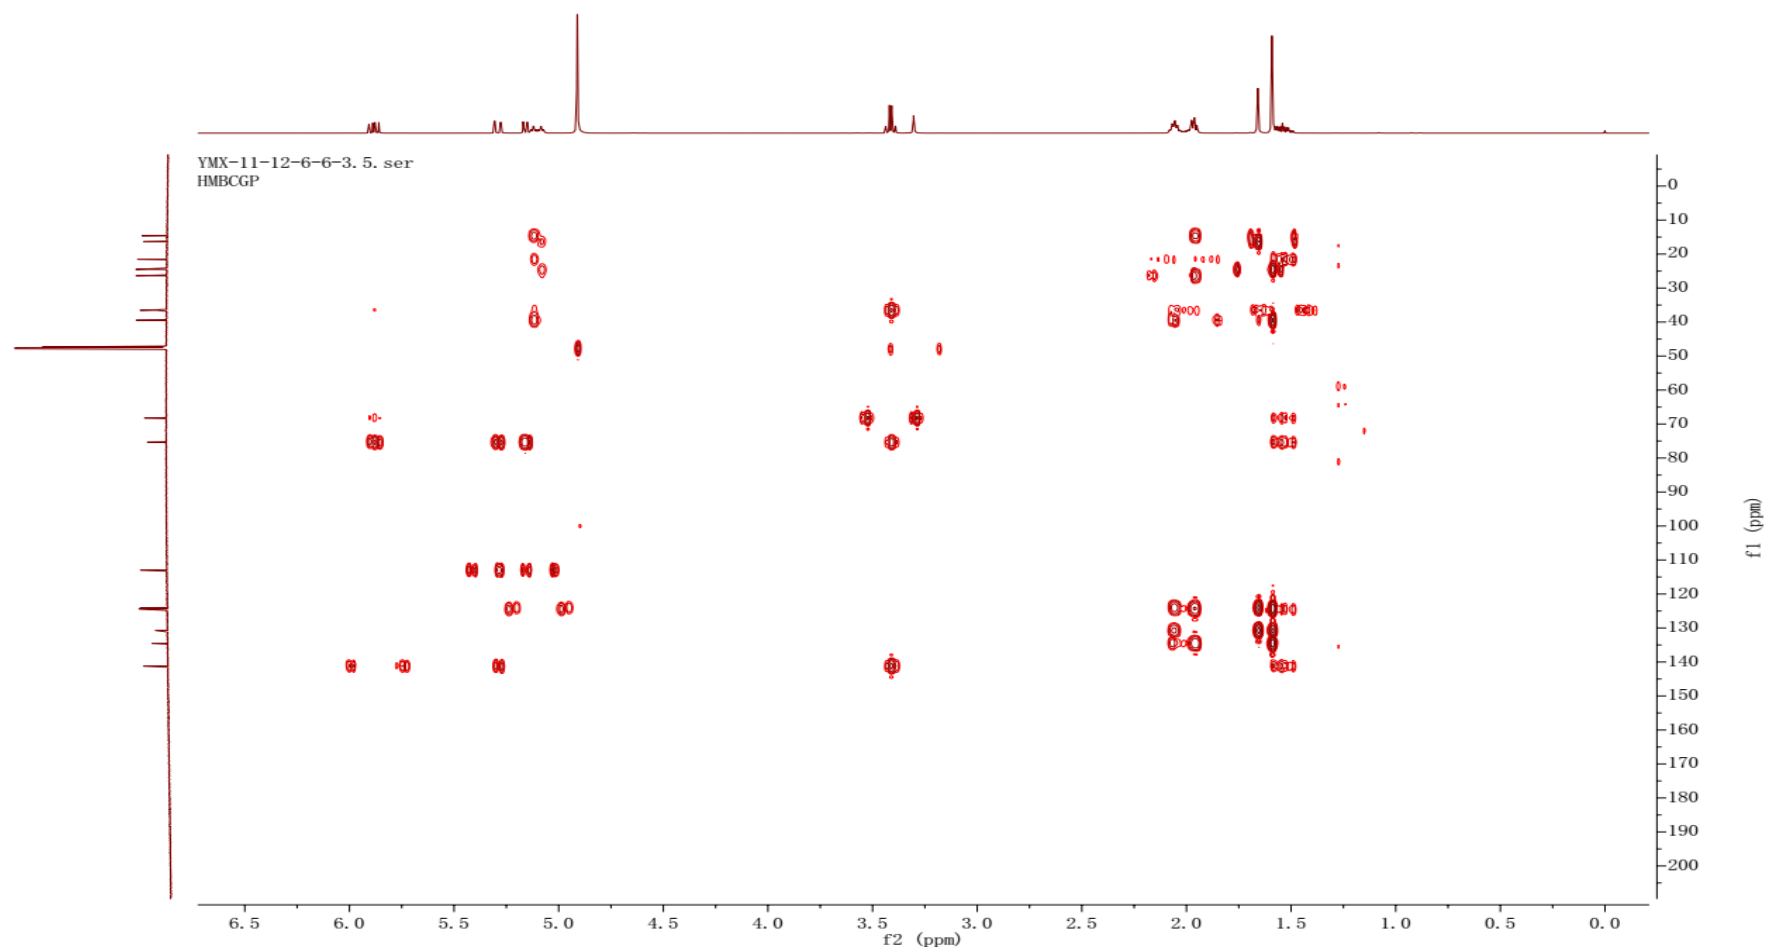

**Figure S57.** HMBC spectrum of compound **6** (CD<sub>3</sub>OD, 600 MHz)

## Qualitative Analysis Report

|                                                                                                                                                                                                                |                                                                                                                                                                                          |                                                                                                       |                                                                          |
|----------------------------------------------------------------------------------------------------------------------------------------------------------------------------------------------------------------|------------------------------------------------------------------------------------------------------------------------------------------------------------------------------------------|-------------------------------------------------------------------------------------------------------|--------------------------------------------------------------------------|
| <b>Data Filename</b><br><b>Sample Type</b><br><b>Instrument Name</b><br><b>Acq Method</b><br><b>IRM Calibration Status</b><br><b>Comment</b><br><b>Sample Group</b><br><b>Acquisition SW</b><br><b>Version</b> | YMX-11-12-6-6-3.d<br>Sample<br>Instrument 1<br>default20190111-ms.m<br><span style="background-color: #90EE90;">Success</span><br>6200 series TOF/6500 series<br>Q-TOF B.05.01 (B5125.3) | <b>Sample Name</b><br><b>Position</b><br><b>User Name</b><br><b>Acquired Time</b><br><b>DA Method</b> | YMX-11-12-6-6-3<br>p1c1<br>Q-TOF-HP\Q-TOF<br>1/12/2020 4:05:49 PM<br>1.m |
|----------------------------------------------------------------------------------------------------------------------------------------------------------------------------------------------------------------|------------------------------------------------------------------------------------------------------------------------------------------------------------------------------------------|-------------------------------------------------------------------------------------------------------|--------------------------------------------------------------------------|

Info.

### User Chromatograms

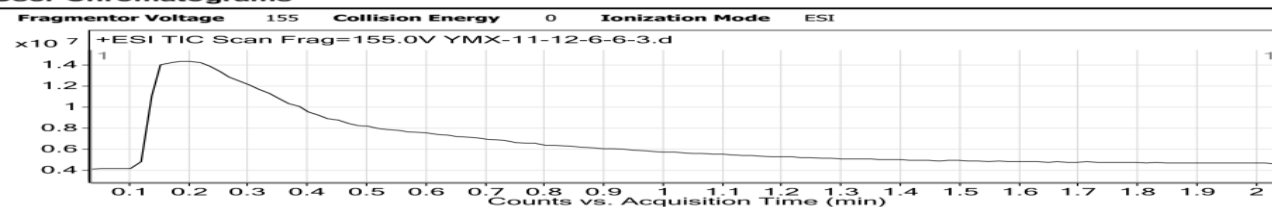

### User Spectra

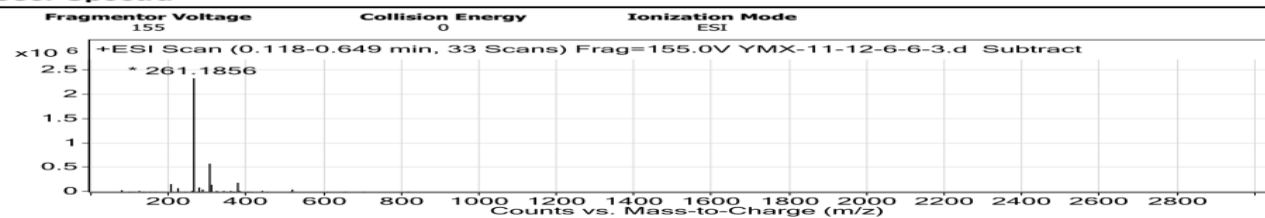

#### Peak List

| m/z      | z | Abund      |
|----------|---|------------|
| 203.1783 | 1 | 172827.08  |
| 261.1856 | 1 | 2338798.5  |
| 261.2774 | 1 | 96010.87   |
| 261.3213 | 1 | 342364     |
| 261.3655 | 1 | 121769.01  |
| 262.1851 | 1 | 1024942.81 |
| 277.1545 | 1 | 95900.87   |
| 303.1922 | 1 | 584750.81  |

Figure S58. HRESI spectrum of compound 6

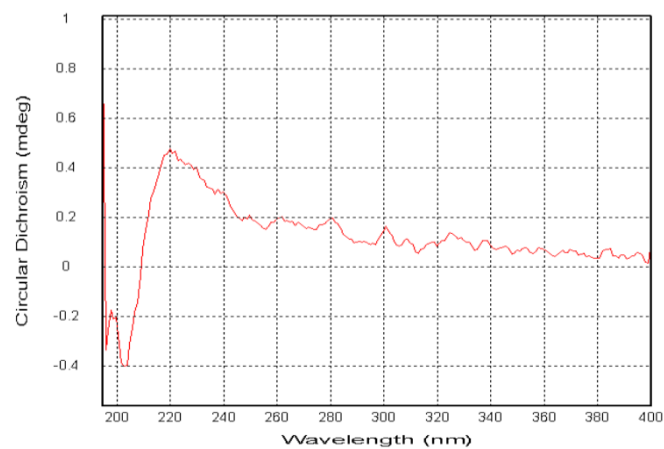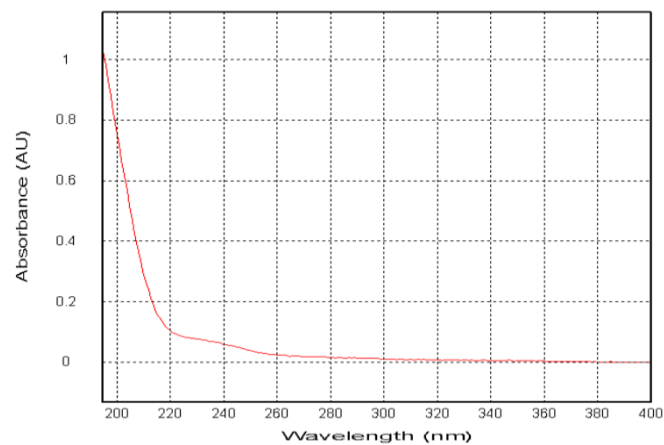

File: YMX-11-12-6-6-3 (195-400 nm) 20112720.dsx

ProBinaryX

Attributes :

- Time Stamp :Fri Nov 27 20:42:05 2020

- File ID : {6F3D91B5-42E8-473d-B607-7EE2ACF6B1BD}

- Is CFR Compliant : false

- Original data has not been modified.

Remarks:

- User: CD

- Date: 2020/11/27

- Instrument: 0547

- DetectorType: LAAPD

- DichOS Calibration Correction Curve: 0547/2

- HV (CDDC channel): 0 v

- Time per point: 1 s

- Description: Sample 1

- Concentration: 0.1500mg/mL MeOH

- Pathlength: 1 mm

- Temperature: 20°C

Settings:

- Time-per-point: 1s (25us x 40000)

- SE

- Wavelength: 195nm - 400nm

- Step Size: 1nm

- Bandwidth: 1nm

**Figure S59.** CD and UV spectrum of compound **6**

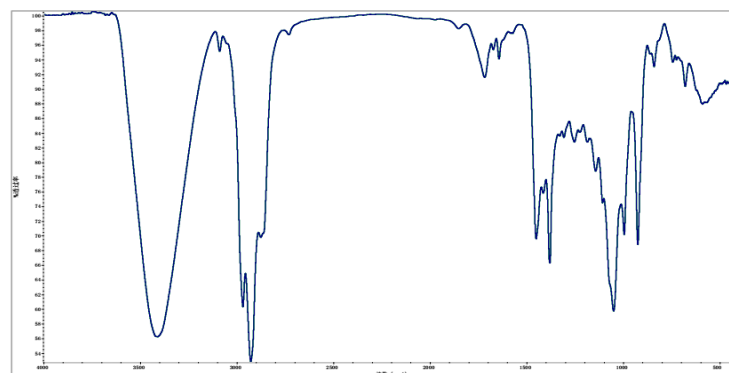

Sample Name: YMX-11-12-6-6-3  
KBr压片  
采集时间: 星期四 10月 29 11:29:49 2020 (GMT+08:00)  
仪器型号: NICOLET IS10  
Software version: OMNIC 9.8.372

样品扫描次数: 16  
背景扫描次数: 16  
分辨率: 4.000  
采样增益: 1.0  
扫描速度: 0.4747  
光阑: 80.00

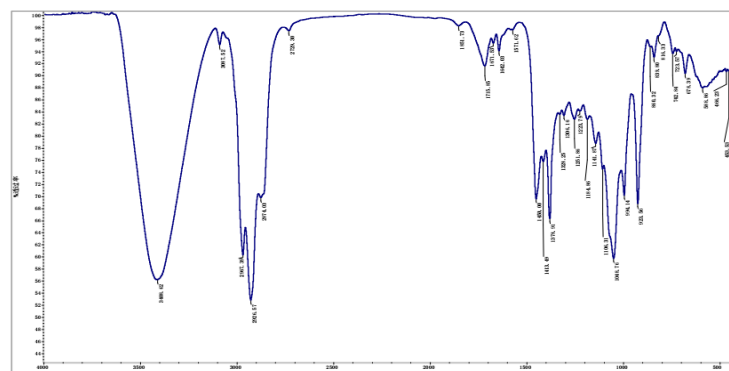

Sample Name: YMX-11-12-6-6-3  
KBr压片  
采集时间: 星期四 10月 29 11:29:49 2020 (GMT+08:00)  
仪器型号: NICOLET IS10  
Software version: OMNIC 9.8.372

样品扫描次数: 16  
背景扫描次数: 16  
分辨率: 4.000  
采样增益: 1.0  
扫描速度: 0.4747  
光阑: 80.00

星期四 10月 29 13:55:28 2020 (GMT+08:00)

标峰:

谱图: YMX-11-12-6-6-3  
范围: 4000.00 400.00  
(绝对) 阈值: 99.389  
灵敏度: 99

峰表:

| 峰位置:    | 强度:    |
|---------|--------|
| 410.39  | 93.079 |
| 421.03  | 92.003 |
| 437.63  | 91.084 |
| 453.53  | 90.767 |
| 466.23  | 90.657 |
| 488.75  | 90.640 |
| 497.17  | 90.619 |
| 588.86  | 87.915 |
| 678.39  | 90.326 |
| 723.57  | 93.959 |
| 742.84  | 93.655 |
| 839.80  | 93.032 |
| 860.32  | 94.743 |
| 923.56  | 68.766 |
| 994.14  | 70.116 |
| 1048.76 | 59.646 |
| 1106.31 | 74.437 |
| 1141.87 | 78.734 |
| 1184.86 | 82.714 |
| 1223.79 | 84.083 |
| 1251.86 | 82.717 |
| 1306.16 | 83.359 |
| 1328.25 | 83.547 |
| 1378.91 | 66.225 |
| 1413.49 | 75.733 |
| 1450.00 | 69.520 |
| 1571.62 | 97.551 |
| 1642.03 | 94.060 |
| 1671.53 | 95.362 |
| 1715.85 | 91.580 |
| 1851.73 | 98.214 |
| 2729.30 | 97.386 |
| 2874.03 | 69.723 |
| 2926.57 | 52.769 |
| 2967.39 | 60.236 |
| 3087.52 | 95.102 |
| 3408.62 | 56.161 |

Figure S60. IR spectrum of compound 6

### **Rudolph Research Analytical**

This sample was measured on an Autopol VI, Serial #91058  
Manufactured by Rudolph Research Analytical, Hackettstown, NJ, USA.

Measurement Date : Thursday, 26-NOV-2020

Set Temperature : OFF

Time Delay : Disabled

Delay between Measurement : Disabled

| <u>n</u>    | <u>Average</u>   | <u>Std.Dev.</u> | <u>% RSD</u>  | <u>Maximum</u> | <u>Minimum</u> |               |              |                     |              |  |
|-------------|------------------|-----------------|---------------|----------------|----------------|---------------|--------------|---------------------|--------------|--|
| 5           | 0.32             | 0.19            | 59.37         | 0.53           | 0.13           |               |              |                     |              |  |
| <u>S.No</u> | <u>Sample ID</u> | <u>Time</u>     | <u>Result</u> | <u>Scale</u>   | <u>OR °Arc</u> | <u>WLG.nm</u> | <u>Lg.mm</u> | <u>Conc.g/100ml</u> | <u>Temp.</u> |  |
| 1           | YMX-11-12-6-6-3  | 03:01:40 PM     | 0.13          | SR             | 0.0002         | 589           | 100.00       | 0.150               | 22.5         |  |
| 2           | YMX-11-12-6-6-3  | 03:01:48 PM     | 0.47          | SR             | 0.0007         | 589           | 100.00       | 0.150               | 22.5         |  |
| 3           | YMX-11-12-6-6-3  | 03:01:56 PM     | 0.13          | SR             | 0.0002         | 589           | 100.00       | 0.150               | 22.5         |  |
| 4           | YMX-11-12-6-6-3  | 03:02:05 PM     | 0.33          | SR             | 0.0005         | 589           | 100.00       | 0.150               | 22.5         |  |
| 5           | YMX-11-12-6-6-3  | 03:02:12 PM     | 0.53          | SR             | 0.0008         | 589           | 100.00       | 0.150               | 22.5         |  |

Figure S61.  $[\alpha]^{25}_D$  of compound 6

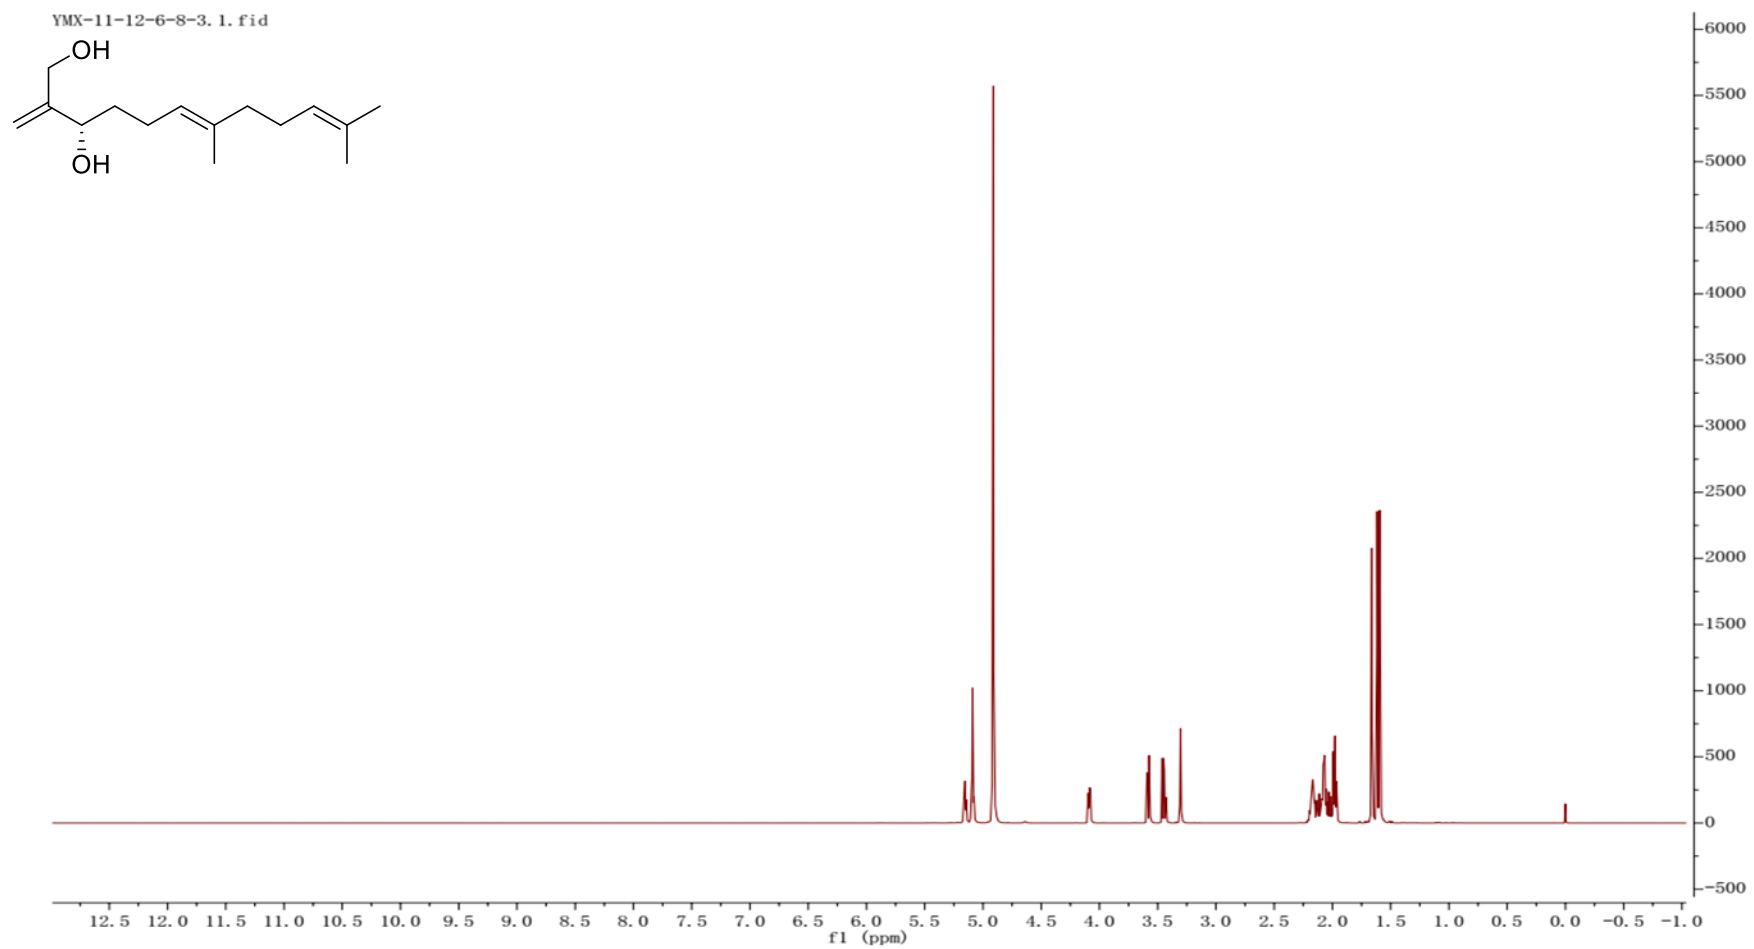

**Figure S62.**  $^1\text{H}$  NMR spectrum of compound **7** (CD<sub>3</sub>OD, 600 MHz)

YMX-11-12-6-8-3. 3. fid

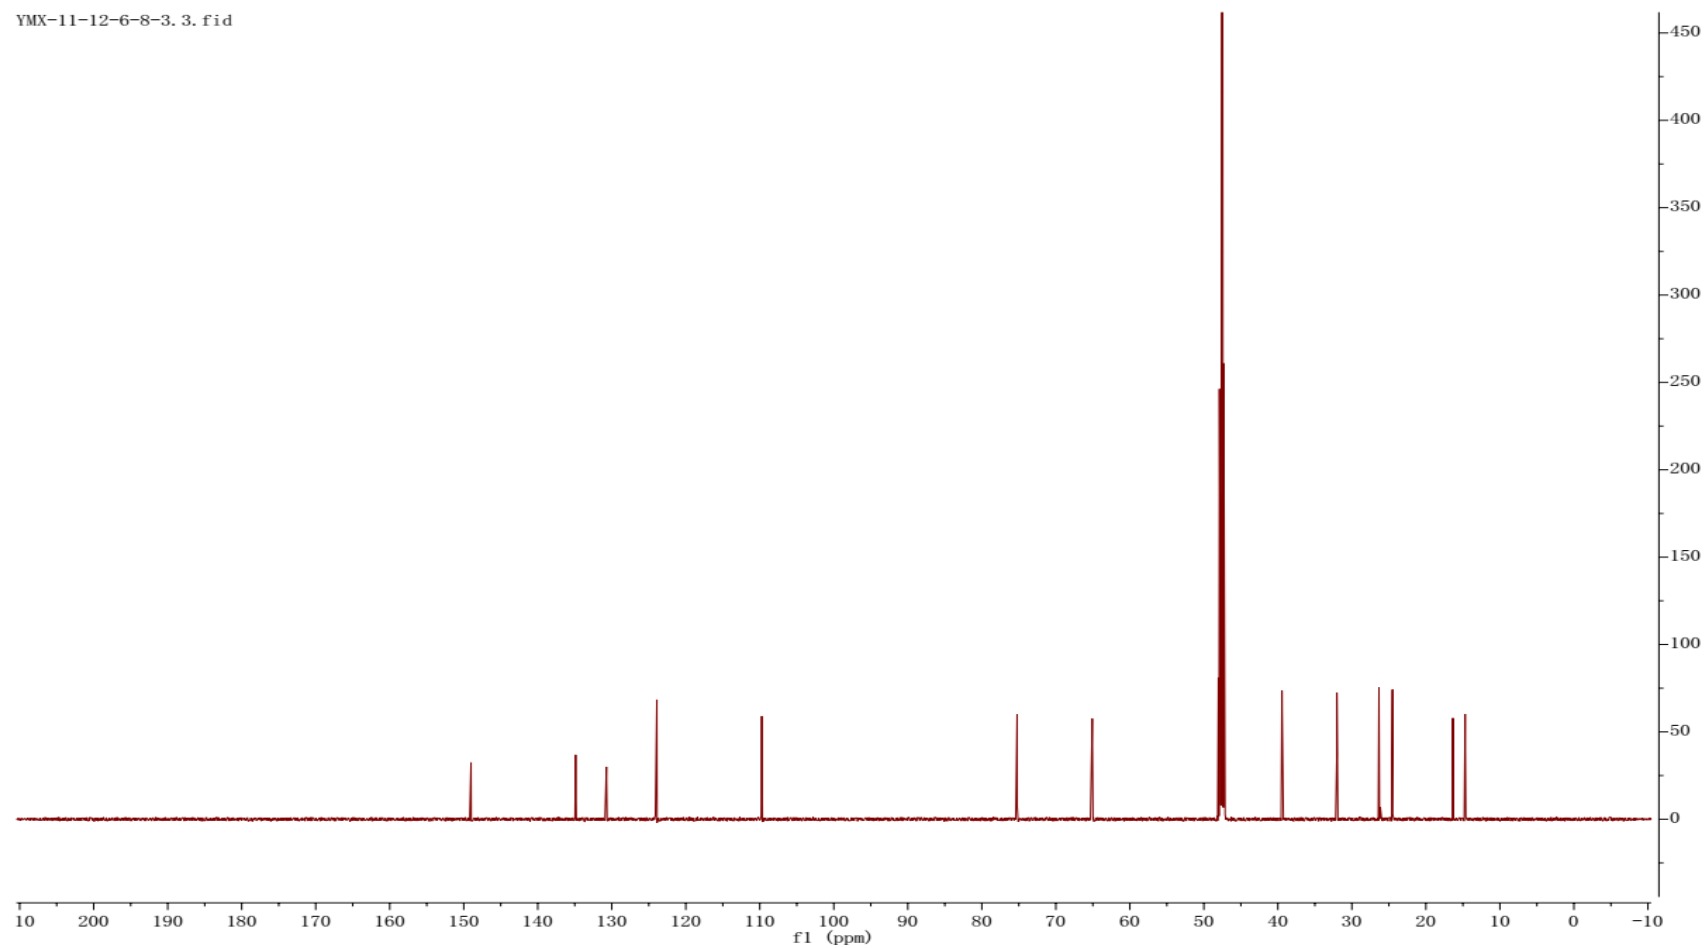

**Figure S63.**  $^{13}\text{C}$  NMR spectrum of compound **7** ( $\text{CD}_3\text{OD}$ , 150 MHz)

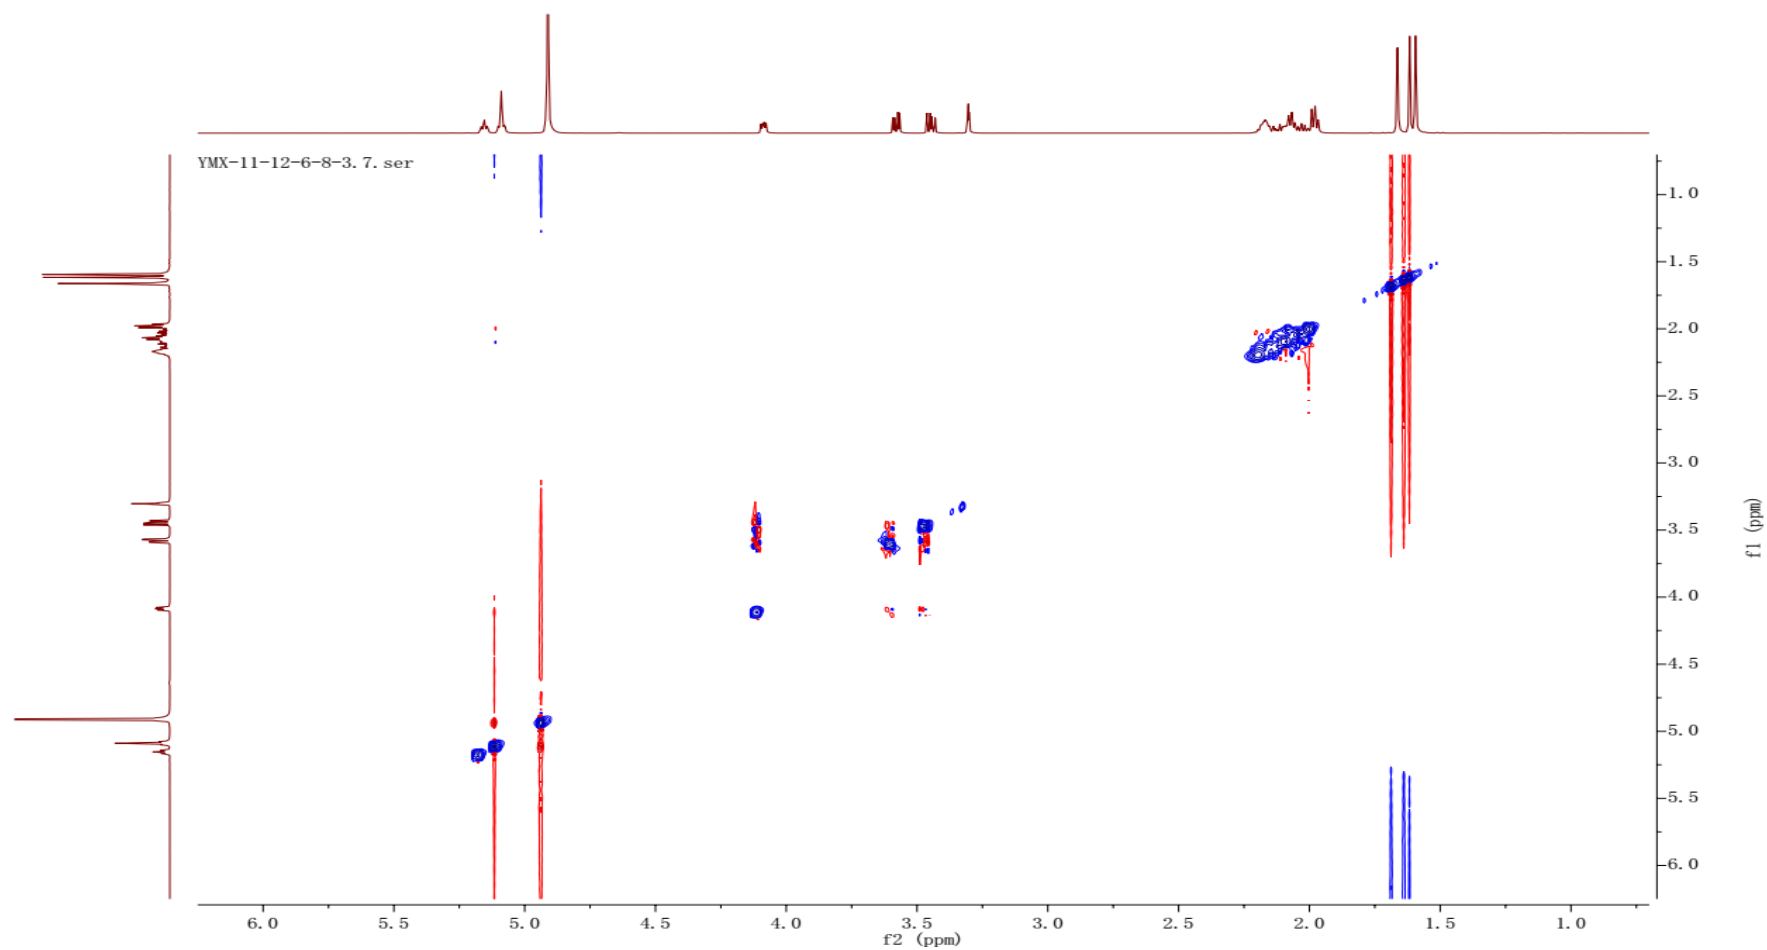

**Figure S64.** ROESY spectrum of compound **7** (CD<sub>3</sub>OD, 600 MHz)

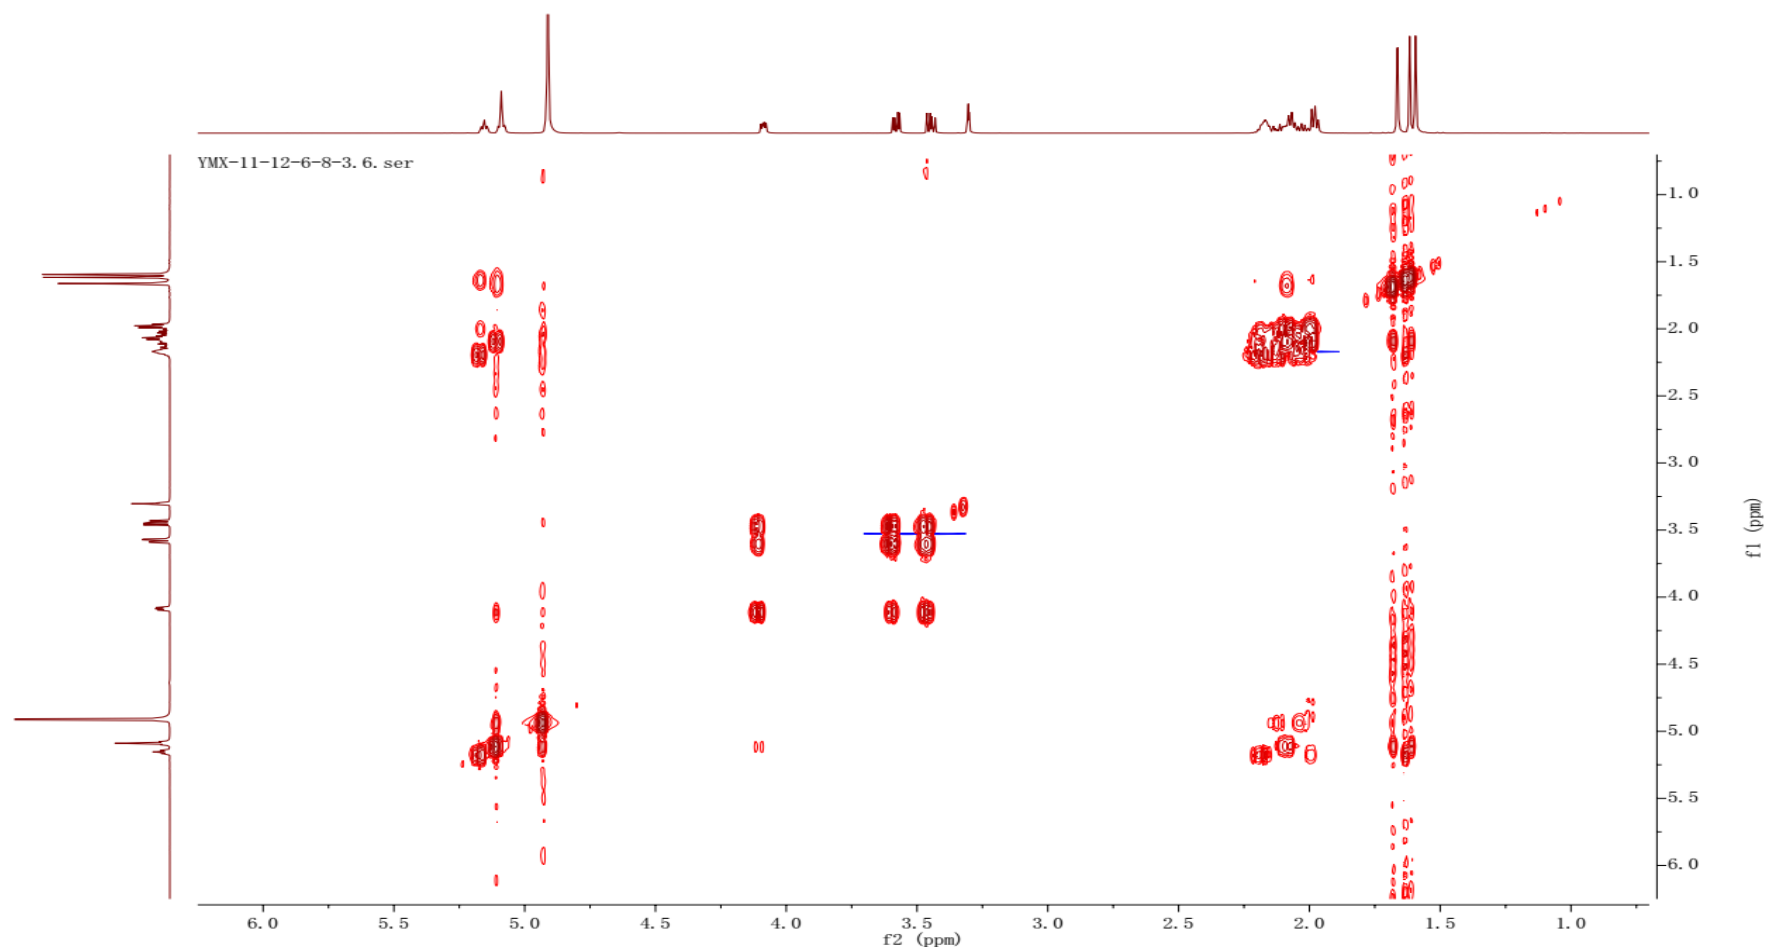

**Figure S65.**  $^1\text{H}$ - $^1\text{H}$  COSY spectrum of compound **7** ( $\text{CD}_3\text{OD}$ , 600 MHz)

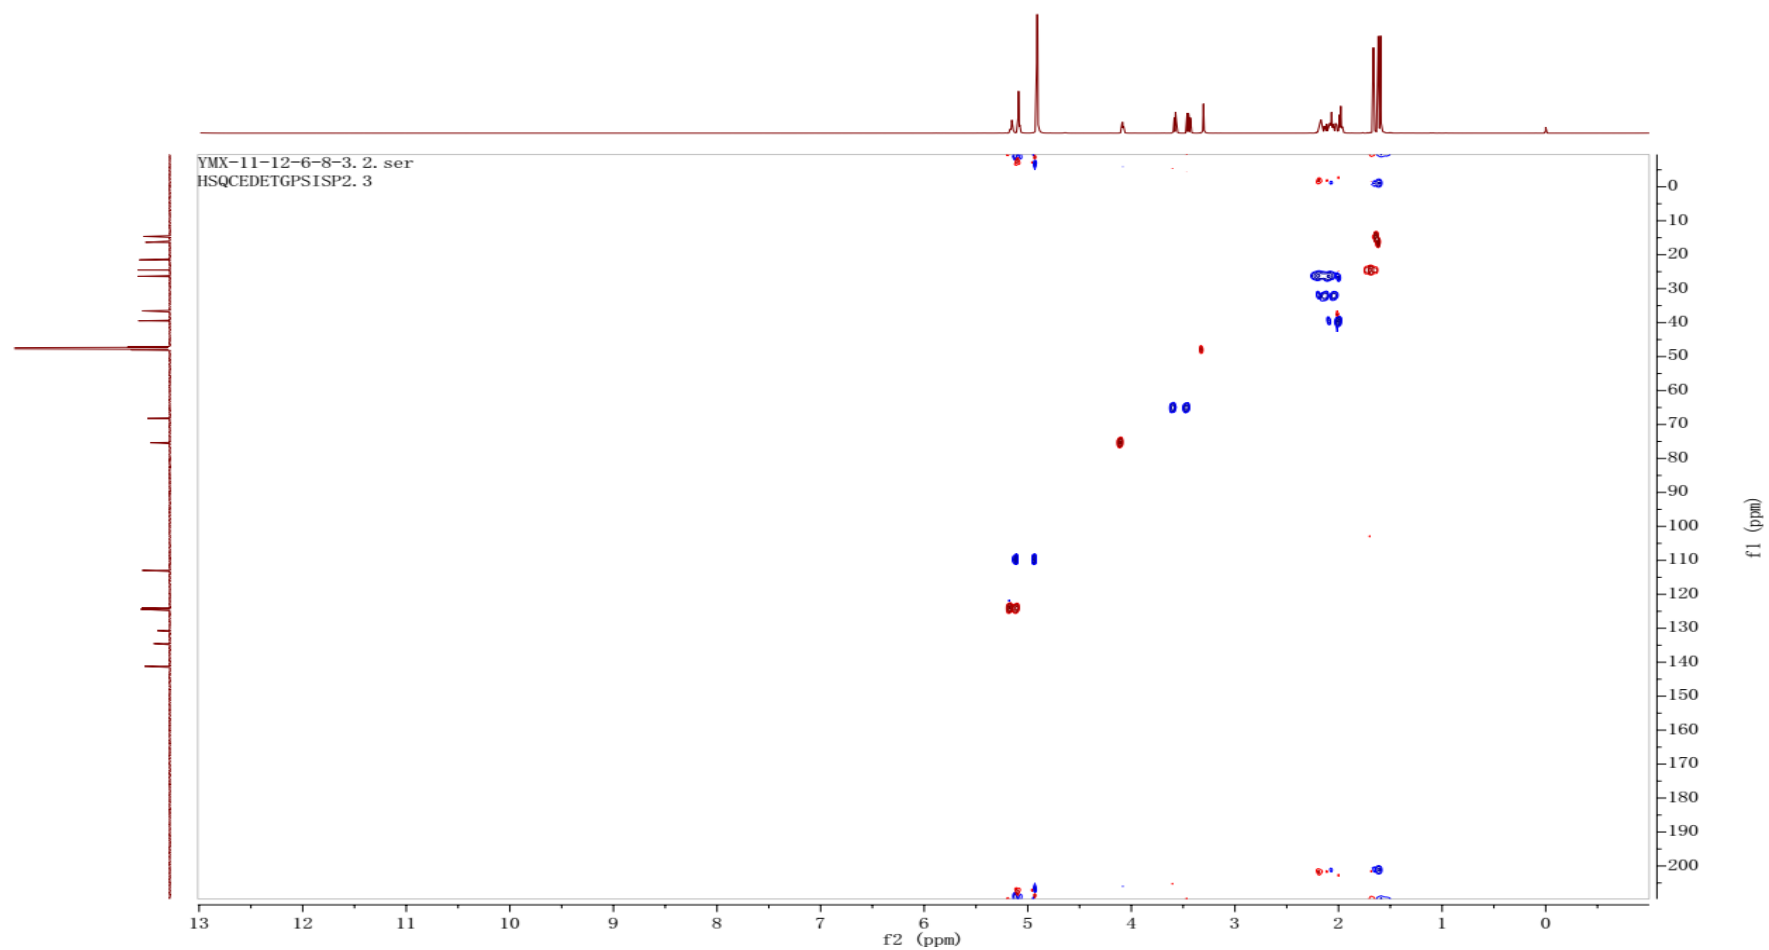

**Figure S66.** HSQC spectrum of compound **7** (CD<sub>3</sub>OD, 600 MHz)

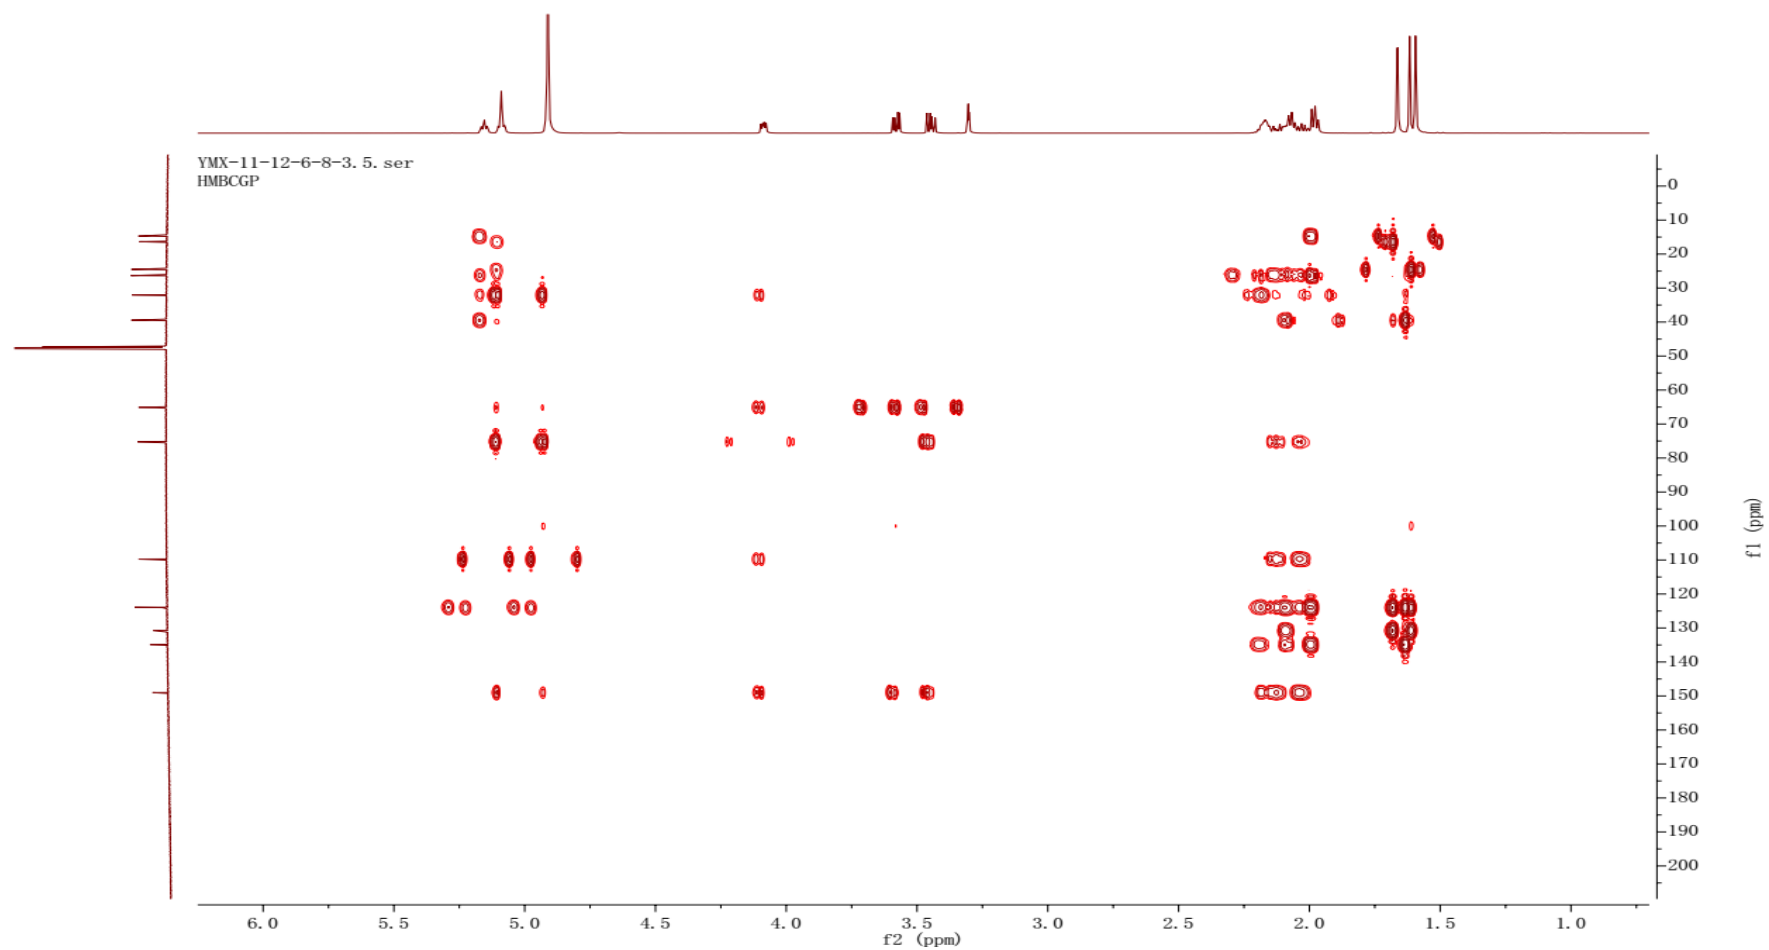

**Figure S67.** HMBC spectrum of compound **7** (CD<sub>3</sub>OD, 600 MHz)

## Qualitative Analysis Report

|                                                                                                                                                                                                                |                                                                                                                                                                                          |                                                                                                       |
|----------------------------------------------------------------------------------------------------------------------------------------------------------------------------------------------------------------|------------------------------------------------------------------------------------------------------------------------------------------------------------------------------------------|-------------------------------------------------------------------------------------------------------|
| <b>Data Filename</b><br><b>Sample Type</b><br><b>Instrument Name</b><br><b>Acq Method</b><br><b>IRM Calibration Status</b><br><b>Comment</b><br><b>Sample Group</b><br><b>Acquisition SW</b><br><b>Version</b> | YMX-11-12-6-8-3.d<br>Sample<br>Instrument 1<br>default20190111-ms.m<br><span style="background-color: #90EE90;">Success</span><br>6200 series TOF/6500 series<br>Q-TOF B.05.01 (B5125.3) | <b>Sample Name</b><br><b>Position</b><br><b>User Name</b><br><b>Acquired Time</b><br><b>DA Method</b> |
|                                                                                                                                                                                                                |                                                                                                                                                                                          | YMX-11-12-6-8-3<br>p1c2<br>Q-TOF-HP\Q-TOF<br>1/12/2020 4:11:00 PM<br>1.m                              |

**Info.**

### User Chromatograms

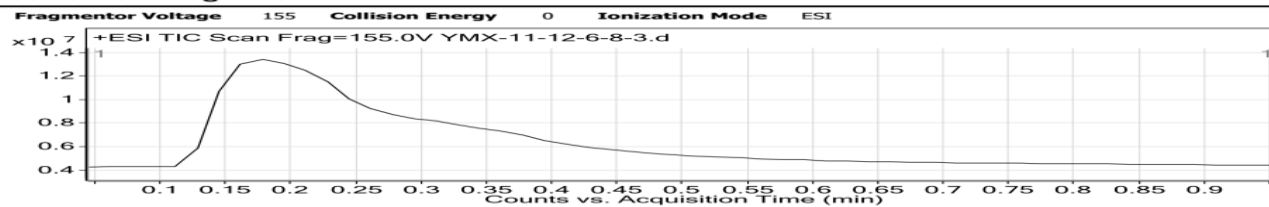

### User Spectra

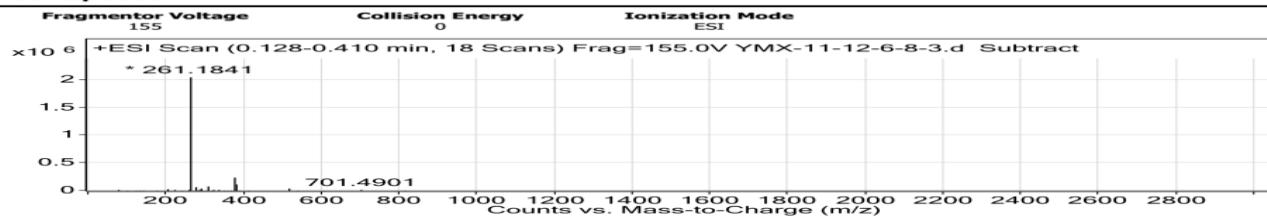

#### Peak List

| m/z      | z | Abund      |
|----------|---|------------|
| 261.1841 | 1 | 2048351.13 |
| 261.3211 | 1 | 247079.53  |
| 261.3652 |   | 79286.84   |
| 262.1848 | 1 | 765918.75  |
| 263.1873 | 1 | 64784.36   |
| 277.154  | 1 | 69289      |
| 287.1966 | 1 | 53615.05   |
| 305.2071 | 1 | 83044.34   |

Figure S68. HRESI spectrum of compound 7

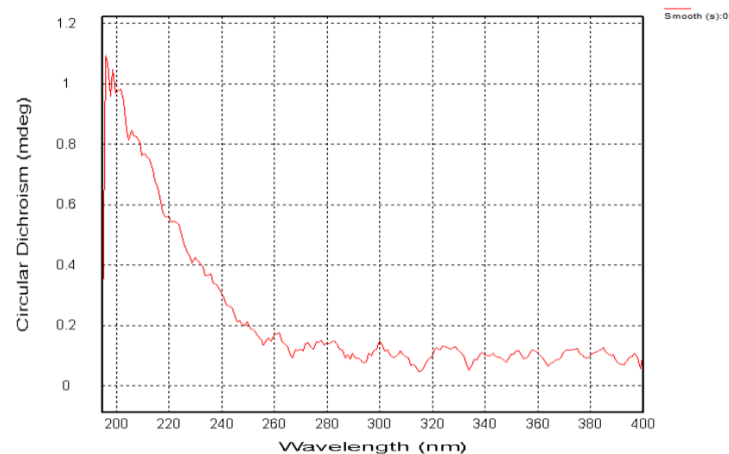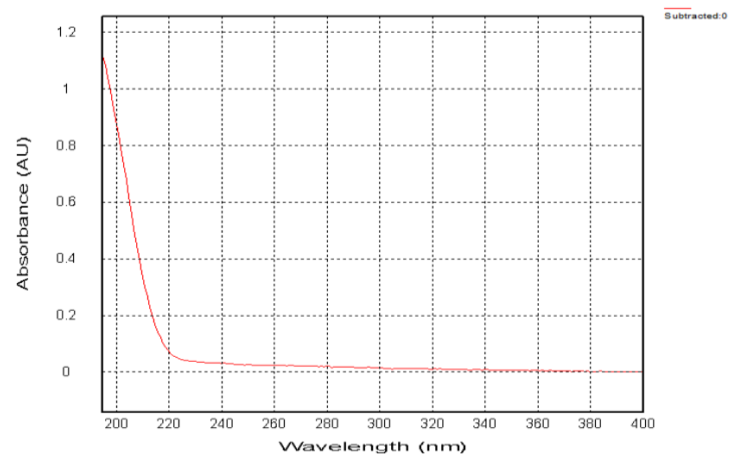

File: YMX-11-12-6-8-3 (195-400 nm) 20112721.dsx

ProBinaryX

Attributes :

- Time Stamp :Fri Nov 27 21:06:34 2020

- File ID : {B308C0DA-C265-4041-837A-C29D563B6A3C}

- Is CFR Compliant : false

- Original data has not been modified.

Remarks:

- User: CD

- Date: 2020/11/27

- Instrument: 0547

- DetectorType: LAAPD

- DichOS Calibration Correction Curve: 0547/2

- HV (CDDC channel): 0 v

- Time per point: 1 s

- Description: Sample 1

- Concentration: 0.0300mg/mL MeOH

- Pathlength: 1 mm

- Temperature: 20°C

Settings:

- Time-per-point: 1 s (25us x 40000)

- SE

- Wavelength: 195nm - 400nm

- Step Size: 1nm

- Bandwidth: 1nm

**Figure S69.** CD and UV spectrum of compound 7

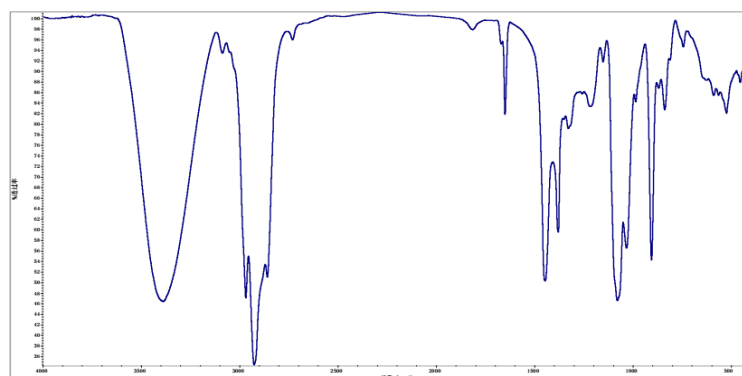

Sample Name: YMX-11-12-6-8-3

KBr压片

采集时间: 星期四 10月 29 13:59:18 2020 (GMT+08:00)

仪器型号: NICOLET IS10

Software version: OMNIC 9.8.372

样品扫描次数: 16  
背景扫描次数: 16  
分辨率: 4.000  
采样增益: 1.0  
扫描速度: 0.4747  
光阑: 80.00

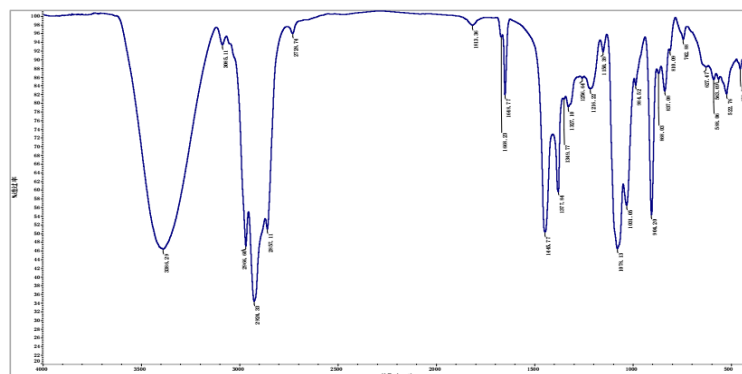

Sample Name: YMX-11-12-6-8-3

KBr压片

采集时间: 星期四 10月 29 13:59:18 2020 (GMT+08:00)

仪器型号: NICOLET IS10

Software version: OMNIC 9.8.372

样品扫描次数: 16  
背景扫描次数: 16  
分辨率: 4.000  
采样增益: 1.0  
扫描速度: 0.4747  
光阑: 80.00

星期四 10月 29 14:08:54 2020 (GMT+08:00)

标峰:

谱图: YMX-11-12-6-8-3

范围: 4000.00 400.00

(绝对) 阈值: 99.048

灵敏度: 99

峰表:

|      |         |     |        |
|------|---------|-----|--------|
| 峰位置: | 419.85  | 强度: | 91.589 |
| 峰位置: | 453.50  | 强度: | 87.820 |
| 峰位置: | 522.76  | 强度: | 82.009 |
| 峰位置: | 563.69  | 强度: | 85.413 |
| 峰位置: | 588.06  | 强度: | 85.353 |
| 峰位置: | 627.47  | 强度: | 88.267 |
| 峰位置: | 742.88  | 强度: | 94.593 |
| 峰位置: | 810.09  | 强度: | 92.055 |
| 峰位置: | 837.08  | 强度: | 82.668 |
| 峰位置: | 868.03  | 强度: | 86.752 |
| 峰位置: | 904.20  | 强度: | 54.157 |
| 峰位置: | 984.52  | 强度: | 84.050 |
| 峰位置: | 1031.05 | 强度: | 56.415 |
| 峰位置: | 1078.13 | 强度: | 46.430 |
| 峰位置: | 1150.39 | 强度: | 91.709 |
| 峰位置: | 1216.22 | 强度: | 83.269 |
| 峰位置: | 1256.64 | 强度: | 85.690 |
| 峰位置: | 1327.10 | 强度: | 79.070 |
| 峰位置: | 1349.77 | 强度: | 80.820 |
| 峰位置: | 1377.84 | 强度: | 59.485 |
| 峰位置: | 1445.77 | 强度: | 50.201 |
| 峰位置: | 1648.77 | 强度: | 81.777 |
| 峰位置: | 1668.23 | 强度: | 95.109 |
| 峰位置: | 1813.36 | 强度: | 97.836 |
| 峰位置: | 2728.74 | 强度: | 95.955 |
| 峰位置: | 2857.11 | 强度: | 50.853 |
| 峰位置: | 2924.33 | 强度: | 34.298 |
| 峰位置: | 2966.60 | 强度: | 46.976 |
| 峰位置: | 3085.11 | 强度: | 93.374 |
| 峰位置: | 3386.29 | 强度: | 46.275 |

Figure S70. IR spectrum of compound 7

### **Rudolph Research Analytical**

This sample was measured on an Autopol VI, Serial #91058  
Manufactured by Rudolph Research Analytical, Hackettstown, NJ, USA.

Measurement Date : Thursday, 26-NOV-2020

Set Temperature : OFF

Time Delay : Disabled

Delay between Measurement : Disabled

| <u>n</u>    | <u>Average</u>   | <u>Std.Dev.</u> | <u>% RSD</u>  | <u>Maximum</u> | <u>Minimum</u> |               |              |                     |              |  |
|-------------|------------------|-----------------|---------------|----------------|----------------|---------------|--------------|---------------------|--------------|--|
| 5           | 3.18             | 0.09            | 2.83          | 3.28           | 3.04           |               |              |                     |              |  |
| <u>S.No</u> | <u>Sample ID</u> | <u>Time</u>     | <u>Result</u> | <u>Scale</u>   | <u>OR °Arc</u> | <u>WLG.nm</u> | <u>Lg.mm</u> | <u>Conc.g/100ml</u> | <u>Temp.</u> |  |
| 1           | YMX-11-6-8-3     | 03:24:21 PM     | 3.20          | SR             | 0.0080         | 589           | 100.00       | 0.250               | 23.4         |  |
| 2           | YMX-11-6-8-3     | 03:24:30 PM     | 3.16          | SR             | 0.0079         | 589           | 100.00       | 0.250               | 23.4         |  |
| 3           | YMX-11-6-8-3     | 03:24:38 PM     | 3.28          | SR             | 0.0082         | 589           | 100.00       | 0.250               | 23.4         |  |
| 4           | YMX-11-6-8-3     | 03:24:46 PM     | 3.20          | SR             | 0.0080         | 589           | 100.00       | 0.250               | 23.4         |  |
| 5           | YMX-11-6-8-3     | 03:24:54 PM     | 3.04          | SR             | 0.0076         | 589           | 100.00       | 0.250               | 23.4         |  |

Figure S71.  $[\alpha]^{25}_D$  of compound 7

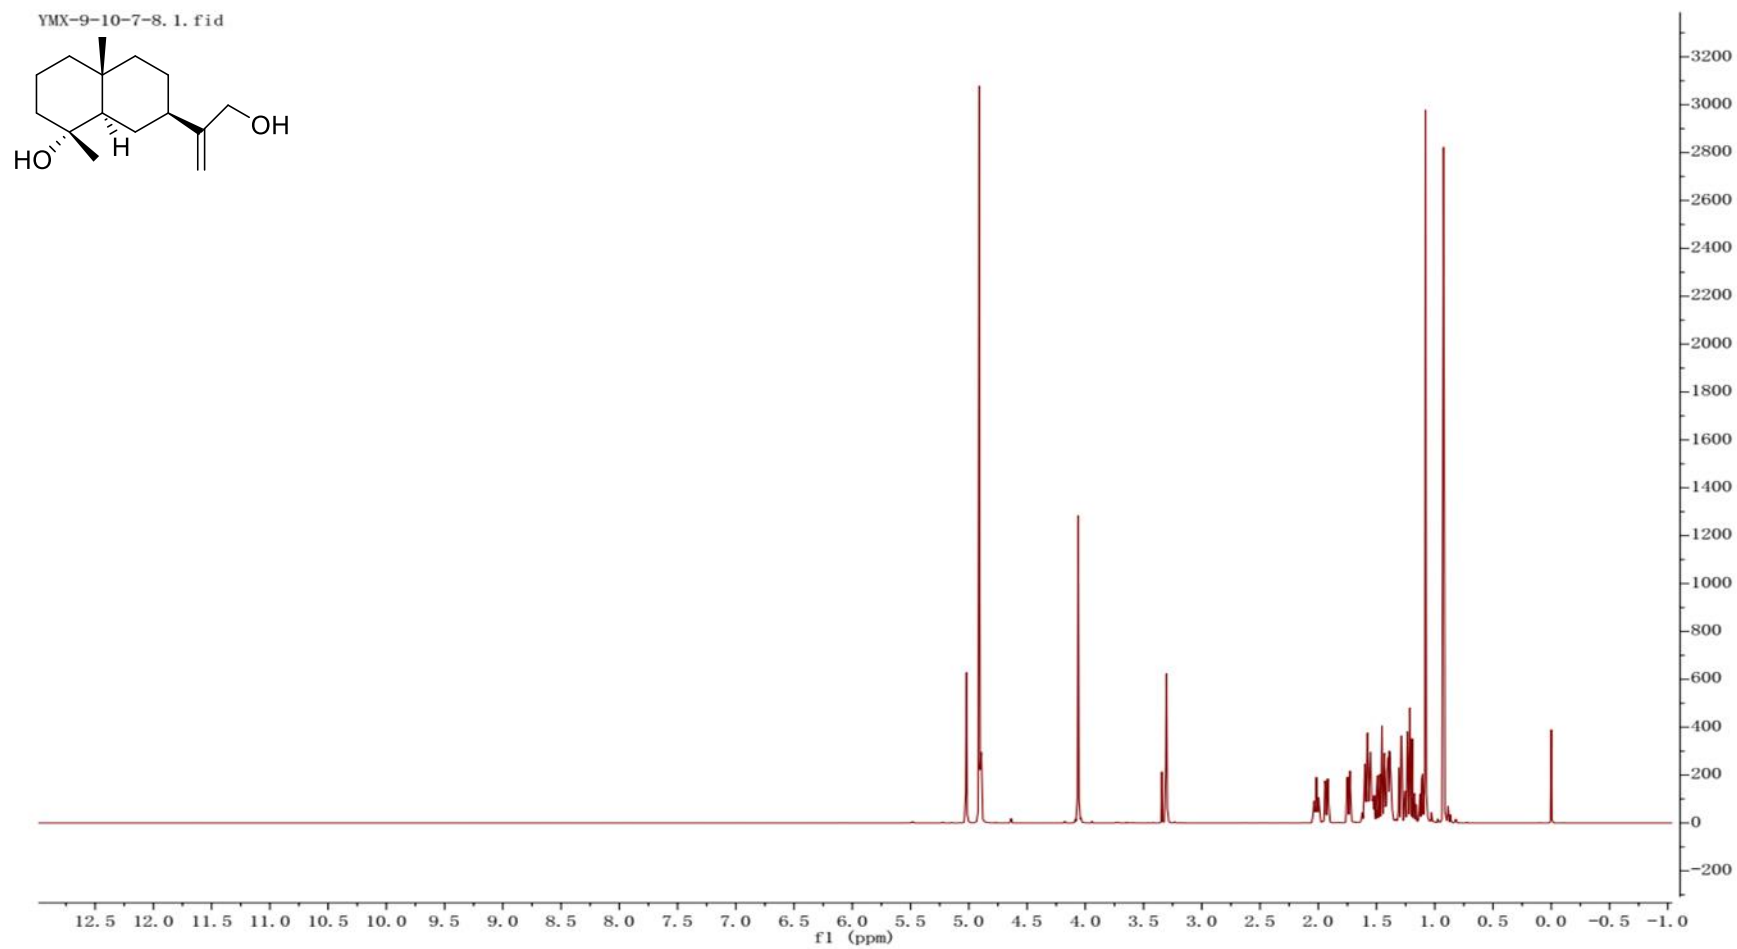

**Figure S72.** <sup>1</sup>H NMR spectrum of compound **10** (CD<sub>3</sub>OD, 600 MHz)

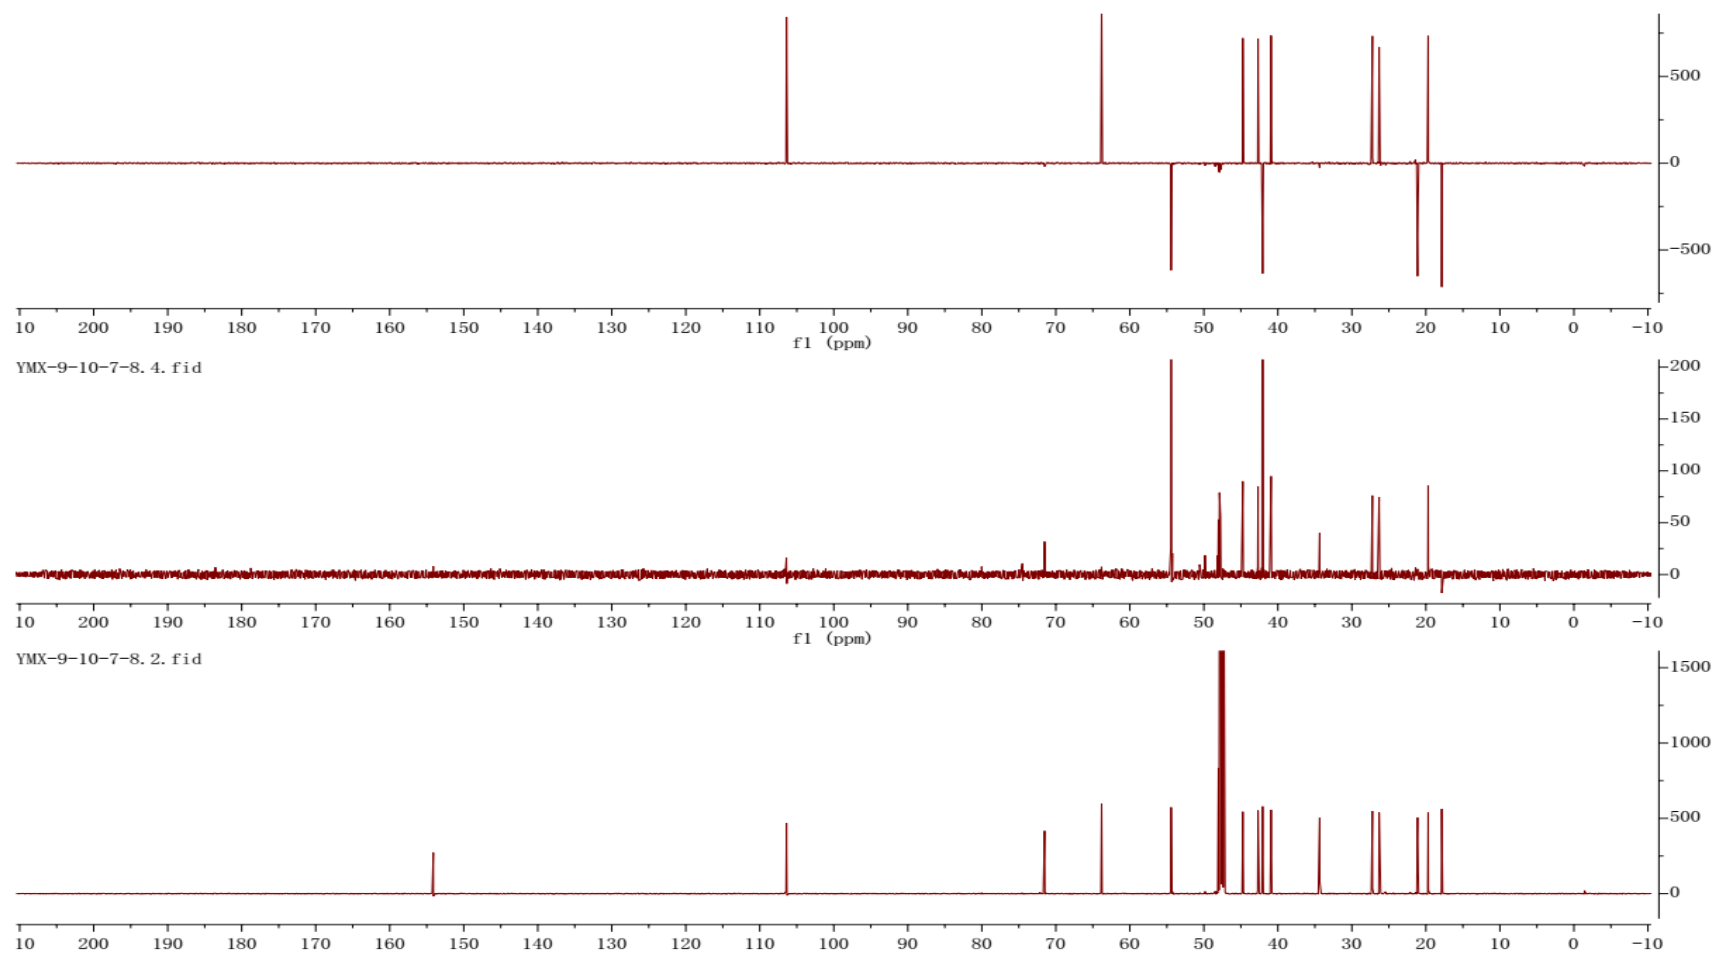

**Figure S73.** <sup>13</sup>C NMR and DEPT spectrum of compound **6** (CD<sub>3</sub>OD, 150 MHz)

|                      |                 |                    |       |                        |              |                               |                       |
|----------------------|-----------------|--------------------|-------|------------------------|--------------|-------------------------------|-----------------------|
| <b>Sample Name</b>   | YMX-9-10-7-8    | <b>Position</b>    | P1-B9 | <b>Instrument Name</b> | Instrument 1 | <b>User Name</b>              |                       |
| <b>Inj Vol</b>       | 1               | <b>InjPosition</b> |       | <b>SampleType</b>      | Sample       | <b>IRM Calibration Status</b> | Success               |
| <b>Data Filename</b> | YMX-9-10-7-8-.d | <b>ACQ Method</b>  | s-.m  | <b>Comment</b>         |              | <b>Acquired Time</b>          | 10/25/2019 2:35:31 PM |

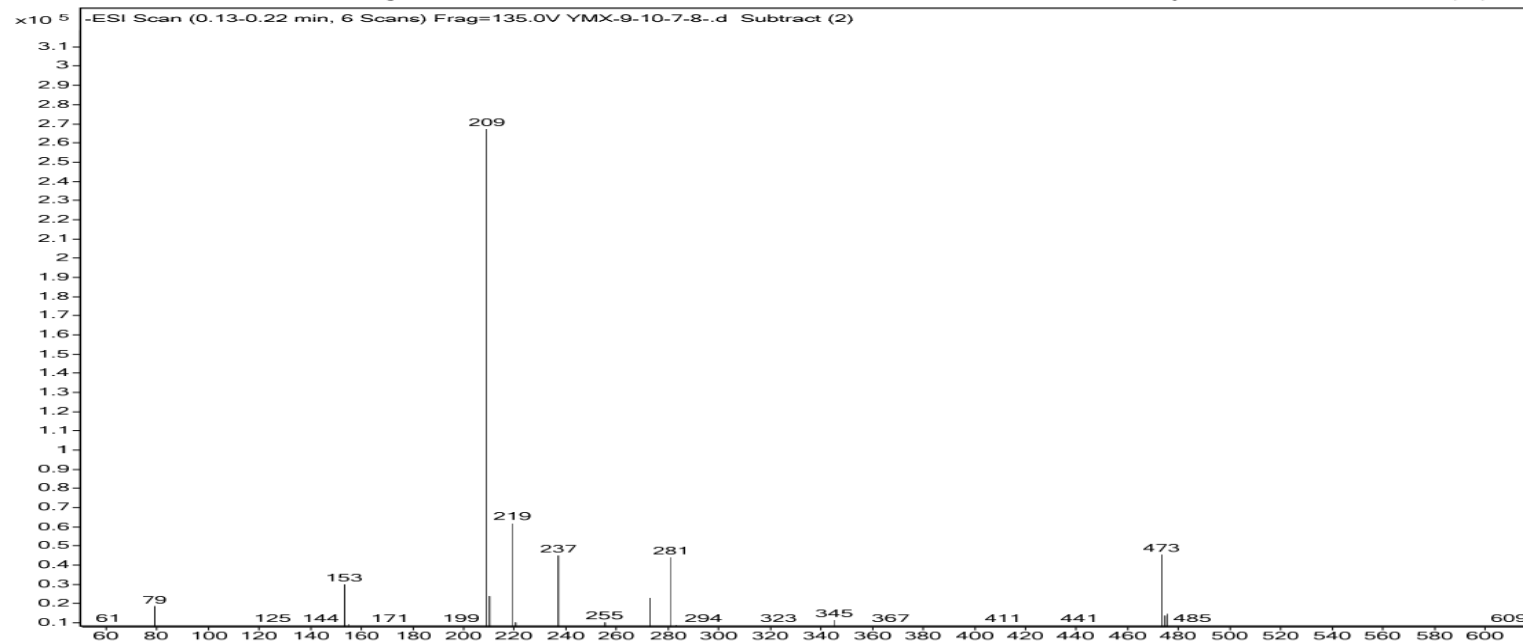

**Figure S74.** ESI+ spectrum of compound **10**

Crystal data for ymx-9-10-7-8:  $C_{15}H_{26}O_2$ ,  $M = 238.36$ ,  $a = 6.36380(10)$  Å,  $b = 9.3648(2)$  Å,  $c = 23.8658(4)$  Å,  $\alpha = 90^\circ$ ,  $\beta = 90^\circ$ ,  $\gamma = 90^\circ$ ,  $V = 1422.30(4)$  Å<sup>3</sup>,  $T = 100.(2)$  K, space group  $P212121$ ,  $Z = 4$ ,  $\mu(\text{Cu K}\alpha) = 0.555$  mm<sup>-1</sup>, 11628 reflections measured, 2807 independent reflections ( $R_{int} = 0.0377$ ). The final  $R_I$  values were 0.0292 ( $I > 2\sigma(I)$ ). The final  $wR(F^2)$  values were 0.0730 ( $I > 2\sigma(I)$ ). The final  $R_I$  values were 0.0304 (all data). The final  $wR(F^2)$  values were 0.0741 (all data). The goodness of fit on  $F^2$  was 1.059. Flack parameter = -0.01(7).

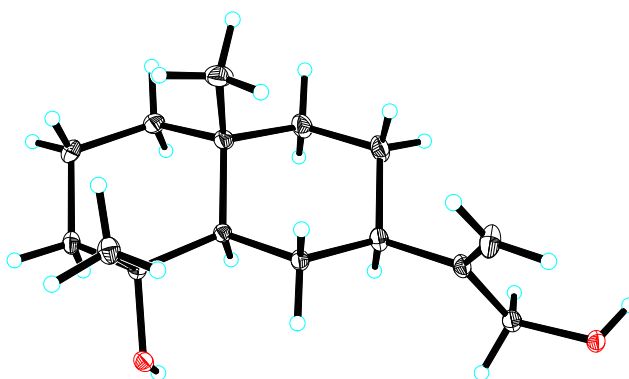

View of a molecule of ymx-9-10-7-8 with the atom-labelling scheme.

Displacement ellipsoids are drawn at the 30% probability level.

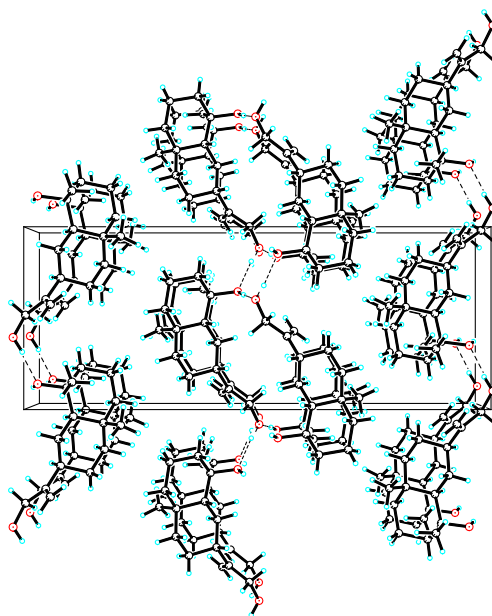

View of the pack drawing of ymx-9-10-7-8.

Hydrogen-bonds are shown as dashed lines.

Table 1. Crystal data and structure refinement for ymx-9-10-7-8.

|                                 |                                                |        |
|---------------------------------|------------------------------------------------|--------|
| Identification code             | global                                         |        |
| Empirical formula               | C <sub>15</sub> H <sub>26</sub> O <sub>2</sub> |        |
| Formula weight                  | 238.36                                         |        |
| Temperature                     | 100(2) K                                       |        |
| Wavelength                      | 1.54178 Å                                      |        |
| Crystal system                  | Orthorhombic                                   |        |
| Space group                     | P2 <sub>1</sub> 2 <sub>1</sub> 2 <sub>1</sub>  |        |
| Unit cell dimensions            | a = 6.36380(10) Å                              | = 90°. |
|                                 | b = 9.3648(2) Å                                | = 90°. |
|                                 | c = 23.8658(4) Å                               | = 90°. |
| Volume                          | 1422.30(4) Å <sup>3</sup>                      |        |
| Z                               | 4                                              |        |
| Density (calculated)            | 1.113 Mg/m <sup>3</sup>                        |        |
| Absorption coefficient          | 0.555 mm <sup>-1</sup>                         |        |
| F(000)                          | 528                                            |        |
| Crystal size                    | 0.230 x 0.180 x 0.140 mm <sup>3</sup>          |        |
| Theta range for data collection | 3.70 to 72.17°.                                |        |
| Index ranges                    | -6<=h<=7, -11<=k<=11, -29<=l<=29               |        |
| Reflections collected           | 11628                                          |        |

|                                        |                                       |
|----------------------------------------|---------------------------------------|
| Independent reflections                | 2807 [R(int) = 0.0377]                |
| Completeness to $\theta = 72.17^\circ$ | 99.8 %                                |
| Absorption correction                  | Semi-empirical from equivalents       |
| Max. and min. transmission             | 0.93 and 0.77                         |
| Refinement method                      | Full-matrix least-squares on $F^2$    |
| Data / restraints / parameters         | 2807 / 0 / 160                        |
| Goodness-of-fit on $F^2$               | 1.059                                 |
| Final R indices [ $I > 2\sigma(I)$ ]   | R1 = 0.0292, wR2 = 0.0730             |
| R indices (all data)                   | R1 = 0.0304, wR2 = 0.0741             |
| Absolute structure parameter           | -0.01(7)                              |
| Largest diff. peak and hole            | 0.188 and -0.168 e. $\text{\AA}^{-3}$ |

**Figure S75.** X-ray crystallographic analysis for compound **10**
